# Supplementary material for: Patterns of antibiotic use, pathogens, and prediction of mortality in hospitalized neonates and young infants with sepsis: A global neonatal sepsis observational cohort study (NeoOBS)
Source: PubMed Central journal article supplement (PMC10249878; doi:10.1371/journal.pmed.1004179), 2023-06-08
Supplement: pmed.1004179.s039.pdf [file pmed.1004179.s039.pdf]

**S8 Table. Organisms isolated from blood at baseline, by time from admission.**

| <b>Organisms isolated within 48hrs of admission (non-HAI)</b> | <b>N=1883</b> | <b>Organisms isolated &gt;48hrs after admission (HAI)</b> | <b>N=1312</b> |
|---------------------------------------------------------------|---------------|-----------------------------------------------------------|---------------|
| <i>Escherichia coli</i>                                       | 32 (1.7%)     | <i>Klebsiella pneumoniae</i>                              | 114 (8.7%)    |
| <i>Acinetobacter</i> spp.                                     | 21 (1.1%)     | <i>Coagulase-negative Staphylococci</i>                   | 70 (5.3%)     |
| <i>Klebsiella pneumoniae</i>                                  | 18 (1.0%)     | <i>Acinetobacter</i> spp.                                 | 51 (3.9%)     |
| <i>Staphylococcus aureus</i>                                  | 17 (0.9%)     | <i>Staphylococcus aureus</i>                              | 37 (2.8%)     |
| <i>Coagulase-negative staphylococci</i>                       | 14 (0.7%)     | <i>Enterobacter</i> spp.                                  | 32 (2.4%)     |
| <i>Streptococcus agalactiae</i>                               | 13 (0.7%)     | <i>Serratia</i> spp.                                      | 19 (1.5%)     |
| <i>Enterobacter</i> spp.                                      | 7 (0.4%)      | <i>Elizabethkingia meningoseptica</i>                     | 15 (1.1%)     |
| <i>Burkholderia</i> spp.                                      | 6 (0.3%)      | <i>Escherichia coli</i>                                   | 15 (1.1%)     |
| <i>Enterococcus faecalis</i>                                  | 3 (0.2%)      | <i>Candida albicans</i>                                   | 13 (1.0%)     |
| <i>Pseudomonas</i> spp.                                       | 3 (0.2%)      | <i>Enterococcus faecalis</i>                              | 11 (0.8%)     |
| <i>Streptococcus pyogenes</i>                                 | 3 (0.2%)      | <i>Citrobacter</i> spp.                                   | 8 (0.6%)      |
| <i>Citrobacter</i> spp.                                       | 2 (0.1%)      | <i>Enterococcus faecium</i>                               | 8 (0.6%)      |
| <i>Enterococcus faecium</i>                                   | 2 (0.1%)      | <i>Klebsiella oxytoca</i>                                 | 7 (0.5%)      |
| <i>Elizabethkingia anophelis</i>                              | 2 (0.1%)      | <i>Candida non-albicans</i>                               | 6 (0.5%)      |
| Other*                                                        | 8 (0.4%)      | <i>Streptococcus agalactiae</i>                           | 6 (0.5%)      |
|                                                               |               | <i>Burkholderia</i> spp.                                  | 6 (0.5%)      |
|                                                               |               | <i>Candida non-albicans</i>                               | 6 (0.5%)      |
|                                                               |               | <i>Elizabethkingia anophelis</i>                          | 5 (0.4%)      |
|                                                               |               | <i>Bacillus</i> spp.                                      | 4 (0.3%)      |
|                                                               |               | <i>Pseudomonas</i> spp.                                   | 4 (0.3%)      |
|                                                               |               | <i>Streptococcus pneumoniae</i>                           | 2 (0.2%)      |
|                                                               |               | Other*                                                    | 12 (0.9%)     |
