# Supplementary material for: Patterns of antibiotic use, pathogens, and prediction of mortality in hospitalized neonates and young infants with sepsis: A global neonatal sepsis observational cohort study (NeoOBS)
Source: PubMed Central journal article supplement (PMC10249878; doi:10.1371/journal.pmed.1004179), 2023-06-08
Supplement: pmed.1004179.s040.pdf [file pmed.1004179.s040.pdf]

**S9 Table. Susceptibility result for pathogens in baseline blood culture.**

|                                |   | <i>Klebsiella pneumoniae</i> | <i>Acinetobacter</i> spp. | <i>Escherichia coli</i> | <i>Staphylococcus aureus</i> | <i>Serratia</i> spp. | <i>Burkholderia</i> spp. | <i>Elizabethkingia meningoseptica</i> |
|--------------------------------|---|------------------------------|---------------------------|-------------------------|------------------------------|----------------------|--------------------------|---------------------------------------|
| <b>ampicillin</b>              | S | 0                            | 0                         | 0                       | 21 (39%)                     | 0                    | 0                        | 0                                     |
|                                | R | 132 (100%)                   | 72 (100%)                 | 47 (100%)               | 33 (61%)                     | 20 (100%)            | 12 (100%)                | 15 (100%)                             |
| <b>gentamicin</b>              | S | 50 (38%)                     | 19 (27%)                  | 37 (80%)                | 24 (57%)                     | 18 (90%)             | 0                        | 0                                     |
|                                | I | 5 (4%)                       | 2 (3%)                    | 0                       | 3 (7%)                       | 0                    | 0                        | 0                                     |
|                                | R | 75 (58%)                     | 50 (70%)                  | 9 (20%)                 | 15 (36%)                     | 2 (10%)              | 12 (100%)                | 15 (100%)                             |
| <b>ceftriaxone</b>             | S | 29 (23%)                     | 0                         | 27 (63%)                | 21 (39%)                     | 7 (64%)              | 0                        | 0                                     |
|                                | I | 2 (2%)                       | 0                         | 0                       | 0                            | 0                    | 0                        | 0                                     |
|                                | R | 96 (76%)                     | 72 (100%)                 | 16 (37%)                | 33 (61%)                     | 4 (36%)              | 12 (100%)                | 15 (100%)                             |
| <b>cefotaxime</b>              | S | 30 (23%)                     | 0                         | 29 (64%)                | 21 (39%)                     | 7 (64%)              | 0                        | 0                                     |
|                                | I | 2 (2%)                       | 0                         | 0                       | 0                            | 0                    | 0                        | 0                                     |
|                                | R | 96 (75%)                     | 72 (100%)                 | 16 (36%)                | 33 (61%)                     | 4 (36%)              | 12 (100%)                | 15 (100%)                             |
| <b>ceftazidime</b>             | S | 26 (28%)                     | 0                         | 29 (78%)                | 0                            | 7 (64%)              | 12 (100%)                | 0                                     |
|                                | I | 2 (2%)                       | 0                         | 0                       | 0                            | 0                    | 0                        | 0                                     |
|                                | R | 66 (70%)                     | 72 (100%)                 | 8 (22%)                 | 54 (100%)                    | 4 (36%)              | 0                        | 15 (100%)                             |
| <b>ciprofloxacin</b>           | S | 51 (50%)                     | 14 (24%)                  | 11 (44%)                | 21 (53%)                     | 13 (93%)             | 1 (13%)                  | 4 (31%)                               |
|                                | I | 4 (4%)                       | 0                         | 2 (8%)                  | 0                            | 1 (7%)               | 2 (25%)                  | 9 (69%)                               |
|                                | R | 48 (47%)                     | 45 (76%)                  | 12 (48%)                | 19 (48%)                     | 0                    | 5 (63%)                  | 0                                     |
| <b>levofloxacin</b>            | S | 20 (56%)                     | 13 (48%)                  | 10 (53%)                | 16 (64%)                     | 4 (80%)              | 3 (27%)                  | 13 (100%)                             |
|                                | I | 2 (6%)                       | 3 (11%)                   | 3 (16%)                 | 0                            | 1 (20%)              | 1 (9%)                   | 0                                     |
|                                | R | 14 (39%)                     | 11 (41%)                  | 6 (32%)                 | 9 (36%)                      | 0                    | 7 (64%)                  | 0                                     |
| <b>piperacillin-tazobactam</b> | S | 50 (44%)                     | 0                         | 38 (90%)                | 21 (39%)                     | 6 (75%)              | 0                        | 1 (7%)                                |
|                                | I | 11 (10%)                     | 0                         | 2 (5%)                  | 0                            | 1 (13%)              | 0                        | 0                                     |
|                                | R | 53 (46%)                     | 72 (100%)                 | 2 (5%)                  | 33 (61%)                     | 1 (13%)              | 12 (100%)                | 13 (93%)                              |
| <b>meropenem</b>               | S | 88 (67%)                     | 19 (27%)                  | 38 (97%)                | 21 (39%)                     | 18 (90%)             | 10 (91%)                 | 0                                     |
|                                | I | 1 (1%)                       | 1 (1%)                    | 0                       | 0                            | 0                    | 1 (9%)                   | 0                                     |
|                                | R | 43 (33%)                     | 50 (71%)                  | 1 (3%)                  | 33 (61%)                     | 2 (10%)              | 0                        | 15 (100%)                             |
| <b>colistin</b>                | S | 39 (100%)                    | 43 (98%)                  | 4 (100%)                | 0                            | 0                    | 0                        | 0                                     |
|                                | I | 0                            | 1 (2%)                    | 0                       | 0                            | 0                    | 0                        | 0                                     |
|                                | R | 0                            | 0                         | 0                       | 54 (100%)                    | 19 (100%)            | 12 (100%)                | 15 (100%)                             |
| <b>amikacin</b>                | S | 80 (62%)                     | 19 (27%)                  | 43 (93%)                | 24 (57%)                     | 15 (75%)             | 0                        | 0                                     |
|                                | I | 10 (8%)                      | 1 (1%)                    | 1 (2%)                  | 3 (7%)                       | 1 (5%)               | 0                        | 0                                     |
|                                | R | 40 (31%)                     | 51 (72%)                  | 2 (4%)                  | 15 (36%)                     | 4 (20%)              | 12 (100%)                | 15 (100%)                             |
| <b>vancomycin</b>              | S | 0                            | 0                         | 0                       | 42 (100%)                    | 0                    | 0                        | 0                                     |
|                                | R | 132 (100%)                   | 72 (100%)                 | 47 (100%)               | 0                            | 20 (100%)            | 12 (100%)                | 15 (100%)                             |
| <b>methicillin</b>             | S | 31 (23%)                     | 0                         | 24 (51%)                | 21 (39%)                     | 1 (5%)               | 0                        | 0                                     |
|                                | I | 0                            | 0                         | 1 (2%)                  | 0                            | 0                    | 0                        | 0                                     |
|                                | R | 101 (77%)                    | 0                         | 22 (47%)                | 33 (61%)                     | 19 (95%)             | 0                        | 0                                     |
