# Supplementary material for: Patterns of antibiotic use, pathogens, and prediction of mortality in hospitalized neonates and young infants with sepsis: A global neonatal sepsis observational cohort study (NeoOBS)
Source: PubMed Central journal article supplement (PMC10249878; doi:10.1371/journal.pmed.1004179), 2023-06-08
Supplement: pmed.1004179.s041.pdf [file pmed.1004179.s041.pdf]

**S10 Table. Organisms isolated from CSF in first 7 days from baseline.**

| <b>Class</b>  | <b>Organism</b>                         | <b>Pathogen</b> | <b>Contaminant</b> | <b>Unclassified</b> |
|---------------|-----------------------------------------|-----------------|--------------------|---------------------|
| Gram-positive | <i>Streptococcus agalactiae</i>         | 3               | 0                  | 0                   |
|               | <i>Coagulase-negative Staphylococci</i> | 2               | 7                  | 1                   |
|               | <i>Enterococcus faecalis</i>            | 2               | 1                  | 0                   |
|               | <i>Enterococcus faecium</i>             | 2               | 0                  | 0                   |
|               | <i>Bacillus</i> spp.                    | 0               | 12                 | 1                   |
|               | <i>Micrococcus</i> spp.                 | 0               | 1                  | 0                   |
|               | <i>Streptococcus oralis</i>             | 0               | 1                  | 0                   |
|               | <i>Corynebacterium</i> spp.             | 0               | 1                  | 0                   |
| Gram-negative | <i>Acinetobacter baumannii</i>          | 11              | 0                  | 0                   |
|               | <i>Escherichia coli</i>                 | 9               | 0                  | 0                   |
|               | <i>Klebsiella pneumoniae</i>            | 9               | 0                  | 0                   |
|               | <i>Elizabethkingia meningoseptica</i>   | 4               | 0                  | 0                   |
|               | <i>Elizabethkingia anophelis</i>        | 3               | 0                  | 0                   |
|               | <i>Enterobacter</i> spp.                | 2               | 0                  | 0                   |
|               | <i>Burkholderia</i> spp.                | 1               | 0                  | 0                   |
|               | <i>Proteus mirabilis</i>                | 1               | 0                  | 0                   |
|               | <i>Sphingomonas paucimobilis</i>        | 1               | 0                  | 0                   |
|               | <i>Acinetobacter ursingii</i>           | 0               | 1                  | 0                   |
