# Supplementary material for: Patterns of antibiotic use, pathogens, and prediction of mortality in hospitalized neonates and young infants with sepsis: A global neonatal sepsis observational cohort study (NeoOBS)
Source: PubMed Central journal article supplement (PMC10249878; doi:10.1371/journal.pmed.1004179), 2023-06-08
Supplement: pmed.1004179.s042.pdf [file pmed.1004179.s042.pdf]

**S11 Table. Pathogens and mortality.**

| <b>Factor</b>                   | <b>Univariable</b>                     | <b>Adjusted for unmodifiable baseline predictors*</b> | <b>Adjusted for all baseline predictors**</b> |
|---------------------------------|----------------------------------------|-------------------------------------------------------|-----------------------------------------------|
| Pathogen at baseline            | 1.65 (1.30 – 2.10)<br><i>p</i> <0.001  | 1.54 (1.21 – 1.97)<br><i>p</i> =0.001                 | 1.57 (1.22 – 2.02)<br><i>p</i> <0.001         |
| Pathogen type at baseline       |                                        |                                                       |                                               |
| No pathogen                     | ref.                                   | ref.                                                  | ref.                                          |
| Gram positive pathogen          | 0.96 (0.57 – 1.62)                     | 1.06 (0.63 – 1.80)                                    | 1.35 (0.79 – 2.30)                            |
| Gram negative pathogen          | 1.80 (1.37 – 2.35)                     | 1.62 (1.24 – 2.12)                                    | 1.55 (1.17 – 2.04)                            |
| Fungal pathogen                 | 4.55 (2.21 – 9.36)<br><i>p</i> <0.0001 | 3.84 (1.79 – 8.20)<br><i>p</i> =0.0003                | 4.24 (1.94 – 9.30)<br><i>p</i> =0.0007        |
| Pathogen at baseline            |                                        |                                                       |                                               |
| No pathogen                     | ref.                                   | ref.                                                  | ref.                                          |
| <i>Acinetobacter</i> spp.       | 2.70 (1.76 – 4.14)                     | 2.01 (1.30 – 3.10)                                    | 1.96 (1.27 – 3.05)                            |
| <i>Klebsiella pneumoniae</i>    | 1.92 (1.29 – 2.86)                     | 1.77 (1.18 – 2.66)                                    | 1.49 (0.99 – 2.25)                            |
| <i>E. coli</i>                  | 1.77 (0.79 – 4.00)                     | 2.13 (0.94 – 4.81)                                    | 2.33 (1.01 – 5.37)                            |
| <i>S. aureus</i>                | 1.03 (0.46 – 2.33)                     | 1.02 (0.45 – 2.31)                                    | 1.22 (0.53 – 2.80)                            |
| <i>Streptococcus agalactiae</i> | 2.65 (0.98 – 7.18)                     | 3.30 (1.20 – 9.03)                                    | 3.40 (1.22 – 9.48)                            |
| Other pathogen***               | 1.17 (0.80 – 1.73)<br><i>p</i> =0.0001 | 1.14 (0.77 – 1.69)<br><i>p</i> =0.0032                | 1.28 (0.86 – 1.92)<br><i>p</i> =0.0098        |
