# Supplementary material for: Patterns of antibiotic use, pathogens, and prediction of mortality in hospitalized neonates and young infants with sepsis: A global neonatal sepsis observational cohort study (NeoOBS)
Source: PubMed Central journal article supplement (PMC10249878; doi:10.1371/journal.pmed.1004179), 2023-06-08
Supplement: pmed.1004179.s045.pdf [file pmed.1004179.s045.pdf]

**S14 Table. Comparison of factors in NeoOBS Sepsis Severity score with existing scores and sepsis criteria.**

| Mortality prediction, sepsis criteria & sepsis severity scores in neonates |                             |                                                   |                                          |                                      |                                          |                                                                  |                                         |                                            |                                                              |                                                                       |
|----------------------------------------------------------------------------|-----------------------------|---------------------------------------------------|------------------------------------------|--------------------------------------|------------------------------------------|------------------------------------------------------------------|-----------------------------------------|--------------------------------------------|--------------------------------------------------------------|-----------------------------------------------------------------------|
|                                                                            |                             | General mortality prediction scores               |                                          |                                      | Existing Sepsis Criteria                 |                                                                  |                                         | Sepsis severity scoring                    |                                                              |                                                                       |
|                                                                            |                             | High income example                               | LMIC based                               |                                      |                                          |                                                                  |                                         |                                            | nSOFA sepsis severity score <sup>1,2</sup>                   | NeoSep Sepsis severity & recovery scores                              |
|                                                                            |                             | CRIB II mortality prediction score (& CRIB)       | NMR 2000 <sup>3</sup>                    | SAWS score <sup>4</sup>              | Modified sick neonate score <sup>5</sup> | pSBI criteria <sup>6</sup><br><i>(* = critical illness sign)</i> | EMA <sup>7</sup>                        | NeoOBS inclusion criteria                  |                                                              |                                                                       |
| <b>Purpose of score/criteria</b>                                           |                             | Mortality prediction in LBW neonates              | Mortality prediction in LBW neonates     | Mortality prediction in LBW neonates | Mortality prediction in neonates         | Clinical diagnosis of sepsis                                     | Enrolment in clinical trials for sepsis | Enrolment in observational study of sepsis | Severity of organ failure and mortality prediction in sepsis |                                                                       |
| <b>Number of neonates from LMIC context included to generate score</b>     |                             | -                                                 | 550<br><i>(110,176 from high income)</i> | 428                                  | 585                                      | -                                                                | -                                       | -                                          | None<br><i>(679 from high income)</i>                        | 3204                                                                  |
| <b>Relevant age for use of score</b>                                       |                             | <12 hrs                                           | <24hrs                                   | <72hrs                               | Majority <2 days                         | <60 days                                                         | <28 days                                | <60 days                                   | 4-120 days<br>(95% <60d)                                     | <60 days                                                              |
| <b>Weight category of included babies</b>                                  |                             | LBW                                               | <2kg                                     | <1.5kg                               | Majority <2kg                            | >1.5kg                                                           | Any                                     | Any                                        | Majority <1.5kg (88%)                                        | Any                                                                   |
| <b>Specifically developed for sepsis?</b>                                  |                             | No                                                | No                                       | No                                   | No                                       | Yes                                                              | Yes                                     | Yes                                        | Yes                                                          | Yes                                                                   |
| <b>Adapted to LMIC context</b>                                             |                             | No                                                | Yes                                      | Yes                                  | Yes                                      | Yes                                                              | No                                      | Yes                                        | No                                                           | Yes                                                                   |
| <b>Predominantly community or hospital based</b>                           |                             | Hosp                                              | Hosp                                     | Hosp                                 | Hosp                                     | Comm                                                             | Hosp                                    | Hosp                                       | Hosp                                                         | Hosp                                                                  |
| <b>Factors in score / criteria</b>                                         | <b>Baby characteristics</b> | Birth weight, Sex, <i>Congenital malformation</i> | Gestation, Weight, Sex                   | Sex, Age, Weight, Gestation          | Birth weight, Gestation                  | -                                                                | -                                       | -                                          | -                                                            | Birth weight, Time in Hospital, Gestational age, Congenital anomalies |
|                                                                            | <b>Vital signs</b>          | Temp                                              | SpO2 at admission                        | -                                    | HR, SpO2, Glucose, CRT,                  | Temp <35.5C ≥38C                                                 | Temp <35.5C ≥38C, Temp instability,     | Temp <35.5C ≥38C,                          | -                                                            | Abnormal temp (<35.5, ≥38 – <39 °C, ≥39°C)                            |

| Mortality prediction, sepsis criteria & sepsis severity scores in neonates |                                             |                         |                         |                                          |                                                                  |                                                                                                                                     |                                                                                                                  |                                                                        |                                                                                             |
|----------------------------------------------------------------------------|---------------------------------------------|-------------------------|-------------------------|------------------------------------------|------------------------------------------------------------------|-------------------------------------------------------------------------------------------------------------------------------------|------------------------------------------------------------------------------------------------------------------|------------------------------------------------------------------------|---------------------------------------------------------------------------------------------|
|                                                                            | General mortality prediction scores         |                         |                         |                                          | Existing Sepsis Criteria                                         |                                                                                                                                     |                                                                                                                  | Sepsis severity scoring                                                |                                                                                             |
|                                                                            | High income example                         | LMIC based              |                         |                                          |                                                                  |                                                                                                                                     |                                                                                                                  | nSOFA sepsis severity score <sup>1,2</sup>                             | NeoSep Sepsis severity & recovery scores                                                    |
|                                                                            | CRIB II mortality prediction score (& CRIB) | NMR 2000 <sup>3</sup>   | SAWS score <sup>4</sup> | Modified sick neonate score <sup>5</sup> | pSBI criteria <sup>6</sup><br>(*= <i>critical illness sign</i> ) | EMA <sup>7</sup>                                                                                                                    | NeoOBS inclusion criteria                                                                                        |                                                                        |                                                                                             |
|                                                                            |                                             |                         |                         | Temp,                                    |                                                                  | HR<10 <sup>th</sup> centile<br>HR >2SD above normal                                                                                 | Temp instability,<br>HR >180<br>HR <100                                                                          |                                                                        |                                                                                             |
| <b>Respiratory signs</b>                                                   | Min/Max FiO2 <12hrs                         | Max respiratory support | -                       | Increased respiratory effort             | Fast breathing,<br>Severe indrawing                              | Apnoea,<br>Tachypnoea,<br>Increased O2 requirement,<br>Ventilatory support                                                          | Apnoea,<br>Grunting,<br>Cyanosis,<br>Severe chest indrawing,<br>Increased O2 requirement,<br>Ventilatory support | SpO2/FiO2 ratio,<br>Requirement for Invasive ventilation               | O2 or ventilation support,<br>Cyanosis (recovery score only)                                |
| <b>Circulatory signs</b>                                                   | -                                           | -                       | -                       | -                                        | -                                                                | Bradycardia,<br>Tachycardia,<br>Rhythm instability,<br>Reduced urine output,<br>Hypotension,<br>Mottled skin,<br>Impaired perfusion | CRT >3<br>or<br>Mottled skin<br>or<br>Other evidence of shock                                                    | Requirement for inotropes,<br>Requirement for steroids for hypotension | Evidence of shock (including any of: CRT >3secs, mottled skin, cold peripheries or 'other') |
| <b>Gastrointestinal signs</b>                                              | -                                           | -                       | -                       | -                                        | Poor feeding<br><i>Not feeding at all*</i>                       | Feeding intolerance,<br>Poor sucking,<br>Abdominal distension                                                                       | Difficulty feeding<br>Or<br>Feeding intolerance,<br>Abdominal distension                                         | -                                                                      | Difficulty feeding/ feeding intolerance,<br>Abdominal distension                            |

| Mortality prediction, sepsis criteria & sepsis severity scores in neonates |                                             |                       |                         |                                          |                                                                                     |                                                                                                                                          |                                                                                                                                                                                      |                                            |                                          |
|----------------------------------------------------------------------------|---------------------------------------------|-----------------------|-------------------------|------------------------------------------|-------------------------------------------------------------------------------------|------------------------------------------------------------------------------------------------------------------------------------------|--------------------------------------------------------------------------------------------------------------------------------------------------------------------------------------|--------------------------------------------|------------------------------------------|
|                                                                            | General mortality prediction scores         |                       |                         |                                          | Existing Sepsis Criteria                                                            |                                                                                                                                          |                                                                                                                                                                                      | Sepsis severity scoring                    |                                          |
|                                                                            | High income example                         | LMIC based            |                         |                                          |                                                                                     |                                                                                                                                          |                                                                                                                                                                                      | nSOFA sepsis severity score <sup>1,2</sup> | NeoSep Sepsis severity & recovery scores |
|                                                                            | CRIB II mortality prediction score (& CRIB) | NMR 2000 <sup>3</sup> | SAWS score <sup>4</sup> | Modified sick neonate score <sup>5</sup> | pSBI criteria <sup>6</sup><br><i>(* = critical illness sign)</i>                    | EMA <sup>7</sup>                                                                                                                         | NeoOBS inclusion criteria                                                                                                                                                            |                                            |                                          |
| <b>Neurological signs</b>                                                  | -                                           | -                     | -                       | -                                        | Movement only when stimulated<br>Or<br><i>no movement at all*,<br/>Convulsions*</i> | Irritability,<br>Lethargy,<br>Hypotonia                                                                                                  | No movement or<br>Movement only when stimulated,<br>Bulging fontanelle,<br>Lethargy or drowsiness,<br>Hypotonia / floppiness,<br>Abnormal posturing,<br>Convulsions,<br>Irritability |                                            |                                          |
| <b>Skin / umbilicus</b>                                                    | -                                           | -                     | -                       | -                                        | -                                                                                   | Petechial rash,<br>Sclerema                                                                                                              | Petechial rash,<br>Multiple or severe skin pustules,<br>Pus from umbilical stump                                                                                                     | -                                          |                                          |
| <b>Laboratory signs</b>                                                    | Max base deficit <12h                       | -                     | -                       | -                                        | -                                                                                   | WBC<br><4 x10 <sup>9</sup><br>>20 x10 <sup>9</sup><br>cells/mL<br><br>IT ratio >0.2<br><br>Platelets<br><100x10 <sup>9</sup><br>cells/mL | WBC<br><4 x10 <sup>9</sup><br>>20 x10 <sup>9</sup><br>cells/mL<br><br>Neutrophils<br><1.5x10 <sup>9</sup><br>cells/mL<br><br>IT ratio >0.2                                           | Severity of thrombocytopaenia              | -                                        |

| Mortality prediction, sepsis criteria & sepsis severity scores in neonates |  |                                             |                       |                         |                                          |                                                           |                                                                                                                              |                                                                         |                                          |
|----------------------------------------------------------------------------|--|---------------------------------------------|-----------------------|-------------------------|------------------------------------------|-----------------------------------------------------------|------------------------------------------------------------------------------------------------------------------------------|-------------------------------------------------------------------------|------------------------------------------|
|                                                                            |  | General mortality prediction scores         |                       |                         | Existing Sepsis Criteria                 |                                                           |                                                                                                                              | Sepsis severity scoring                                                 |                                          |
|                                                                            |  | High income example                         | LMIC based            |                         |                                          |                                                           |                                                                                                                              | nSOFA sepsis severity score <sup>1,2</sup>                              | NeoSep Sepsis severity & recovery scores |
|                                                                            |  | CRIB II mortality prediction score (& CRIB) | NMR 2000 <sup>3</sup> | SAWS score <sup>4</sup> | Modified sick neonate score <sup>5</sup> | pSBI criteria <sup>6</sup><br>(* = critical illness sign) | EMA <sup>7</sup>                                                                                                             |                                                                         |                                          |
|                                                                            |  |                                             |                       |                         |                                          |                                                           | CRP >15mg/L<br>Procalcitonin ≥2 ng/ml<br><br>Glucose intolerance<br><br>Metabolic acidosis (BE <-10 mEq/L, Lactate >2mMol/L) | CRP >10mg/L<br><br>Metabolic acidosis (BE <-10 mEq/L, Lactate >2mMol/L) |                                          |

#### References

1. Wynn, J. L. & Polin, R. A. A neonatal sequential organ failure assessment score predicts mortality to late-onset sepsis in preterm very low birth weight infants. *Pediatr. Res.* **88**, 85–90 (2020).
2. Wynn, J. L. *et al.* Timing of Multiorgan Dysfunction among Hospitalized Infants with Fatal Fulminant Sepsis. *Am. J. Perinatol.* **34**, 633–639 (2017).
3. Medvedev, M. M. *et al.* Development and validation of a simplified score to predict neonatal mortality risk among neonates weighing 2000 g or less (NMR-2000): an analysis using data from the UK and The Gambia. *Lancet Child Adolesc. Heal.* **4**, 299–311 (2020).
4. Rosenberg, R. E. *et al.* Simplified Age-Weight Mortality Risk Classification for Very Low Birth Weight Infants in Low-Resource Settings. *J. Pediatr.* **153**, 519–524.e3 (2008).
5. Mansoor, K. P. *et al.* Modified Sick Neonatal Score (MSNS): A Novel Neonatal Disease Severity Scoring System for Resource-Limited Settings. *Crit. Care Res. Pract.* **2019**, 9059073 (2019).
6. WHO. *Managing possible serious bacterial infection in young infants when referral is not feasible.* (2015).
7. Tuzun, F. *et al.* Is European Medicines Agency (EMA) sepsis criteria accurate for neonatal sepsis diagnosis or do we need new criteria? *PLoS One* **14**, e0218002–e0218002 (2019).
