# Supplementary material for: Patterns of antibiotic use, pathogens, and prediction of mortality in hospitalized neonates and young infants with sepsis: A global neonatal sepsis observational cohort study (NeoOBS)
Source: PLoS Med. 2023 Jun 8;20(6):e1004179. doi: 10.1371/journal.pmed.1004179 (PMC10249878; doi:10.1371/journal.pmed.1004179)
Supplement: S2 Dataset — (XLSX) [file pmed.1004179.s005.xlsx]

## Sheet: Sheet1
Child	Dataset source	Hospital identifier	Abdominal distension yesterday	Difficulty feeding yesterday	Evidence of shock yesterday	Jaundice requiring phototherapy yesterday	Respiratory signs yesterday	Grunting yesterday	Irritability yesterday	Hypotonia/floppiness yesterday	Cyanosis yesterday	Apnoea yesterday	Convulsions yesterday	Vomiting yesterday	Maximum ventilation support yesterday	Lethargy/no/reduced movement yesterday	Temperature yesterday (°C)	Temperature, Fractional polynomial term 1	Temperature, Fractional polynomial term 2	Analysis time when record begins	Analysis time when record ends	1 if failure; 0 if censored
1	Validation data	1	no	no	yes	yes	yes	no	no	no	no	no	no	no	Invasive ventilation	Neither	36.6	-15.504	-63.6117	0	0.5	0
1	Validation data	1	no	no	yes	yes	yes	no	no	no	no	no	no	no	Invasive ventilation	Neither	36.6	-15.504	-63.6117	0.5	1	0
1	Validation data	1	no	no	yes	yes	yes	no	no	no	no	no	no	no	Invasive ventilation	Neither	36.6	-15.504	-63.6117	1	2	0
1	Validation data	1	no	no	yes	yes	yes	no	no	no	no	no	no	no	Invasive ventilation	Neither	36.6	-15.504	-63.6117	2	3	0
1	Validation data	1	no	no	yes	no	yes	no	no	no	no	no	no	no	Invasive ventilation	Neither	37.5	51.1861	210.638	3	4	0
1	Validation data	1	no	no	yes	no	yes	no	no	no	no	no	no	no	Invasive ventilation	Neither	37.4	43.6962	179.757	4	5	0
1	Validation data	1	no	no	yes	no	yes	no	no	no	no	no	yes	no	Invasive ventilation	Neither	36.8	-0.82392	-3.38273	5	6	0
1	Validation data	1	no	no	yes	no	yes	no	no	no	no	no	no	no	Invasive ventilation	Neither	36.8	-0.82392	-3.38273	6	7	0
1	Validation data	1	no	no	yes	no	yes	no	no	no	no	no	no	no	Invasive ventilation	Neither	37	13.9361	57.2547	7	8	0
1	Validation data	1	no	no	no	no	yes	no	no	no	no	no	no	no	Invasive ventilation	Neither	36.6	-15.504	-63.6117	8	9	0
1	Validation data	1	no	no	yes	no	yes	no	no	no	no	no	no	no	Invasive ventilation	Neither	37.1	21.346	87.7262	9	10	0
1	Validation data	1	no	no	yes	no	yes	no	no	no	no	no	no	no	Invasive ventilation	Neither	37.3	36.2261	148.977	10	11	0
1	Validation data	1	no	no	yes	no	yes	no	no	no	no	no	no	no	Invasive ventilation	Neither	36.9	6.54625	26.8855	11	12	0
1	Validation data	1	no	no	yes	no	yes	no	no	no	no	no	no	no	Invasive ventilation	Neither	36.7	-8.17381	-33.5477	12	13	0
1	Validation data	1	no	no	yes	no	yes	no	no	yes	no	no	yes	no	Invasive ventilation	Lethargy only	36.6	-15.504	-63.6117	13	14	1
2	Derivation data	2	no	no	no	no	yes	no	yes	no	no	no	no	no	Invasive ventilation	Neither	36.9	6.54625	26.8855	0	0.5	0
2	Derivation data	2	no	no	no	no	yes	no	yes	no	no	no	no	no	Invasive ventilation	Neither	36.9	6.54625	26.8855	0.5	1	0
2	Derivation data	2	no	no	no	no	no	no	no	no	no	no	no	no	Invasive ventilation	Neither	37.4	43.6962	179.757	1	2	0
2	Derivation data	2	no	no	no	no	no	no	no	no	no	no	no	no	Invasive ventilation	Neither	37	13.9361	57.2547	2	3	0
2	Derivation data	2	no	no	no	no	no	no	no	no	no	no	no	no	CPAP, BiPAP, high flow nasal cannulae	Neither	37.2	28.7762	118.301	3	4	0
2	Derivation data	2	no	no	no	no	no	no	no	no	no	no	no	no	CPAP, BiPAP, high flow nasal cannulae	Neither	37.1	21.346	87.7262	4	5	0
2	Derivation data	2	no	no	no	no	no	no	no	no	no	no	no	no	None	Neither	36.7	-8.17381	-33.5477	5	6	0
2	Derivation data	2	no	no	no	no	no	no	no	no	no	no	no	no	None	Neither	37.4	43.6962	179.757	6	7	0
3	Derivation data	3	yes	no	no	yes	yes	no	no	no	no	no	no	no	CPAP, BiPAP, high flow nasal cannulae	Neither	38.1	96.546	398.079	0	0.5	0
3	Derivation data	3	yes	no	no	yes	yes	no	no	no	no	no	no	no	CPAP, BiPAP, high flow nasal cannulae	Neither	38.1	96.546	398.079	0.5	1	0
3	Derivation data	3	yes	no	no	yes	yes	no	no	no	no	no	no	no	CPAP, BiPAP, high flow nasal cannulae	Neither	38.1	96.546	398.079	1	2	0
3	Derivation data	3	yes	no	no	no	yes	no	no	no	no	no	no	no	CPAP, BiPAP, high flow nasal cannulae	Neither	37.2	28.7762	118.301	2	3	0
3	Derivation data	3	yes	no	no	no	yes	no	no	no	no	no	no	no	CPAP, BiPAP, high flow nasal cannulae	Neither	36.8	-0.82392	-3.38273	3	4	0
3	Derivation data	3	no	no	no	no	yes	no	no	no	no	no	no	no	CPAP, BiPAP, high flow nasal cannulae	Neither	37	13.9361	57.2547	4	5	0
3	Derivation data	3	yes	no	no	no	yes	no	no	no	no	no	no	no	Oxygen supplementation	Neither	36.3	-37.3739	-153.19	5	6	0
4	Derivation data	4	no	yes	no	no	no	no	yes	no	no	no	no	no	None	Neither	37.4	43.6962	179.757	0	0.5	0
4	Derivation data	4	no	yes	no	no	no	no	yes	no	no	no	no	no	None	Neither	37.4	43.6962	179.757	0.5	1	0
4	Derivation data	4	no	yes	no	no	no	yes	no	no	no	no	no	no	None	Neither	37	13.9361	57.2547	1	2	0
4	Derivation data	4	no	no	no	no	no	yes	no	no	no	no	no	no	None	Neither	36.9	6.54625	26.8855	2	3	0
4	Derivation data	4	no	no	no	no	no	yes	no	no	no	no	no	no	None	Neither	36.8	-0.82392	-3.38273	3	4	0
4	Derivation data	4	no	no	no	no	no	yes	no	no	no	no	no	no	None	Neither	36.8	-0.82392	-3.38273	4	5	0
4	Derivation data	4	no	no	no	no	no	yes	no	no	no	no	no	no	None	Neither	36.7	-8.17381	-33.5477	5	6	0
4	Derivation data	4	no	no	no	no	no	yes	no	no	no	no	no	no	None	Neither	37	13.9361	57.2547	6	7	0
4	Derivation data	4	no	no	no	no	no	yes	no	no	no	no	no	no	None	Neither	36.9	6.54625	26.8855	7	8	0
4	Derivation data	4	no	no	no	no	no	yes	no	no	no	no	no	no	None	Neither	36.7	-8.17381	-33.5477	8	9	0
4	Derivation data	4	no	no	no	no	no	no	no	no	no	no	no	no	None	Neither	36.9	6.54625	26.8855	9	10	0
4	Derivation data	4	no	no	no	no	no	no	no	no	no	no	no	no	None	Neither	36.7	-8.17381	-33.5477	10	11	0
4	Derivation data	4	no	no	no	no	no	no	no	no	no	no	no	no	None	Neither	37	13.9361	57.2547	11	12	0
4	Derivation data	4	no	no	no	no	no	no	no	no	no	no	no	no	None	Neither	36.7	-8.17381	-33.5477	12	13	0
4	Derivation data	4	no	no	no	no	no	no	no	no	no	no	no	no	None	Neither	36.8	-0.82392	-3.38273	13	14	0
5	Derivation data	4	yes	yes	no	yes	no	no	no	no	no	no	no	no	None	Neither	37	13.9361	57.2547	0	0.5	0
5	Derivation data	4	yes	yes	no	yes	no	no	no	no	no	no	no	no	None	Neither	37	13.9361	57.2547	0.5	1	0
5	Derivation data	4	yes	yes	no	yes	no	no	no	no	no	no	no	no	None	Neither	37	13.9361	57.2547	1	2	0
5	Derivation data	4	no	no	no	no	no	no	no	no	no	no	no	no	None	Neither	36.9	6.54625	26.8855	2	3	0
5	Derivation data	4	no	no	no	no	no	no	no	no	no	no	no	no	None	Neither	36.6	-15.504	-63.6117	3	4	0
5	Derivation data	4	no	no	no	no	no	no	no	no	no	no	no	no	None	Neither	36.5	-22.8139	-93.5726	4	5	0
5	Derivation data	4	no	no	no	no	no	no	no	no	no	no	no	no	None	Neither	36.7	-8.17381	-33.5477	5	6	0
5	Derivation data	4	no	no	no	no	no	no	no	no	no	no	no	no	None	Neither	36.7	-8.17381	-33.5477	6	7	0
5	Derivation data	4	no	no	no	no	no	no	no	no	no	no	no	no	None	Neither	36.9	6.54625	26.8855	7	8	0
5	Derivation data	4	no	no	no	no	no	no	no	no	no	no	no	no	None	Neither	36.9	6.54625	26.8855	8	9	0
5	Derivation data	4	no	no	no	no	no	no	no	no	no	no	no	no	None	Neither	36.9	6.54625	26.8855	9	10	0
5	Derivation data	4	no	no	no	no	no	no	no	no	no	no	no	no	None	Neither	36.8	-0.82392	-3.38273	10	11	0
5	Derivation data	4	no	no	no	no	no	no	no	no	no	no	no	no	None	Neither	36.6	-15.504	-63.6117	11	12	0
5	Derivation data	4	no	no	no	no	no	no	no	no	no	no	no	no	None	Neither	36.9	6.54625	26.8855	12	13	0
5	Derivation data	4	no	no	no	no	no	no	no	no	no	no	no	no	None	Neither	36.8	-0.82392	-3.38273	13	14	0
5	Derivation data	4	no	no	no	no	no	no	no	no	no	no	no	no	None	Neither	36.7	-8.17381	-33.5477	14	15	0
6	Derivation data	5	no	yes	no	no	yes	no	no	no	no	yes	no	no	CPAP, BiPAP, high flow nasal cannulae	Lethargy only	36.6	-15.504	-63.6117	0	0.5	0
6	Derivation data	5	no	yes	no	no	yes	no	no	no	no	yes	no	no	CPAP, BiPAP, high flow nasal cannulae	Lethargy only	36.6	-15.504	-63.6117	0.5	1	0
6	Derivation data	5	no	yes	no	no	yes	no	no	no	no	yes	no	no	CPAP, BiPAP, high flow nasal cannulae	Lethargy only	36.6	-15.504	-63.6117	1	2	0
6	Derivation data	5	no	yes	no	no	yes	no	no	no	no	yes	no	no	CPAP, BiPAP, high flow nasal cannulae	Lethargy only	36.4	-30.1038	-123.432	2	3	0
6	Derivation data	5	no	yes	no	no	yes	no	no	no	no	yes	no	no	CPAP, BiPAP, high flow nasal cannulae	Lethargy only	36.4	-30.1038	-123.432	3	4	0
6	Derivation data	5	no	no	no	no	no	no	no	no	no	no	no	no	None	Lethargy only	36.6	-15.504	-63.6117	4	5	0
6	Derivation data	5	no	no	no	no	no	no	no	no	no	no	no	no	None	Lethargy only	36.3	-37.3739	-153.19	5	6	0
6	Derivation data	5	no	no	no	no	no	no	no	no	no	no	no	no	None	Lethargy only	36.5	-22.8139	-93.5726	6	7	0
6	Derivation data	5	no	no	no	no	no	no	no	no	no	no	no	no	None	Neither	36.5	-22.8139	-93.5726	7	8	0
6	Derivation data	5	no	no	no	no	no	no	no	no	no	no	no	no	None	Neither	36.5	-22.8139	-93.5726	8	9	0
6	Derivation data	5	no	no	no	no	no	no	no	no	no	no	no	no	None	Neither	36.8	-0.82392	-3.38273	9	10	0
6	Derivation data	5	no	no	no	no	no	no	no	no	no	no	no	no	None	Neither	36.5	-22.8139	-93.5726	10	11	0
6	Derivation data	5	no	no	no	no	no	no	no	no	no	no	no	no	None	Neither	36.4	-30.1038	-123.432	11	12	0
6	Derivation data	5	no	no	no	no	no	no	no	no	no	no	no	no	None	Neither	36.8	-0.82392	-3.38273	12	13	0
6	Derivation data	5	no	no	no	no	no	no	no	no	no	no	no	no	None	Neither	36.6	-15.504	-63.6117	13	14	0
6	Derivation data	5	no	no	no	no	no	no	no	no	no	no	no	no	None	Neither	36.4	-30.1038	-123.432	14	15	0
6	Derivation data	5	no	no	no	no	no	no	no	no	no	no	no	no	None	Neither	36.6	-15.504	-63.6117	15	16	0
6	Derivation data	5	no	no	no	no	no	no	no	no	no	no	no	yes	None	Neither	36.8	-0.82392	-3.38273	16	17	0
6	Derivation data	5	no	no	no	no	no	no	no	no	no	no	no	no	None	Neither	36.8	-0.82392	-3.38273	17	18	0
6	Derivation data	5	no	no	no	no	no	no	no	no	no	no	no	no	None	Neither	36.4	-30.1038	-123.432	18	19	0
6	Derivation data	5	no	no	no	no	no	no	no	no	no	no	no	no	None	Neither	36.5	-22.8139	-93.5726	19	20	0
6	Derivation data	5	no	no	no	no	no	no	no	no	no	no	no	no	None	Neither	36.5	-22.8139	-93.5726	20	21	0
6	Derivation data	5	no	no	no	no	no	no	no	no	no	no	no	no	None	Neither	36.5	-22.8139	-93.5726	21	22	0
6	Derivation data	5	no	no	no	no	no	no	no	no	no	no	no	no	None	Neither	36.6	-15.504	-63.6117	22	23	0
6	Derivation data	5	no	no	no	no	no	no	no	no	no	no	no	no	None	Neither	36.5	-22.8139	-93.5726	23	24	0
6	Derivation data	5	no	no	no	no	no	no	no	no	no	no	no	no	None	Neither	36.5	-22.8139	-93.5726	24	25	0
6	Derivation data	5	no	no	no	no	no	no	no	no	no	no	no	no	None	Neither	36.4	-30.1038	-123.432	25	26	0
6	Derivation data	5	no	no	no	no	no	no	no	no	no	no	no	no	None	Neither	36.6	-15.504	-63.6117	26	27	0
6	Derivation data	5	no	no	no	no	no	no	no	no	no	no	no	no	None	Neither	36.6	-15.504	-63.6117	27	28	0
7	Derivation data	6	no	no	no	no	no	no	no	no	no	no	no	no	CPAP, BiPAP, high flow nasal cannulae	Neither	37	13.9361	57.2547	0	0.5	0
7	Derivation data	6	no	no	no	no	no	no	no	no	no	no	no	no	CPAP, BiPAP, high flow nasal cannulae	Neither	37	13.9361	57.2547	0.5	1	0
7	Derivation data	6	no	no	no	no	no	no	no	no	no	no	no	no	CPAP, BiPAP, high flow nasal cannulae	Neither	37	13.9361	57.2547	1	2	0
7	Derivation data	6	no	no	no	no	no	no	no	no	no	no	no	no	CPAP, BiPAP, high flow nasal cannulae	Neither	37	13.9361	57.2547	2	3	0
7	Derivation data	6	no	no	no	no	no	no	no	no	no	no	no	no	CPAP, BiPAP, high flow nasal cannulae	Neither	36.4	-30.1038	-123.432	3	4	0
7	Derivation data	6	no	no	no	no	no	no	no	no	no	no	no	no	CPAP, BiPAP, high flow nasal cannulae	Neither	36.5	-22.8139	-93.5726	4	5	0
7	Derivation data	6	no	no	no	no	no	no	no	no	no	no	no	no	None	Neither	36.6	-15.504	-63.6117	5	6	0
7	Derivation data	6	no	no	no	no	no	no	no	no	no	no	no	no	None	Neither	36.4	-30.1038	-123.432	6	7	0
8	Derivation data	7	no	no	no	no	no	no	no	no	no	no	no	no	None	Neither	36.7	-8.17381	-33.5477	0	0.5	0
8	Derivation data	7	no	no	no	no	no	no	no	no	no	no	no	no	None	Neither	36.7	-8.17381	-33.5477	0.5	1	0
8	Derivation data	7	no	no	no	no	no	no	no	no	no	no	no	no	None	Neither	36.8	-0.82392	-3.38273	1	2	0
8	Derivation data	7	no	no	no	yes	no	no	no	no	no	no	no	no	None	Neither	36.8	-0.82392	-3.38273	2	3	0
8	Derivation data	7	no	no	no	no	no	no	no	no	no	no	no	no	None	Neither	36.5	-22.8139	-93.5726	3	4	0
8	Derivation data	7	no	no	no	no	no	no	no	no	no	no	no	no	None	Neither	36.7	-8.17381	-33.5477	4	5	0
9	Validation data	8	yes	yes	no	no	yes	no	no	no	no	no	no	no	Oxygen supplementation	Neither	36.5	-22.8139	-93.5726	0	0.5	0
9	Validation data	8	yes	yes	no	no	yes	no	no	no	no	no	no	no	Oxygen supplementation	Neither	36.5	-22.8139	-93.5726	0.5	1	0
9	Validation data	8	no	no	no	no	yes	no	no	no	no	yes	no	no	None	Neither	37.2	28.7762	118.301	1	2	0
9	Validation data	8	no	no	no	yes	yes	no	no	no	no	yes	no	no	None	Neither	37	13.9361	57.2547	2	3	0
9	Validation data	8	no	no	no	yes	no	no	no	no	no	yes	no	yes	None	Neither	37.5	51.1861	210.638	3	4	0
9	Validation data	8	no	no	no	yes	no	no	no	no	no	no	no	no	Oxygen supplementation	Neither	37	13.9361	57.2547	4	5	0
9	Validation data	8	no	no	no	yes	no	no	no	no	no	no	no	no	Oxygen supplementation	Neither	37.5	51.1861	210.638	5	6	0
9	Validation data	8	no	no	no	yes	no	no	no	no	no	no	no	no	None	Neither	37.5	51.1861	210.638	6	7	0
9	Validation data	8	no	no	no	yes	no	no	no	no	no	no	no	no	None	Neither	37	13.9361	57.2547	7	8	0
9	Validation data	8	no	no	no	no	no	no	no	no	no	no	no	no	None	Neither	37	13.9361	57.2547	8	9	0
9	Validation data	8	no	no	no	no	no	no	no	no	no	no	no	no	None	Neither	37	13.9361	57.2547	9	10	0
9	Validation data	8	no	no	no	no	no	no	no	no	no	no	no	no	None	Neither	37	13.9361	57.2547	10	11	0
9	Validation data	8	no	no	no	no	no	no	no	no	no	no	no	no	None	Neither	37.5	51.1861	210.638	11	12	0
9	Validation data	8	no	no	no	no	no	no	no	no	no	no	no	no	None	Neither	37	13.9361	57.2547	12	13	0
9	Validation data	8	no	no	no	no	no	no	no	no	no	no	no	no	None	Neither	37	13.9361	57.2547	13	14	0
9	Validation data	8	no	no	no	no	no	no	no	no	no	no	no	no	None	Neither	37	13.9361	57.2547	14	15	0
10	Derivation data	2	no	no	yes	no	yes	no	no	yes	yes	no	no	no	CPAP, BiPAP, high flow nasal cannulae	Lethargy only	37.3	36.2261	148.977	0	0.5	0
10	Derivation data	2	no	no	yes	no	yes	no	no	yes	yes	no	no	no	CPAP, BiPAP, high flow nasal cannulae	Lethargy only	37.3	36.2261	148.977	0.5	1	0
10	Derivation data	2	yes	yes	no	no	yes	no	no	yes	no	no	no	yes	CPAP, BiPAP, high flow nasal cannulae	Lethargy only	37.3	36.2261	148.977	1	2	0
10	Derivation data	2	yes	yes	no	no	yes	no	no	yes	no	no	no	no	CPAP, BiPAP, high flow nasal cannulae	Lethargy only	37	13.9361	57.2547	2	3	0
10	Derivation data	2	yes	yes	no	no	yes	no	no	yes	no	no	no	no	CPAP, BiPAP, high flow nasal cannulae	Lethargy only	37.1	21.346	87.7262	3	4	0
10	Derivation data	2	no	yes	no	no	no	no	no	yes	no	no	no	no	CPAP, BiPAP, high flow nasal cannulae	Lethargy only	36.9	6.54625	26.8855	4	5	0
10	Derivation data	2	no	yes	no	no	no	no	no	yes	no	no	no	no	None	Lethargy only	37.3	36.2261	148.977	5	6	0
10	Derivation data	2	no	yes	no	no	no	no	no	yes	no	no	no	no	None	Lethargy only	37.4	43.6962	179.757	6	7	0
10	Derivation data	2	no	no	no	no	no	no	no	no	no	no	no	no	None	Neither	36.8	-0.82392	-3.38273	7	8	0
10	Derivation data	2	no	no	no	no	no	no	no	no	no	no	no	no	None	Neither	37.3	36.2261	148.977	8	9	0
10	Derivation data	2	no	no	no	no	no	no	no	no	no	no	no	no	None	Neither	36.9	6.54625	26.8855	9	10	0
11	Derivation data	3	no	yes	no	yes	no	no	yes	no	no	no	no	no	None	Neither	36.5	-22.8139	-93.5726	0	0.5	0
11	Derivation data	3	no	yes	no	yes	no	no	yes	no	no	no	no	no	None	Neither	36.5	-22.8139	-93.5726	0.5	1	0
11	Derivation data	3	no	no	no	no	no	no	no	no	no	no	no	no	None	Neither	36	-59.0639	-241.851	1	2	0
12	Validation data	9	yes	no	yes	no	yes	no	no	no	no	no	no	no	Invasive ventilation	Neither	37	13.9361	57.2547	0	0.5	0
12	Validation data	9	yes	no	yes	no	yes	no	no	no	no	no	no	no	Invasive ventilation	Neither	37	13.9361	57.2547	0.5	1	0
12	Validation data	9	yes	no	yes	no	yes	no	no	no	no	no	no	no	Invasive ventilation	Neither	37	13.9361	57.2547	1	2	0
12	Validation data	9	yes	no	yes	no	yes	no	no	no	no	no	no	no	Invasive ventilation	Neither	37	13.9361	57.2547	2	3	0
12	Validation data	9	no	no	yes	no	yes	no	no	no	no	no	no	no	Invasive ventilation	Neither	37	13.9361	57.2547	3	4	0
12	Validation data	9	no	no	yes	no	yes	no	no	no	no	no	no	no	Invasive ventilation	Neither	37	13.9361	57.2547	4	5	0
13	Derivation data	4	no	no	no	no	no	no	no	no	no	no	no	no	None	Lethargy only	36.5	-22.8139	-93.5726	0	0.5	0
13	Derivation data	4	no	no	no	no	no	no	no	no	no	no	no	no	None	Lethargy only	36.5	-22.8139	-93.5726	0.5	1	0
13	Derivation data	4	no	yes	no	no	no	no	no	no	no	no	no	no	None	Neither	36.9	6.54625	26.8855	1	2	0
13	Derivation data	4	no	no	no	no	no	no	no	no	no	no	no	no	None	Neither	36.6	-15.504	-63.6117	2	3	0
13	Derivation data	4	no	no	no	no	no	no	no	no	no	no	no	no	None	Neither	36.6	-15.504	-63.6117	3	4	0
13	Derivation data	4	no	no	no	no	no	no	no	no	no	no	no	no	None	Neither	36.7	-8.17381	-33.5477	4	5	0
13	Derivation data	4	no	no	no	no	no	no	no	no	no	no	no	no	None	Neither	36.7	-8.17381	-33.5477	5	6	0
13	Derivation data	4	no	no	no	no	no	no	no	no	no	no	no	no	None	Neither	36.4	-30.1038	-123.432	6	7	0
13	Derivation data	4	no	no	no	no	no	no	no	no	no	no	no	no	None	Neither	36.5	-22.8139	-93.5726	7	8	0
13	Derivation data	4	no	no	no	no	no	no	no	no	no	no	no	no	None	Neither	36.4	-30.1038	-123.432	8	9	0
13	Derivation data	4	no	no	no	no	no	no	no	no	no	no	no	no	None	Neither	36.5	-22.8139	-93.5726	9	10	0
13	Derivation data	4	no	no	no	no	no	no	no	no	no	no	no	no	None	Neither	36.7	-8.17381	-33.5477	10	11	0
13	Derivation data	4	no	no	no	no	no	no	no	no	no	no	no	no	None	Neither	37	13.9361	57.2547	11	12	0
13	Derivation data	4	no	no	no	no	no	no	no	no	no	no	no	no	None	Neither	36.9	6.54625	26.8855	12	13	0
13	Derivation data	4	no	no	no	no	no	no	no	no	no	no	no	no	None	Neither	36.7	-8.17381	-33.5477	13	14	0
13	Derivation data	4	no	no	no	no	no	no	no	no	no	no	no	no	None	Neither	36.5	-22.8139	-93.5726	14	15	0
13	Derivation data	4	no	no	no	no	no	no	no	no	no	no	no	no	None	Neither	36.6	-15.504	-63.6117	15	16	0
13	Derivation data	4	no	no	no	no	no	no	no	no	no	no	no	no	None	Neither	36.7	-8.17381	-33.5477	16	17	0
13	Derivation data	4	no	no	no	no	no	no	no	no	no	no	no	no	None	Neither	36.6	-15.504	-63.6117	17	18	0
13	Derivation data	4	no	no	no	no	no	no	no	no	no	no	no	no	None	Neither	36.5	-22.8139	-93.5726	18	19	0
13	Derivation data	4	no	no	no	no	no	no	no	no	no	no	no	no	None	Neither	36.6	-15.504	-63.6117	19	20	0
13	Derivation data	4	no	no	no	no	no	no	no	no	no	no	no	no	None	Neither	36.5	-22.8139	-93.5726	20	21	0
14	Derivation data	10	yes	no	no	no	yes	no	no	yes	no	no	no	no	Oxygen supplementation	Neither	37.7	66.2262	272.708	0	0.5	0
14	Derivation data	10	yes	no	no	no	yes	no	no	yes	no	no	no	no	Oxygen supplementation	Neither	37.7	66.2262	272.708	0.5	1	0
14	Derivation data	10	no	no	no	no	yes	no	no	no	no	no	no	no	Oxygen supplementation	Neither	36.4	-30.1038	-123.432	1	2	0
14	Derivation data	10	no	no	no	no	yes	no	no	no	no	no	no	no	Oxygen supplementation	Neither	35.8	-73.4239	-300.451	2	3	0
14	Derivation data	10	no	no	no	no	yes	no	no	no	no	no	no	no	Oxygen supplementation	Neither	35.8	-73.4239	-300.451	3	4	0
14	Derivation data	10	no	no	no	no	yes	no	no	no	no	no	no	no	Oxygen supplementation	Neither	35.8	-73.4239	-300.451	4	5	0
14	Derivation data	10	no	no	no	no	yes	no	no	no	no	no	no	no	Oxygen supplementation	Neither	36.8	-0.82392	-3.38273	5	6	0
14	Derivation data	10	no	no	no	no	yes	no	no	no	no	no	yes	no	Oxygen supplementation	Neither	37.6	58.696	241.621	6	7	0
14	Derivation data	10	no	no	no	no	yes	no	no	no	no	no	no	no	Oxygen supplementation	Neither	35.8	-73.4239	-300.451	7	8	0
14	Derivation data	10	no	no	no	no	no	no	no	no	no	no	no	no	None	Neither	35.8	-73.4239	-300.451	8	9	0
14	Derivation data	10	no	no	no	no	no	no	no	no	no	no	no	no	None	Neither	36.9	6.54625	26.8855	9	10	0
14	Derivation data	10	no	no	no	no	no	no	no	no	no	no	no	no	None	Neither	36	-59.0639	-241.851	10	13	0
15	Derivation data	5	yes	yes	no	no	yes	no	no	yes	no	no	no	no	Invasive ventilation	Lethargy only	36.5	-22.8139	-93.5726	0	0.5	0
15	Derivation data	5	yes	yes	no	no	yes	no	no	yes	no	no	no	no	Invasive ventilation	Lethargy only	36.5	-22.8139	-93.5726	0.5	1	0
15	Derivation data	5	yes	yes	no	no	yes	no	no	yes	no	no	no	no	Invasive ventilation	Lethargy only	36.5	-22.8139	-93.5726	1	2	0
15	Derivation data	5	yes	yes	no	no	yes	no	no	yes	no	no	no	no	Invasive ventilation	Lethargy only	36.5	-22.8139	-93.5726	2	3	0
15	Derivation data	5	yes	no	no	no	yes	no	no	yes	no	no	no	no	Invasive ventilation	Lethargy only	36.5	-22.8139	-93.5726	3	4	0
15	Derivation data	5	no	no	no	no	yes	no	no	no	no	no	no	no	Invasive ventilation	Lethargy only	36.5	-22.8139	-93.5726	4	5	0
15	Derivation data	5	yes	no	no	no	yes	no	no	no	no	no	no	no	Invasive ventilation	Lethargy only	36.5	-22.8139	-93.5726	5	6	0
15	Derivation data	5	no	yes	no	no	yes	no	no	no	no	no	no	no	Invasive ventilation	Lethargy only	36.7	-8.17381	-33.5477	6	7	0
15	Derivation data	5	yes	no	no	no	yes	no	no	no	no	no	no	no	Invasive ventilation	Lethargy only	36.5	-22.8139	-93.5726	7	8	0
15	Derivation data	5	yes	no	no	no	yes	no	no	yes	no	no	no	no	Invasive ventilation	Neither	36.6	-15.504	-63.6117	8	9	0
15	Derivation data	5	no	yes	no	no	yes	no	no	no	no	no	no	no	Invasive ventilation	Lethargy only	36.6	-15.504	-63.6117	9	10	0
15	Derivation data	5	yes	no	no	no	yes	no	no	no	no	no	no	no	Invasive ventilation	Lethargy only	36.5	-22.8139	-93.5726	10	11	0
15	Derivation data	5	no	no	no	no	yes	no	no	no	no	no	no	no	Invasive ventilation	Lethargy only	36.5	-22.8139	-93.5726	11	12	0
15	Derivation data	5	yes	no	no	no	yes	no	no	no	no	no	no	no	Invasive ventilation	Neither	36.5	-22.8139	-93.5726	12	13	0
15	Derivation data	5	yes	no	yes	no	yes	no	no	yes	no	no	no	no	Invasive ventilation	Lethargy only	36.4	-30.1038	-123.432	13	14	1
16	Derivation data	11	no	no	no	yes	no	no	no	no	no	no	no	no	None	Neither	36.9	6.54625	26.8855	0	0.5	0
16	Derivation data	11	no	no	no	yes	no	no	no	no	no	no	no	no	None	Neither	36.9	6.54625	26.8855	0.5	1	0
16	Derivation data	11	no	no	no	no	yes	no	no	no	no	no	no	no	None	Neither	37	13.9361	57.2547	1	2	0
16	Derivation data	11	no	no	no	yes	no	no	no	no	no	no	no	no	None	Neither	37	13.9361	57.2547	2	3	0
16	Derivation data	11	no	no	no	yes	no	no	no	no	no	no	no	no	None	Neither	37.2	28.7762	118.301	3	4	0
16	Derivation data	11	no	no	no	yes	no	no	no	no	no	no	no	no	None	Neither	37	13.9361	57.2547	4	5	0
17	Derivation data	12	no	yes	no	no	yes	no	no	no	yes	yes	no	no	Oxygen supplementation	Neither	36.3	-37.3739	-153.19	0	0.5	0
17	Derivation data	12	no	yes	no	no	yes	no	no	no	yes	yes	no	no	Oxygen supplementation	Neither	36.3	-37.3739	-153.19	0.5	1	0
17	Derivation data	12	no	yes	no	no	yes	no	no	no	yes	yes	no	no	Oxygen supplementation	Neither	36.3	-37.3739	-153.19	1	2	0
17	Derivation data	12	no	yes	no	no	yes	no	no	no	no	no	no	no	Oxygen supplementation	Neither	36.8	-0.82392	-3.38273	2	3	0
17	Derivation data	12	no	yes	no	no	yes	no	no	no	no	no	no	no	Oxygen supplementation	Neither	37	13.9361	57.2547	3	4	0
17	Derivation data	12	no	yes	no	no	yes	no	no	no	no	no	no	no	Oxygen supplementation	Neither	36.3	-37.3739	-153.19	4	5	0
17	Derivation data	12	no	no	no	no	no	no	no	no	no	no	no	no	None	Neither	37.1	21.346	87.7262	5	6	0
17	Derivation data	12	no	no	no	no	no	no	no	no	no	no	no	no	None	Neither	36.5	-22.8139	-93.5726	6	7	0
17	Derivation data	12	no	no	no	no	no	no	no	no	no	no	no	no	None	Neither	36.6	-15.504	-63.6117	7	8	0
18	Derivation data	13	yes	no	no	no	no	no	no	no	no	no	no	no	None	Lethargy only	38	88.9361	366.583	0	0.5	0
18	Derivation data	13	yes	no	no	no	no	no	no	no	no	no	no	no	None	Lethargy only	38	88.9361	366.583	0.5	1	0
18	Derivation data	13	yes	no	no	no	no	no	no	no	no	no	no	no	None	Lethargy only	38	88.9361	366.583	1	2	0
18	Derivation data	13	no	no	no	no	no	no	no	no	no	no	no	no	None	Lethargy only	37.6	58.696	241.621	2	3	0
18	Derivation data	13	no	no	no	no	no	no	no	no	no	no	no	no	None	Lethargy only	36.8	-0.82392	-3.38273	3	4	0
18	Derivation data	13	no	no	no	no	no	no	no	no	no	no	no	no	None	Neither	37.6	58.696	241.621	4	5	0
18	Derivation data	13	no	no	no	no	no	no	no	no	no	no	no	no	None	Neither	37	13.9361	57.2547	5	6	0
18	Derivation data	13	no	no	no	no	no	no	no	no	no	no	no	no	None	Neither	36.8	-0.82392	-3.38273	6	7	0
18	Derivation data	13	no	no	no	no	no	no	no	no	no	no	no	no	None	Neither	36.6	-15.504	-63.6117	7	8	0
18	Derivation data	13	no	no	no	no	no	no	no	no	no	no	no	no	None	Neither	36.8	-0.82392	-3.38273	8	9	0
18	Derivation data	13	no	no	no	no	no	no	no	no	no	no	no	no	None	Neither	36.8	-0.82392	-3.38273	9	10	0
18	Derivation data	13	no	no	no	no	no	no	no	no	no	no	no	no	None	Neither	36.8	-0.82392	-3.38273	10	11	0
18	Derivation data	13	no	no	no	no	no	no	no	no	no	no	no	no	None	Neither	36.7	-8.17381	-33.5477	11	12	0
18	Derivation data	13	no	no	no	no	no	no	no	no	no	no	no	no	None	Neither	36.6	-15.504	-63.6117	12	13	0
18	Derivation data	13	no	no	no	no	no	no	no	no	no	no	no	no	None	Neither	36.6	-15.504	-63.6117	13	14	0
18	Derivation data	13	no	no	no	no	no	no	no	no	no	no	no	no	None	Neither	36.8	-0.82392	-3.38273	14	15	0
18	Derivation data	13	no	yes	no	no	no	no	no	no	no	no	no	no	None	Lethargy only	36.8	-0.82392	-3.38273	15	16	0
18	Derivation data	13	yes	no	yes	no	yes	no	no	yes	yes	no	no	yes	Invasive ventilation	Reduced/no movement	36.6	-15.504	-63.6117	16	17	1
19	Derivation data	8	yes	yes	no	no	yes	no	no	no	no	no	no	yes	None	Neither	37	13.9361	57.2547	0	0.5	0
19	Derivation data	8	yes	yes	no	no	yes	no	no	no	no	no	no	yes	None	Neither	37	13.9361	57.2547	0.5	1	0
19	Derivation data	8	yes	no	no	no	no	no	no	no	no	no	no	yes	None	Neither	37.1	21.346	87.7262	1	2	0
19	Derivation data	8	no	no	no	no	no	no	no	no	no	no	no	no	None	Neither	37.1	21.346	87.7262	2	3	0
19	Derivation data	8	no	no	no	no	no	no	no	no	no	no	no	no	None	Neither	37.2	28.7762	118.301	3	4	0
19	Derivation data	8	no	no	no	no	no	no	no	no	no	no	no	no	None	Neither	37	13.9361	57.2547	4	5	0
19	Derivation data	8	yes	no	no	no	no	no	no	no	no	no	no	no	None	Neither	37	13.9361	57.2547	5	6	0
19	Derivation data	8	no	no	no	no	no	no	no	no	no	no	no	no	None	Neither	37.2	28.7762	118.301	6	7	0
19	Derivation data	8	no	no	no	no	no	no	no	no	no	no	no	no	None	Neither	37.1	21.346	87.7262	7	8	0
20	Derivation data	7	no	no	yes	no	yes	no	no	no	no	yes	no	no	Invasive ventilation	Neither	36.5	-22.8139	-93.5726	0	0.5	0
20	Derivation data	7	no	no	yes	no	yes	no	no	no	no	yes	no	no	Invasive ventilation	Neither	36.5	-22.8139	-93.5726	0.5	1	0
20	Derivation data	7	no	no	no	no	yes	no	no	no	no	no	no	no	Invasive ventilation	Neither	36.9	6.54625	26.8855	1	2	0
20	Derivation data	7	no	no	no	no	yes	no	no	no	no	no	no	no	Invasive ventilation	Neither	36.6	-15.504	-63.6117	2	3	0
20	Derivation data	7	no	no	no	no	yes	no	no	no	no	no	no	no	Invasive ventilation	Neither	37.1	21.346	87.7262	3	4	0
20	Derivation data	7	no	no	no	no	yes	no	no	no	no	no	no	no	Invasive ventilation	Neither	37.1	21.346	87.7262	4	5	0
20	Derivation data	7	no	no	no	no	no	no	no	no	no	no	no	no	None	Neither	36.7	-8.17381	-33.5477	5	6	0
20	Derivation data	7	no	no	no	no	no	no	no	no	no	no	no	no	None	Neither	37.1	21.346	87.7262	6	7	0
20	Derivation data	7	no	no	no	no	no	no	no	no	no	no	no	no	None	Neither	37.1	21.346	87.7262	7	8	0
20	Derivation data	7	no	no	no	no	no	no	no	no	no	no	no	no	None	Neither	36.6	-15.504	-63.6117	8	9	0
20	Derivation data	7	no	no	no	no	no	no	no	no	no	no	no	no	None	Neither	37	13.9361	57.2547	9	10	0
20	Derivation data	7	no	no	no	no	no	no	no	no	no	no	no	no	None	Neither	36.8	-0.82392	-3.38273	10	11	0
20	Derivation data	7	no	no	no	no	no	no	no	no	no	no	no	no	None	Neither	36.7	-8.17381	-33.5477	11	12	0
20	Derivation data	7	no	no	no	no	no	no	no	no	no	no	no	no	None	Neither	36.5	-22.8139	-93.5726	12	13	0
20	Derivation data	7	no	no	no	no	no	no	no	no	no	no	no	no	None	Neither	36.7	-8.17381	-33.5477	13	14	0
21	Derivation data	2	no	no	yes	no	yes	yes	no	no	yes	no	no	no	Invasive ventilation	Lethargy only	38.1	96.546	398.079	0	0.5	0
21	Derivation data	2	no	no	yes	no	yes	yes	no	no	yes	no	no	no	Invasive ventilation	Lethargy only	38.1	96.546	398.079	0.5	1	0
21	Derivation data	2	no	no	no	yes	no	no	no	no	no	no	no	no	Invasive ventilation	Neither	37.2	28.7762	118.301	1	2	0
21	Derivation data	2	no	no	no	no	no	no	no	no	no	no	no	no	Invasive ventilation	Neither	36.8	-0.82392	-3.38273	2	3	0
21	Derivation data	2	no	no	no	no	no	no	no	no	no	no	no	no	None	Neither	36.7	-8.17381	-33.5477	3	4	0
21	Derivation data	2	no	no	no	no	no	no	no	no	no	no	no	no	None	Neither	36.9	6.54625	26.8855	4	5	0
21	Derivation data	2	no	no	no	no	no	no	no	no	no	no	no	no	None	Neither	36.7	-8.17381	-33.5477	5	6	0
21	Derivation data	2	no	no	no	no	no	no	no	no	no	no	no	no	None	Neither	36.9	6.54625	26.8855	6	7	0
21	Derivation data	2	no	no	no	no	no	no	no	no	no	no	no	no	None	Neither	36.5	-22.8139	-93.5726	7	8	0
21	Derivation data	2	no	no	no	no	no	no	no	no	no	no	no	no	None	Neither	36.6	-15.504	-63.6117	8	9	0
21	Derivation data	2	no	no	no	no	no	no	no	no	no	no	no	no	None	Neither	36.7	-8.17381	-33.5477	9	10	0
21	Derivation data	2	no	no	no	no	no	no	no	no	no	no	no	no	None	Neither	36.5	-22.8139	-93.5726	10	11	0
21	Derivation data	2	no	no	no	no	no	no	no	no	no	no	no	no	None	Neither	36.8	-0.82392	-3.38273	11	12	0
21	Derivation data	2	no	no	no	no	no	no	no	no	no	no	no	no	None	Neither	36.6	-15.504	-63.6117	12	13	0
21	Derivation data	2	no	no	no	no	no	no	no	no	no	no	no	no	None	Neither	36.7	-8.17381	-33.5477	13	14	0
21	Derivation data	2	no	no	no	no	no	no	no	no	no	no	no	no	None	Neither	36.6	-15.504	-63.6117	14	15	0
21	Derivation data	2	no	no	no	no	no	no	no	no	no	no	no	no	None	Neither	36.7	-8.17381	-33.5477	15	16	0
21	Derivation data	2	no	no	no	no	no	no	no	no	no	no	no	no	None	Neither	36.6	-15.504	-63.6117	16	17	0
21	Derivation data	2	no	no	no	no	no	no	no	no	no	no	no	no	None	Neither	37.3	36.2261	148.977	17	18	0
21	Derivation data	2	no	no	no	no	no	no	no	no	no	no	no	no	None	Neither	37.2	28.7762	118.301	18	19	0
22	Derivation data	14	no	yes	no	no	yes	no	no	no	yes	yes	no	no	Oxygen supplementation	Lethargy only	36.4	-30.1038	-123.432	0	0.5	0
22	Derivation data	14	no	yes	no	no	yes	no	no	no	yes	yes	no	no	Oxygen supplementation	Lethargy only	36.4	-30.1038	-123.432	0.5	1	0
22	Derivation data	14	no	yes	no	no	yes	no	no	no	yes	yes	no	no	Oxygen supplementation	Lethargy only	36.4	-30.1038	-123.432	1	2	0
22	Derivation data	14	no	yes	no	no	yes	no	no	no	yes	yes	no	no	Oxygen supplementation	Lethargy only	36.4	-30.1038	-123.432	2	3	0
22	Derivation data	14	no	yes	no	no	yes	no	no	no	yes	yes	no	no	Oxygen supplementation	Lethargy only	36.4	-30.1038	-123.432	3	4	0
22	Derivation data	14	no	no	no	no	no	no	no	no	no	no	no	no	None	Neither	36.7	-8.17381	-33.5477	4	5	0
22	Derivation data	14	no	no	no	no	no	no	no	no	no	no	no	no	None	Neither	37.7	66.2262	272.708	5	6	0
23	Derivation data	13	no	yes	no	no	yes	no	no	no	no	no	no	no	Invasive ventilation	Neither	36.8	-0.82392	-3.38273	0	0.5	0
23	Derivation data	13	no	yes	no	no	yes	no	no	no	no	no	no	no	Invasive ventilation	Neither	36.8	-0.82392	-3.38273	0.5	1	0
23	Derivation data	13	no	yes	no	no	yes	no	no	no	no	no	no	no	Invasive ventilation	Neither	36.8	-0.82392	-3.38273	1	2	0
23	Derivation data	13	no	no	no	no	yes	no	no	no	no	no	no	no	Invasive ventilation	Neither	36.8	-0.82392	-3.38273	2	3	0
23	Derivation data	13	no	yes	no	no	yes	no	no	no	no	no	no	no	CPAP, BiPAP, high flow nasal cannulae	Neither	37.8	73.7761	303.896	3	4	0
23	Derivation data	13	no	no	no	no	yes	no	no	no	no	no	no	no	CPAP, BiPAP, high flow nasal cannulae	Neither	36.8	-0.82392	-3.38273	4	5	0
23	Derivation data	13	no	no	no	no	yes	no	no	no	no	no	no	no	CPAP, BiPAP, high flow nasal cannulae	Neither	36.6	-15.504	-63.6117	5	6	0
23	Derivation data	13	no	no	no	no	yes	no	no	no	no	no	no	no	CPAP, BiPAP, high flow nasal cannulae	Neither	36.8	-0.82392	-3.38273	6	7	0
23	Derivation data	13	no	no	no	yes	no	no	no	no	no	no	no	no	None	Neither	36.8	-0.82392	-3.38273	7	8	0
23	Derivation data	13	no	no	no	yes	no	no	no	no	no	no	no	no	None	Neither	36.8	-0.82392	-3.38273	8	9	0
23	Derivation data	13	no	no	no	yes	no	no	no	no	no	no	no	no	None	Neither	36.8	-0.82392	-3.38273	9	10	0
23	Derivation data	13	no	no	no	yes	no	no	no	no	no	no	no	no	None	Neither	36.8	-0.82392	-3.38273	10	11	0
23	Derivation data	13	no	no	no	yes	no	no	no	no	no	no	no	no	None	Neither	36.8	-0.82392	-3.38273	11	12	0
23	Derivation data	13	no	no	no	yes	no	no	no	no	no	no	no	no	None	Neither	36.8	-0.82392	-3.38273	12	13	0
23	Derivation data	13	no	no	no	no	no	no	no	no	no	no	no	no	None	Neither	36.8	-0.82392	-3.38273	13	14	0
23	Derivation data	13	no	no	no	no	no	no	no	no	no	no	no	no	None	Neither	36.8	-0.82392	-3.38273	14	15	0
23	Derivation data	13	no	no	no	no	no	no	no	no	no	no	no	no	None	Neither	36.8	-0.82392	-3.38273	15	16	0
23	Derivation data	13	no	no	no	no	no	no	no	no	no	no	no	no	None	Neither	36.6	-15.504	-63.6117	16	17	0
23	Derivation data	13	no	no	no	no	no	no	no	no	no	no	no	no	None	Neither	36.8	-0.82392	-3.38273	17	18	0
23	Derivation data	13	no	no	no	no	no	no	no	no	no	no	no	no	None	Neither	36.8	-0.82392	-3.38273	18	19	0
23	Derivation data	13	no	no	no	no	no	no	no	no	no	no	no	no	None	Neither	36.6	-15.504	-63.6117	19	20	0
23	Derivation data	13	no	no	no	no	no	no	no	no	no	no	no	no	None	Neither	37	13.9361	57.2547	20	21	0
23	Derivation data	13	no	no	no	no	no	no	no	no	no	no	no	no	None	Neither	36.8	-0.82392	-3.38273	21	22	0
23	Derivation data	13	no	no	no	no	no	no	no	no	no	no	no	no	None	Neither	36.6	-15.504	-63.6117	22	23	0
24	Derivation data	7	no	no	no	yes	yes	no	no	no	no	no	no	no	CPAP, BiPAP, high flow nasal cannulae	Neither	36.7	-8.17381	-33.5477	0	0.5	0
24	Derivation data	7	no	no	no	yes	yes	no	no	no	no	no	no	no	CPAP, BiPAP, high flow nasal cannulae	Neither	36.7	-8.17381	-33.5477	0.5	1	0
24	Derivation data	7	no	no	no	no	yes	no	no	no	no	no	no	no	CPAP, BiPAP, high flow nasal cannulae	Neither	37	13.9361	57.2547	1	2	0
24	Derivation data	7	no	no	no	yes	yes	no	no	no	no	no	no	no	CPAP, BiPAP, high flow nasal cannulae	Neither	37	13.9361	57.2547	2	3	0
24	Derivation data	7	no	no	no	yes	yes	no	no	no	no	no	no	no	CPAP, BiPAP, high flow nasal cannulae	Neither	36.8	-0.82392	-3.38273	3	4	0
24	Derivation data	7	no	no	no	no	yes	no	no	no	no	no	no	no	CPAP, BiPAP, high flow nasal cannulae	Neither	36.8	-0.82392	-3.38273	4	5	0
24	Derivation data	7	no	no	no	yes	yes	no	no	no	no	no	no	no	CPAP, BiPAP, high flow nasal cannulae	Neither	36.7	-8.17381	-33.5477	5	6	0
24	Derivation data	7	no	no	no	yes	yes	no	no	no	no	no	no	no	CPAP, BiPAP, high flow nasal cannulae	Neither	36.5	-22.8139	-93.5726	6	7	0
24	Derivation data	7	no	no	no	no	yes	no	no	no	no	no	no	no	CPAP, BiPAP, high flow nasal cannulae	Neither	36.8	-0.82392	-3.38273	7	8	0
24	Derivation data	7	no	no	no	yes	yes	no	no	no	no	no	no	no	CPAP, BiPAP, high flow nasal cannulae	Neither	37.1	21.346	87.7262	8	9	0
24	Derivation data	7	no	no	no	yes	yes	no	no	no	no	no	no	no	CPAP, BiPAP, high flow nasal cannulae	Neither	36.7	-8.17381	-33.5477	9	10	0
24	Derivation data	7	no	no	no	yes	yes	no	no	no	no	no	no	no	CPAP, BiPAP, high flow nasal cannulae	Neither	37.2	28.7762	118.301	10	11	0
24	Derivation data	7	no	no	no	yes	yes	no	no	no	no	no	no	no	CPAP, BiPAP, high flow nasal cannulae	Neither	36.6	-15.504	-63.6117	11	12	0
24	Derivation data	7	no	no	no	no	yes	no	no	no	no	no	no	no	None	Neither	36.7	-8.17381	-33.5477	12	13	0
24	Derivation data	7	no	no	no	yes	yes	no	no	no	no	no	no	no	CPAP, BiPAP, high flow nasal cannulae	Neither	36.7	-8.17381	-33.5477	13	14	0
25	Derivation data	2	yes	yes	no	no	yes	no	no	yes	no	no	no	no	CPAP, BiPAP, high flow nasal cannulae	Reduced/no movement	37.3	36.2261	148.977	0	0.5	0
25	Derivation data	2	yes	yes	no	no	yes	no	no	yes	no	no	no	no	CPAP, BiPAP, high flow nasal cannulae	Reduced/no movement	37.3	36.2261	148.977	0.5	1	0
25	Derivation data	2	yes	yes	no	no	yes	no	no	yes	no	no	no	no	CPAP, BiPAP, high flow nasal cannulae	Reduced/no movement	37.3	36.2261	148.977	1	2	0
25	Derivation data	2	yes	yes	no	no	yes	no	no	no	no	no	no	no	CPAP, BiPAP, high flow nasal cannulae	Lethargy only	37.2	28.7762	118.301	2	3	0
25	Derivation data	2	yes	yes	no	no	no	no	no	no	no	no	no	no	None	Lethargy only	36.6	-15.504	-63.6117	3	4	0
25	Derivation data	2	no	yes	no	no	no	no	no	no	no	no	no	no	None	Lethargy only	36.2	-44.6238	-182.845	4	5	0
25	Derivation data	2	no	no	no	no	no	no	no	no	no	no	no	no	None	Lethargy only	36.7	-8.17381	-33.5477	5	6	0
25	Derivation data	2	no	yes	no	no	no	no	no	no	no	no	no	no	None	Lethargy only	36.6	-15.504	-63.6117	6	7	0
25	Derivation data	2	no	no	no	no	no	no	no	no	no	no	no	no	None	Lethargy only	36.9	6.54625	26.8855	7	8	0
25	Derivation data	2	no	no	no	no	no	no	no	no	no	no	no	no	None	Lethargy only	36.9	6.54625	26.8855	8	9	0
25	Derivation data	2	no	no	no	no	no	no	no	no	no	no	no	no	None	Lethargy only	36.9	6.54625	26.8855	9	10	0
26	Validation data	8	no	no	no	no	yes	no	no	no	no	yes	no	no	CPAP, BiPAP, high flow nasal cannulae	Neither	37	13.9361	57.2547	0	0.5	0
26	Validation data	8	no	no	no	no	yes	no	no	no	no	yes	no	no	CPAP, BiPAP, high flow nasal cannulae	Neither	37	13.9361	57.2547	0.5	1	0
26	Validation data	8	no	no	no	no	yes	no	no	no	no	no	no	yes	CPAP, BiPAP, high flow nasal cannulae	Neither	37	13.9361	57.2547	1	2	0
26	Validation data	8	yes	no	no	no	yes	no	no	no	no	no	no	yes	CPAP, BiPAP, high flow nasal cannulae	Neither	37	13.9361	57.2547	2	3	0
26	Validation data	8	yes	no	no	no	yes	no	no	no	no	no	no	no	CPAP, BiPAP, high flow nasal cannulae	Neither	37	13.9361	57.2547	3	4	0
26	Validation data	8	no	no	no	no	yes	no	no	no	no	no	no	no	CPAP, BiPAP, high flow nasal cannulae	Neither	37	13.9361	57.2547	4	5	0
26	Validation data	8	no	no	no	no	no	no	no	no	no	no	no	no	CPAP, BiPAP, high flow nasal cannulae	Neither	37.1	21.346	87.7262	5	6	0
26	Validation data	8	no	no	no	no	yes	no	no	no	no	no	no	no	CPAP, BiPAP, high flow nasal cannulae	Neither	37.1	21.346	87.7262	6	7	0
26	Validation data	8	no	no	no	no	yes	no	no	no	no	no	no	no	Oxygen supplementation	Neither	37.2	28.7762	118.301	7	8	0
26	Validation data	8	no	no	no	no	yes	no	no	no	no	no	no	no	Oxygen supplementation	Neither	37	13.9361	57.2547	8	9	0
26	Validation data	8	no	no	no	no	yes	no	no	no	no	no	no	no	Oxygen supplementation	Neither	37	13.9361	57.2547	9	10	0
26	Validation data	8	no	no	no	no	yes	no	no	no	no	no	no	no	CPAP, BiPAP, high flow nasal cannulae	Neither	37	13.9361	57.2547	10	11	0
27	Validation data	6	no	yes	no	no	no	no	yes	no	no	no	no	no	None	Neither	36.9	6.54625	26.8855	0	0.5	0
27	Validation data	6	no	yes	no	no	no	no	yes	no	no	no	no	no	None	Neither	36.9	6.54625	26.8855	0.5	1	0
27	Validation data	6	no	yes	no	no	no	no	yes	no	no	no	no	no	None	Neither	36.9	6.54625	26.8855	1	2	0
27	Validation data	6	no	yes	no	no	no	no	yes	no	no	no	no	no	None	Neither	36.9	6.54625	26.8855	2	3	0
27	Validation data	6	no	no	no	no	no	no	no	no	no	no	no	no	None	Neither	36	-59.0639	-241.851	3	4	0
27	Validation data	6	no	no	no	no	no	no	no	no	no	no	no	no	None	Neither	36.7	-8.17381	-33.5477	4	5	0
27	Validation data	6	no	no	no	no	no	no	no	no	no	no	no	no	None	Neither	36	-59.0639	-241.851	5	6	0
28	Derivation data	13	no	no	no	no	no	no	no	no	no	no	no	no	None	Neither	38	88.9361	366.583	0	0.5	0
28	Derivation data	13	no	no	no	no	no	no	no	no	no	no	no	no	None	Neither	38	88.9361	366.583	0.5	1	0
28	Derivation data	13	no	no	no	no	no	no	no	no	no	no	no	no	None	Neither	38.6	134.896	557.107	1	2	0
28	Derivation data	13	no	no	no	no	no	no	no	no	no	no	no	no	None	Neither	37.6	58.696	241.621	2	3	0
28	Derivation data	13	no	no	no	no	no	no	no	no	no	no	no	no	None	Neither	37	13.9361	57.2547	3	4	0
28	Derivation data	13	no	no	no	no	no	no	no	no	no	no	no	no	None	Neither	37	13.9361	57.2547	4	5	0
28	Derivation data	13	no	no	no	no	no	no	no	no	no	no	no	no	None	Neither	37	13.9361	57.2547	5	6	0
28	Derivation data	13	no	no	no	no	no	no	no	no	no	no	no	no	None	Neither	37	13.9361	57.2547	6	7	0
28	Derivation data	13	no	no	no	no	no	no	no	no	no	no	no	no	None	Neither	37	13.9361	57.2547	7	8	0
28	Derivation data	13	no	no	no	no	no	no	no	no	no	no	no	no	None	Neither	37	13.9361	57.2547	8	9	0
28	Derivation data	13	no	no	no	no	no	no	no	no	no	no	no	no	None	Neither	37	13.9361	57.2547	9	10	0
28	Derivation data	13	no	no	no	no	no	no	no	no	no	no	no	no	None	Neither	37	13.9361	57.2547	10	11	0
28	Derivation data	13	no	no	no	no	no	no	no	no	no	no	no	no	None	Neither	37	13.9361	57.2547	11	12	0
28	Derivation data	13	no	no	no	no	no	no	no	no	no	no	no	no	None	Neither	37	13.9361	57.2547	12	13	0
28	Derivation data	13	no	no	no	no	yes	no	no	no	no	no	no	no	CPAP, BiPAP, high flow nasal cannulae	Neither	36.6	-15.504	-63.6117	13	14	0
28	Derivation data	13	no	no	no	no	yes	no	no	no	no	no	no	no	CPAP, BiPAP, high flow nasal cannulae	Neither	36.8	-0.82392	-3.38273	14	15	0
28	Derivation data	13	no	no	no	no	yes	no	no	no	no	no	no	no	CPAP, BiPAP, high flow nasal cannulae	Neither	36.8	-0.82392	-3.38273	15	16	0
28	Derivation data	13	no	no	no	no	yes	no	no	no	no	no	no	no	CPAP, BiPAP, high flow nasal cannulae	Neither	36.8	-0.82392	-3.38273	16	17	0
28	Derivation data	13	no	no	no	no	yes	no	no	no	no	no	no	no	CPAP, BiPAP, high flow nasal cannulae	Neither	36.8	-0.82392	-3.38273	17	18	0
28	Derivation data	13	no	no	no	no	no	no	no	no	no	no	no	no	None	Neither	37	13.9361	57.2547	18	19	0
28	Derivation data	13	no	no	no	no	no	no	no	no	no	no	no	no	None	Neither	37	13.9361	57.2547	19	20	0
28	Derivation data	13	no	no	no	no	no	no	no	no	no	no	no	no	None	Neither	37	13.9361	57.2547	20	21	0
28	Derivation data	13	no	no	no	no	no	no	no	no	no	no	no	no	None	Neither	36.8	-0.82392	-3.38273	21	22	0
28	Derivation data	13	no	no	no	no	no	no	no	no	no	no	no	no	None	Neither	37	13.9361	57.2547	22	23	0
28	Derivation data	13	no	no	no	no	no	no	no	no	no	no	no	no	None	Neither	36.8	-0.82392	-3.38273	23	24	0
28	Derivation data	13	no	no	no	no	no	no	no	no	no	no	no	no	None	Neither	36.6	-15.504	-63.6117	24	25	0
28	Derivation data	13	no	no	no	no	no	no	no	no	no	no	no	no	None	Neither	36.8	-0.82392	-3.38273	25	26	0
29	Derivation data	14	no	yes	no	yes	yes	no	no	no	no	yes	no	no	CPAP, BiPAP, high flow nasal cannulae	Neither	36.7	-8.17381	-33.5477	0	0.5	0
29	Derivation data	14	no	yes	no	yes	yes	no	no	no	no	yes	no	no	CPAP, BiPAP, high flow nasal cannulae	Neither	36.7	-8.17381	-33.5477	0.5	1	0
29	Derivation data	14	no	yes	no	yes	yes	no	no	no	no	yes	no	no	CPAP, BiPAP, high flow nasal cannulae	Neither	36.7	-8.17381	-33.5477	1	2	0
29	Derivation data	14	no	no	no	yes	yes	no	no	no	no	no	no	no	CPAP, BiPAP, high flow nasal cannulae	Neither	36.7	-8.17381	-33.5477	2	3	0
29	Derivation data	14	no	no	no	no	yes	no	no	no	no	no	no	no	Oxygen supplementation	Neither	36.6	-15.504	-63.6117	3	4	0
29	Derivation data	14	no	no	no	no	no	no	no	no	no	no	no	no	None	Neither	36.9	6.54625	26.8855	4	5	0
29	Derivation data	14	no	no	no	no	no	no	no	no	no	no	no	no	None	Neither	36.4	-30.1038	-123.432	5	6	0
29	Derivation data	14	no	no	no	no	no	no	no	no	no	no	no	no	None	Neither	36.2	-44.6238	-182.845	6	7	0
29	Derivation data	14	no	no	no	no	no	no	no	no	no	no	no	no	None	Neither	36.4	-30.1038	-123.432	7	8	0
29	Derivation data	14	no	no	no	no	no	no	no	no	no	no	no	no	None	Neither	36.8	-0.82392	-3.38273	8	9	0
29	Derivation data	14	no	no	no	no	no	no	no	no	no	no	no	no	None	Neither	36.6	-15.504	-63.6117	9	10	0
29	Derivation data	14	no	no	no	no	no	no	no	no	no	no	no	no	None	Neither	36.7	-8.17381	-33.5477	10	11	0
29	Derivation data	14	no	no	no	no	no	no	no	no	no	no	no	no	None	Neither	37.8	73.7761	303.896	11	12	0
29	Derivation data	14	no	no	no	no	no	no	no	no	no	no	no	no	None	Neither	36.5	-22.8139	-93.5726	12	13	0
29	Derivation data	14	no	no	no	no	no	no	no	no	no	no	no	no	None	Neither	37.2	28.7762	118.301	13	14	0
30	Derivation data	3	no	yes	yes	no	yes	no	no	no	no	no	no	no	CPAP, BiPAP, high flow nasal cannulae	Lethargy only	36.4	-30.1038	-123.432	0	0.5	1
31	Derivation data	15	no	no	no	yes	yes	no	no	yes	no	no	no	no	Invasive ventilation	Reduced/no movement	36.8	-0.82392	-3.38273	0	0.5	0
31	Derivation data	15	no	no	no	yes	yes	no	no	yes	no	no	no	no	Invasive ventilation	Reduced/no movement	36.8	-0.82392	-3.38273	0.5	1	0
31	Derivation data	15	no	no	no	yes	yes	no	no	yes	no	no	no	no	Invasive ventilation	Reduced/no movement	36.8	-0.82392	-3.38273	1	2	0
31	Derivation data	15	no	no	no	yes	yes	no	no	no	no	no	no	no	Invasive ventilation	Reduced/no movement	37.2	28.7762	118.301	2	3	0
31	Derivation data	15	no	yes	no	no	yes	no	no	no	no	no	no	no	Invasive ventilation	Reduced/no movement	36	-59.0639	-241.851	3	4	0
31	Derivation data	15	yes	yes	no	no	yes	no	no	no	no	no	no	no	Invasive ventilation	Neither	36.6	-15.504	-63.6117	4	5	1
32	Derivation data	4	yes	yes	yes	no	no	no	no	no	no	no	no	no	None	Neither	37.1	21.346	87.7262	0	0.5	0
32	Derivation data	4	yes	yes	yes	no	no	no	no	no	no	no	no	no	None	Neither	37.1	21.346	87.7262	0.5	1	0
32	Derivation data	4	yes	yes	no	no	no	no	no	no	no	no	no	no	None	Neither	36.6	-15.504	-63.6117	1	2	0
32	Derivation data	4	no	yes	no	no	no	no	no	no	no	no	no	no	None	Neither	37.1	21.346	87.7262	2	3	0
32	Derivation data	4	no	yes	no	no	no	no	no	no	no	no	no	no	None	Neither	36.7	-8.17381	-33.5477	3	4	0
32	Derivation data	4	no	yes	no	no	no	no	no	no	no	no	no	no	None	Neither	36.6	-15.504	-63.6117	4	5	0
32	Derivation data	4	no	yes	no	no	no	no	no	no	no	no	no	no	None	Neither	36.3	-37.3739	-153.19	5	6	0
32	Derivation data	4	no	yes	no	no	no	no	no	no	no	no	no	no	None	Neither	36.9	6.54625	26.8855	6	7	0
32	Derivation data	4	no	yes	no	no	no	no	no	no	no	no	no	no	None	Neither	36.7	-8.17381	-33.5477	7	8	0
32	Derivation data	4	no	yes	no	no	no	no	no	no	no	no	no	no	None	Neither	36.7	-8.17381	-33.5477	8	9	0
33	Derivation data	5	no	yes	no	no	yes	no	yes	no	no	no	no	no	Invasive ventilation	Lethargy only	36.4	-30.1038	-123.432	0	0.5	0
33	Derivation data	5	no	yes	no	no	yes	no	yes	no	no	no	no	no	Invasive ventilation	Lethargy only	36.4	-30.1038	-123.432	0.5	1	0
33	Derivation data	5	no	yes	no	no	yes	no	yes	no	no	no	no	no	Invasive ventilation	Lethargy only	36.4	-30.1038	-123.432	1	2	0
33	Derivation data	5	no	yes	no	no	yes	no	yes	no	no	no	no	no	Invasive ventilation	Lethargy only	36.3	-37.3739	-153.19	2	3	0
33	Derivation data	5	no	yes	no	no	no	no	no	no	no	no	no	no	Oxygen supplementation	Lethargy only	36.6	-15.504	-63.6117	3	4	0
33	Derivation data	5	no	yes	no	no	no	no	no	no	no	no	no	no	None	Lethargy only	36.4	-30.1038	-123.432	4	5	0
33	Derivation data	5	no	no	no	no	no	no	no	no	no	no	no	no	None	Neither	36.5	-22.8139	-93.5726	5	6	0
33	Derivation data	5	no	no	no	no	no	no	no	no	no	no	no	no	None	Neither	36.5	-22.8139	-93.5726	6	7	0
33	Derivation data	5	no	no	no	no	no	no	no	no	no	no	no	no	None	Neither	36.8	-0.82392	-3.38273	7	8	0
33	Derivation data	5	no	no	no	no	no	no	no	no	no	no	no	no	None	Neither	36.6	-15.504	-63.6117	8	9	0
33	Derivation data	5	no	no	no	no	no	no	no	no	no	no	no	no	None	Neither	36.8	-0.82392	-3.38273	9	10	0
33	Derivation data	5	no	no	no	no	no	no	yes	no	no	no	no	no	None	Neither	36.8	-0.82392	-3.38273	10	11	0
33	Derivation data	5	no	no	no	no	no	no	yes	no	no	no	no	no	None	Neither	36.6	-15.504	-63.6117	11	12	0
33	Derivation data	5	no	no	no	no	no	no	no	no	no	no	no	no	None	Neither	36.6	-15.504	-63.6117	12	13	0
33	Derivation data	5	no	no	no	no	no	no	no	no	no	no	no	no	None	Neither	36.6	-15.504	-63.6117	13	14	0
33	Derivation data	5	no	no	no	no	no	no	no	no	no	no	no	no	None	Neither	36.6	-15.504	-63.6117	14	15	0
34	Derivation data	10	no	no	no	no	no	no	no	no	no	no	no	no	None	Neither	38.9	158.146	653.762	0	0.5	0
34	Derivation data	10	no	no	no	no	no	no	no	no	no	no	no	no	None	Neither	38.9	158.146	653.762	0.5	1	0
34	Derivation data	10	no	no	no	no	no	no	no	no	no	no	no	no	None	Neither	38.2	104.176	429.68	1	2	0
34	Derivation data	10	no	no	no	no	no	no	no	no	no	no	no	no	None	Neither	36.2	-44.6238	-182.845	2	3	0
34	Derivation data	10	no	no	no	no	no	no	no	no	no	no	no	no	None	Neither	35.9	-66.2538	-271.201	3	4	0
35	Derivation data	8	no	no	no	no	yes	no	no	no	no	no	no	no	Oxygen supplementation	Neither	37.4	43.6962	179.757	0	0.5	0
35	Derivation data	8	no	no	no	no	yes	no	no	no	no	no	no	no	Oxygen supplementation	Neither	37.4	43.6962	179.757	0.5	1	0
35	Derivation data	8	no	no	no	no	no	no	no	no	no	no	no	no	Oxygen supplementation	Neither	37	13.9361	57.2547	1	2	0
35	Derivation data	8	no	no	no	no	no	no	no	no	no	no	no	no	None	Neither	37.3	36.2261	148.977	2	3	0
35	Derivation data	8	yes	no	no	no	no	no	no	no	no	no	no	no	Oxygen supplementation	Neither	37.4	43.6962	179.757	3	4	0
35	Derivation data	8	no	no	no	no	no	no	no	no	no	no	no	no	Oxygen supplementation	Neither	37.5	51.1861	210.638	4	5	0
35	Derivation data	8	no	no	no	no	no	no	no	no	no	no	no	no	Oxygen supplementation	Neither	37.5	51.1861	210.638	5	6	0
35	Derivation data	8	no	yes	no	no	no	no	no	no	no	no	no	no	Oxygen supplementation	Neither	37.5	51.1861	210.638	6	7	0
35	Derivation data	8	no	no	no	no	no	no	no	no	no	no	no	no	Oxygen supplementation	Neither	37.5	51.1861	210.638	7	8	0
35	Derivation data	8	no	no	no	no	yes	no	no	no	no	no	no	no	Oxygen supplementation	Neither	37.5	51.1861	210.638	8	9	0
35	Derivation data	8	no	no	no	no	yes	no	no	no	no	no	no	no	Oxygen supplementation	Neither	37.2	28.7762	118.301	9	10	0
36	Derivation data	10	no	no	no	no	no	no	no	no	no	no	no	no	None	Neither	37.9	81.3463	335.189	0	0.5	0
36	Derivation data	10	no	no	no	no	no	no	no	no	no	no	no	no	None	Neither	37.9	81.3463	335.189	0.5	1	0
36	Derivation data	10	no	no	no	no	no	no	no	no	no	no	no	no	None	Neither	37.9	81.3463	335.189	1	2	0
36	Derivation data	10	no	no	no	no	no	no	no	no	no	no	no	no	None	Neither	37	13.9361	57.2547	2	3	0
36	Derivation data	10	no	no	no	no	no	no	no	no	no	no	no	no	None	Neither	36.5	-22.8139	-93.5726	3	4	0
36	Derivation data	10	no	no	no	no	no	no	no	no	no	no	no	no	None	Neither	36.2	-44.6238	-182.845	4	5	0
36	Derivation data	10	no	no	no	no	no	no	no	no	no	no	no	no	None	Neither	36.6	-15.504	-63.6117	5	6	0
37	Derivation data	9	no	no	no	no	yes	no	no	no	no	no	no	no	CPAP, BiPAP, high flow nasal cannulae	Neither	36.9	6.54625	26.8855	0	0.5	0
37	Derivation data	9	no	no	no	no	yes	no	no	no	no	no	no	no	CPAP, BiPAP, high flow nasal cannulae	Neither	36.9	6.54625	26.8855	0.5	1	0
37	Derivation data	9	no	no	no	no	yes	no	no	no	no	no	no	no	CPAP, BiPAP, high flow nasal cannulae	Neither	36.9	6.54625	26.8855	1	2	0
37	Derivation data	9	no	no	no	no	yes	no	no	no	no	no	no	no	CPAP, BiPAP, high flow nasal cannulae	Neither	37	13.9361	57.2547	2	3	0
37	Derivation data	9	no	no	no	no	no	no	no	no	no	no	no	no	Oxygen supplementation	Neither	36.9	6.54625	26.8855	3	4	0
37	Derivation data	9	no	no	no	no	no	no	no	no	no	no	no	no	Oxygen supplementation	Neither	36.8	-0.82392	-3.38273	4	5	0
38	Derivation data	8	no	no	no	no	yes	yes	no	yes	yes	yes	no	no	Invasive ventilation	Neither	37.1	21.346	87.7262	0	0.5	0
38	Derivation data	8	no	no	no	no	yes	yes	no	yes	yes	yes	no	no	Invasive ventilation	Neither	37.1	21.346	87.7262	0.5	1	0
38	Derivation data	8	no	no	no	no	yes	no	no	no	no	no	no	no	Invasive ventilation	Neither	37.3	36.2261	148.977	1	2	0
38	Derivation data	8	no	no	no	no	yes	no	no	no	no	no	no	no	Invasive ventilation	Neither	37	13.9361	57.2547	2	3	0
38	Derivation data	8	no	no	no	yes	yes	no	no	no	no	no	no	no	Invasive ventilation	Neither	37	13.9361	57.2547	3	4	0
38	Derivation data	8	no	no	no	yes	yes	no	no	no	no	no	no	no	Invasive ventilation	Neither	37.2	28.7762	118.301	4	5	0
38	Derivation data	8	no	no	no	yes	yes	no	no	no	no	no	no	no	Invasive ventilation	Neither	37.4	43.6962	179.757	5	6	0
38	Derivation data	8	no	no	no	no	yes	no	no	no	no	no	no	no	Invasive ventilation	Neither	37.3	36.2261	148.977	6	7	0
38	Derivation data	8	no	no	no	yes	yes	no	no	no	no	no	no	no	Invasive ventilation	Neither	37.2	28.7762	118.301	7	8	0
38	Derivation data	8	no	no	no	yes	yes	no	no	no	no	no	no	no	Invasive ventilation	Neither	37	13.9361	57.2547	8	9	0
38	Derivation data	8	no	no	no	no	yes	no	no	no	no	no	no	no	CPAP, BiPAP, high flow nasal cannulae	Neither	37	13.9361	57.2547	9	10	0
38	Derivation data	8	no	no	no	no	yes	no	no	no	no	no	no	no	CPAP, BiPAP, high flow nasal cannulae	Neither	37	13.9361	57.2547	10	11	0
38	Derivation data	8	no	no	no	no	yes	no	no	no	no	no	no	no	CPAP, BiPAP, high flow nasal cannulae	Neither	37.5	51.1861	210.638	11	12	0
38	Derivation data	8	no	no	no	no	yes	no	no	no	no	no	no	no	Oxygen supplementation	Neither	37.5	51.1861	210.638	12	13	0
38	Derivation data	8	no	no	no	no	yes	no	no	no	no	no	no	no	Oxygen supplementation	Neither	37	13.9361	57.2547	13	14	0
38	Derivation data	8	no	no	no	no	yes	no	no	no	no	no	no	no	Oxygen supplementation	Neither	37	13.9361	57.2547	14	15	0
39	Derivation data	15	no	no	yes	yes	yes	no	no	no	no	yes	no	no	CPAP, BiPAP, high flow nasal cannulae	Neither	36.9	6.54625	26.8855	0	0.5	0
39	Derivation data	15	no	no	yes	yes	yes	no	no	no	no	yes	no	no	CPAP, BiPAP, high flow nasal cannulae	Neither	36.9	6.54625	26.8855	0.5	1	0
39	Derivation data	15	no	no	no	yes	yes	no	no	no	no	no	no	no	CPAP, BiPAP, high flow nasal cannulae	Neither	36.6	-15.504	-63.6117	1	2	0
39	Derivation data	15	no	no	no	yes	yes	no	no	no	no	no	no	no	CPAP, BiPAP, high flow nasal cannulae	Neither	36.5	-22.8139	-93.5726	2	3	0
39	Derivation data	15	no	no	no	no	yes	no	no	no	no	no	no	no	CPAP, BiPAP, high flow nasal cannulae	Neither	37	13.9361	57.2547	3	4	0
39	Derivation data	15	no	no	no	no	yes	no	no	no	no	no	no	no	CPAP, BiPAP, high flow nasal cannulae	Reduced/no movement	36.6	-15.504	-63.6117	4	5	0
39	Derivation data	15	no	no	no	no	yes	no	no	no	yes	yes	no	no	CPAP, BiPAP, high flow nasal cannulae	Reduced/no movement	36.8	-0.82392	-3.38273	5	6	0
39	Derivation data	15	no	no	no	no	no	no	no	no	no	no	no	no	CPAP, BiPAP, high flow nasal cannulae	Neither	36.8	-0.82392	-3.38273	6	7	0
39	Derivation data	15	no	no	no	no	yes	no	no	no	yes	yes	no	no	CPAP, BiPAP, high flow nasal cannulae	Neither	36.9	6.54625	26.8855	7	8	0
39	Derivation data	15	no	no	no	no	yes	no	no	no	no	no	no	no	CPAP, BiPAP, high flow nasal cannulae	Neither	37	13.9361	57.2547	8	9	0
39	Derivation data	15	no	no	no	no	yes	no	no	no	no	no	no	no	CPAP, BiPAP, high flow nasal cannulae	Neither	37.6	58.696	241.621	9	10	0
39	Derivation data	15	no	no	no	no	yes	no	no	no	no	no	no	no	CPAP, BiPAP, high flow nasal cannulae	Neither	36.8	-0.82392	-3.38273	10	11	0
39	Derivation data	15	no	no	no	no	yes	no	no	no	no	no	no	no	CPAP, BiPAP, high flow nasal cannulae	Neither	36.8	-0.82392	-3.38273	11	12	0
39	Derivation data	15	no	no	no	no	no	no	no	no	no	no	no	no	CPAP, BiPAP, high flow nasal cannulae	Neither	36.5	-22.8139	-93.5726	12	13	0
39	Derivation data	15	no	no	no	no	no	no	no	no	no	no	no	no	Oxygen supplementation	Neither	36.6	-15.504	-63.6117	13	14	0
39	Derivation data	15	no	no	no	no	yes	no	no	no	no	no	no	yes	Oxygen supplementation	Neither	37	13.9361	57.2547	14	15	0
40	Validation data	14	no	no	no	no	yes	yes	no	no	no	yes	no	no	CPAP, BiPAP, high flow nasal cannulae	Neither	36.7	-8.17381	-33.5477	0	0.5	0
40	Validation data	14	no	no	no	no	yes	yes	no	no	no	yes	no	no	CPAP, BiPAP, high flow nasal cannulae	Neither	36.7	-8.17381	-33.5477	0.5	1	0
40	Validation data	14	no	no	no	no	no	no	no	no	no	yes	no	no	CPAP, BiPAP, high flow nasal cannulae	Neither	36.6	-15.504	-63.6117	1	2	0
40	Validation data	14	no	no	no	no	yes	no	no	no	no	no	no	no	CPAP, BiPAP, high flow nasal cannulae	Neither	37.2	28.7762	118.301	2	3	0
40	Validation data	14	no	no	no	no	yes	no	no	no	no	no	no	no	CPAP, BiPAP, high flow nasal cannulae	Neither	36.6	-15.504	-63.6117	3	4	0
40	Validation data	14	no	no	no	no	no	no	no	no	no	no	no	no	None	Neither	36.9	6.54625	26.8855	4	5	0
40	Validation data	14	no	no	no	yes	no	no	no	no	no	no	no	no	None	Neither	36.7	-8.17381	-33.5477	5	6	0
40	Validation data	14	no	no	no	no	no	no	no	no	no	no	no	no	None	Neither	36.5	-22.8139	-93.5726	6	7	0
41	Derivation data	7	no	no	yes	yes	yes	no	no	yes	yes	no	no	no	Invasive ventilation	Lethargy only	37.1	21.346	87.7262	0	0.5	0
41	Derivation data	7	no	no	yes	yes	yes	no	no	yes	yes	no	no	no	Invasive ventilation	Lethargy only	37.1	21.346	87.7262	0.5	1	0
41	Derivation data	7	no	no	yes	yes	yes	no	no	no	no	no	no	no	Invasive ventilation	Neither	36.4	-30.1038	-123.432	1	2	0
41	Derivation data	7	no	no	yes	yes	yes	no	no	no	no	no	no	no	Invasive ventilation	Neither	37.1	21.346	87.7262	2	3	0
41	Derivation data	7	no	no	yes	yes	yes	no	no	no	no	no	no	no	Invasive ventilation	Neither	36.5	-22.8139	-93.5726	3	4	0
41	Derivation data	7	no	no	yes	yes	yes	no	no	no	no	no	no	no	Invasive ventilation	Neither	36.7	-8.17381	-33.5477	4	5	0
41	Derivation data	7	no	no	no	no	yes	no	no	no	no	no	no	no	Invasive ventilation	Neither	37	13.9361	57.2547	5	6	0
41	Derivation data	7	no	no	no	yes	yes	no	no	no	no	no	no	no	Invasive ventilation	Neither	37	13.9361	57.2547	6	7	0
41	Derivation data	7	no	no	no	no	yes	no	no	no	no	no	no	no	CPAP, BiPAP, high flow nasal cannulae	Neither	37	13.9361	57.2547	7	8	0
41	Derivation data	7	no	no	no	yes	yes	no	no	no	no	no	no	no	CPAP, BiPAP, high flow nasal cannulae	Neither	36.7	-8.17381	-33.5477	8	9	0
41	Derivation data	7	no	no	no	no	yes	no	no	no	no	no	no	no	CPAP, BiPAP, high flow nasal cannulae	Neither	37	13.9361	57.2547	9	10	0
41	Derivation data	7	no	no	no	no	yes	no	no	no	no	no	no	no	CPAP, BiPAP, high flow nasal cannulae	Neither	36.8	-0.82392	-3.38273	10	11	0
41	Derivation data	7	no	no	no	no	yes	no	no	no	no	no	no	no	CPAP, BiPAP, high flow nasal cannulae	Neither	36.8	-0.82392	-3.38273	11	12	0
41	Derivation data	7	no	no	no	yes	yes	no	no	no	no	no	no	no	CPAP, BiPAP, high flow nasal cannulae	Neither	36.8	-0.82392	-3.38273	12	13	0
41	Derivation data	7	no	no	no	no	yes	no	no	no	no	no	no	no	CPAP, BiPAP, high flow nasal cannulae	Neither	36.5	-22.8139	-93.5726	13	14	0
42	Validation data	1	yes	no	yes	no	yes	no	no	no	no	no	no	no	Invasive ventilation	Lethargy only	37.3	36.2261	148.977	0	0.5	0
42	Validation data	1	yes	no	yes	no	yes	no	no	no	no	no	no	no	Invasive ventilation	Lethargy only	37.3	36.2261	148.977	0.5	1	0
42	Validation data	1	yes	no	yes	no	yes	no	no	no	no	no	no	no	Invasive ventilation	Lethargy only	37.3	36.2261	148.977	1	2	0
42	Validation data	1	no	no	yes	no	yes	no	yes	no	no	no	no	no	Invasive ventilation	Lethargy only	36.8	-0.82392	-3.38273	2	3	0
42	Validation data	1	no	no	no	no	yes	no	no	no	no	no	no	no	CPAP, BiPAP, high flow nasal cannulae	Neither	36.7	-8.17381	-33.5477	3	4	0
42	Validation data	1	no	no	no	no	no	no	no	no	no	no	no	no	None	Neither	36.8	-0.82392	-3.38273	4	5	0
42	Validation data	1	no	no	no	no	no	no	no	no	no	no	no	no	None	Neither	36.6	-15.504	-63.6117	5	6	0
42	Validation data	1	no	no	no	no	no	no	no	no	no	no	no	no	None	Neither	36.8	-0.82392	-3.38273	6	7	0
42	Validation data	1	no	no	no	no	no	no	no	no	no	no	no	no	None	Neither	36.8	-0.82392	-3.38273	7	8	0
42	Validation data	1	no	no	no	no	no	no	no	no	no	no	no	no	None	Neither	36.5	-22.8139	-93.5726	8	9	0
42	Validation data	1	no	no	no	no	no	no	no	no	no	no	no	no	None	Neither	36.6	-15.504	-63.6117	9	10	0
42	Validation data	1	no	no	no	no	no	no	no	no	no	no	no	no	None	Neither	36.5	-22.8139	-93.5726	10	11	0
42	Validation data	1	no	no	no	no	no	no	no	no	no	no	no	no	None	Neither	36.6	-15.504	-63.6117	11	12	0
42	Validation data	1	no	no	no	no	no	no	no	no	no	no	no	no	None	Neither	36.6	-15.504	-63.6117	12	13	0
42	Validation data	1	no	no	no	no	no	no	no	no	no	no	no	no	None	Neither	36.5	-22.8139	-93.5726	13	14	0
42	Validation data	1	no	no	no	no	no	no	no	no	no	no	no	no	None	Neither	36.5	-22.8139	-93.5726	14	15	0
42	Validation data	1	no	no	no	no	no	no	no	no	no	no	no	no	None	Neither	36.6	-15.504	-63.6117	15	16	0
42	Validation data	1	no	no	no	no	no	no	no	no	no	no	no	no	None	Neither	36.5	-22.8139	-93.5726	16	17	0
42	Validation data	1	no	no	no	no	no	no	no	no	no	no	no	no	None	Neither	36.5	-22.8139	-93.5726	17	18	0
42	Validation data	1	no	no	no	no	no	no	no	no	no	no	no	no	None	Neither	36.5	-22.8139	-93.5726	18	19	0
42	Validation data	1	no	no	no	no	no	no	no	no	no	no	no	no	None	Neither	36.5	-22.8139	-93.5726	19	20	0
42	Validation data	1	no	no	no	no	no	no	no	no	no	no	no	no	None	Neither	36.5	-22.8139	-93.5726	20	21	0
42	Validation data	1	no	no	no	no	no	no	no	no	no	no	no	no	None	Neither	36.5	-22.8139	-93.5726	21	22	0
43	Derivation data	12	yes	yes	yes	no	yes	yes	no	no	no	no	no	no	Oxygen supplementation	Lethargy only	37.2	28.7762	118.301	0	0.5	0
43	Derivation data	12	yes	yes	yes	no	yes	yes	no	no	no	no	no	no	Oxygen supplementation	Lethargy only	37.2	28.7762	118.301	0.5	1	0
43	Derivation data	12	yes	yes	yes	no	yes	yes	no	no	no	no	no	no	Oxygen supplementation	Lethargy only	37.2	28.7762	118.301	1	2	0
43	Derivation data	12	yes	yes	no	no	yes	no	no	no	no	no	no	no	Oxygen supplementation	Lethargy only	37	13.9361	57.2547	2	3	0
43	Derivation data	12	yes	yes	no	no	yes	no	no	no	no	no	no	no	Oxygen supplementation	Neither	38.1	96.546	398.079	3	4	0
43	Derivation data	12	yes	yes	no	no	no	no	no	no	no	no	no	no	None	Neither	36.5	-22.8139	-93.5726	4	5	0
43	Derivation data	12	yes	yes	no	no	no	no	no	no	no	no	no	no	None	Neither	37.4	43.6962	179.757	5	6	0
43	Derivation data	12	yes	yes	no	no	no	no	no	no	no	no	no	no	None	Neither	36.7	-8.17381	-33.5477	6	7	0
43	Derivation data	12	no	yes	no	no	no	no	no	no	no	no	no	no	None	Neither	36.8	-0.82392	-3.38273	7	8	0
43	Derivation data	12	no	yes	no	no	no	no	no	no	no	no	no	no	None	Neither	37.3	36.2261	148.977	8	9	0
43	Derivation data	12	no	yes	no	no	no	no	no	no	no	no	no	no	None	Neither	37.2	28.7762	118.301	9	10	0
43	Derivation data	12	no	yes	no	no	no	no	no	no	no	no	no	no	None	Neither	36.8	-0.82392	-3.38273	10	11	0
43	Derivation data	12	no	yes	no	no	no	no	no	no	no	no	no	no	None	Neither	37.2	28.7762	118.301	11	12	0
43	Derivation data	12	no	no	no	no	no	no	no	no	no	no	no	no	None	Neither	36.6	-15.504	-63.6117	12	13	0
43	Derivation data	12	no	no	no	no	no	no	no	no	no	no	no	no	None	Neither	36.5	-22.8139	-93.5726	13	14	0
43	Derivation data	12	no	no	no	no	no	no	no	no	no	no	no	no	None	Neither	36.8	-0.82392	-3.38273	14	15	0
43	Derivation data	12	no	no	no	no	no	no	no	no	no	no	no	no	None	Neither	36.4	-30.1038	-123.432	15	16	0
43	Derivation data	12	no	no	no	no	no	no	no	no	no	no	no	no	None	Neither	36.5	-22.8139	-93.5726	16	17	0
44	Derivation data	12	no	no	no	no	yes	yes	yes	no	yes	no	no	no	Oxygen supplementation	Lethargy only	39	165.936	686.185	0	0.5	0
44	Derivation data	12	no	no	no	no	yes	yes	yes	no	yes	no	no	no	Oxygen supplementation	Lethargy only	39	165.936	686.185	0.5	1	0
44	Derivation data	12	no	no	no	no	yes	yes	yes	no	yes	no	no	no	Oxygen supplementation	Lethargy only	39	165.936	686.185	1	2	0
44	Derivation data	12	no	yes	no	no	no	no	yes	no	no	no	no	no	None	Neither	37	13.9361	57.2547	2	3	0
44	Derivation data	12	no	no	no	no	no	no	no	no	no	no	no	no	None	Neither	37.3	36.2261	148.977	3	4	0
44	Derivation data	12	no	no	no	no	no	no	no	no	no	no	no	no	None	Neither	36.6	-15.504	-63.6117	4	5	0
44	Derivation data	12	no	no	no	no	no	no	no	no	no	no	no	no	None	Neither	36.5	-22.8139	-93.5726	5	6	0
44	Derivation data	12	no	no	no	no	no	no	no	no	no	no	no	no	None	Neither	37	13.9361	57.2547	6	7	0
44	Derivation data	12	no	no	no	no	no	no	no	no	no	no	no	no	None	Neither	36.7	-8.17381	-33.5477	7	8	0
44	Derivation data	12	no	no	no	no	no	no	no	no	no	no	no	no	None	Neither	36.5	-22.8139	-93.5726	8	9	0
44	Derivation data	12	no	no	no	no	no	no	no	no	no	no	no	no	None	Neither	36.8	-0.82392	-3.38273	9	10	0
45	Derivation data	5	yes	yes	yes	no	yes	yes	no	yes	no	no	no	no	Invasive ventilation	Lethargy only	36.4	-30.1038	-123.432	0	0.5	0
45	Derivation data	5	yes	yes	yes	no	yes	yes	no	yes	no	no	no	no	Invasive ventilation	Lethargy only	36.4	-30.1038	-123.432	0.5	1	0
45	Derivation data	5	yes	yes	yes	no	yes	yes	no	yes	no	no	no	no	Invasive ventilation	Lethargy only	36.4	-30.1038	-123.432	1	2	1
46	Derivation data	8	no	no	no	no	yes	no	no	no	no	no	no	no	Oxygen supplementation	Neither	37	13.9361	57.2547	0	0.5	0
46	Derivation data	8	no	no	no	no	yes	no	no	no	no	no	no	no	Oxygen supplementation	Neither	37	13.9361	57.2547	0.5	1	0
46	Derivation data	8	no	no	no	yes	no	no	no	no	no	no	no	no	None	Neither	37.2	28.7762	118.301	1	2	0
46	Derivation data	8	no	no	no	yes	no	no	no	no	no	no	no	no	None	Neither	37	13.9361	57.2547	2	3	0
46	Derivation data	8	no	no	no	no	no	no	no	no	no	no	no	no	None	Neither	37.5	51.1861	210.638	3	4	0
46	Derivation data	8	no	no	no	no	no	no	no	no	no	no	no	no	None	Neither	37	13.9361	57.2547	4	5	0
46	Derivation data	8	no	no	no	no	no	no	no	no	no	no	no	no	None	Neither	37.3	36.2261	148.977	5	6	0
46	Derivation data	8	no	no	no	no	no	no	no	no	no	no	no	no	None	Neither	37.3	36.2261	148.977	6	7	0
47	Derivation data	10	no	yes	no	no	no	no	no	no	no	no	no	no	None	Neither	36.4	-30.1038	-123.432	0	0.5	0
47	Derivation data	10	no	yes	no	no	no	no	no	no	no	no	no	no	None	Neither	36.4	-30.1038	-123.432	0.5	1	0
47	Derivation data	10	no	yes	no	no	no	no	no	no	no	no	no	no	None	Neither	36.4	-30.1038	-123.432	1	2	0
47	Derivation data	10	no	yes	no	no	no	no	no	no	no	no	no	no	None	Neither	36.4	-30.1038	-123.432	2	3	0
48	Derivation data	8	no	no	no	no	no	no	no	no	no	no	no	no	None	Neither	37.2	28.7762	118.301	0	0.5	0
48	Derivation data	8	no	no	no	no	no	no	no	no	no	no	no	no	None	Neither	37.2	28.7762	118.301	0.5	1	0
48	Derivation data	8	no	no	no	no	no	no	no	no	no	no	no	no	None	Neither	37.5	51.1861	210.638	1	2	0
48	Derivation data	8	no	no	no	no	no	no	no	no	no	no	no	no	None	Neither	37.3	36.2261	148.977	2	3	0
48	Derivation data	8	no	no	no	no	no	no	no	no	no	no	no	no	None	Neither	37.1	21.346	87.7262	3	4	0
48	Derivation data	8	no	no	no	no	no	no	no	no	no	no	no	no	None	Neither	37.2	28.7762	118.301	4	5	0
48	Derivation data	8	no	no	no	no	no	no	no	no	no	no	no	no	None	Neither	37.3	36.2261	148.977	5	6	0
48	Derivation data	8	no	no	no	no	no	no	no	no	no	no	no	no	None	Neither	37.4	43.6962	179.757	6	7	0
48	Derivation data	8	no	no	no	no	no	no	no	no	no	no	no	no	None	Neither	37.3	36.2261	148.977	7	8	0
48	Derivation data	8	no	no	no	no	no	no	no	no	no	no	no	no	None	Neither	37.3	36.2261	148.977	8	9	0
48	Derivation data	8	no	no	no	no	no	no	no	no	no	no	no	no	None	Neither	37	13.9361	57.2547	9	10	0
48	Derivation data	8	no	no	no	no	no	no	no	no	no	no	no	no	None	Neither	37	13.9361	57.2547	10	11	0
48	Derivation data	8	no	no	no	no	no	no	no	no	no	no	no	no	None	Neither	37	13.9361	57.2547	11	12	0
48	Derivation data	8	no	no	no	no	no	no	no	no	no	no	no	no	None	Neither	37.1	21.346	87.7262	12	13	0
48	Derivation data	8	no	no	no	no	no	no	no	no	no	no	no	no	None	Neither	37	13.9361	57.2547	13	14	0
48	Derivation data	8	no	no	no	no	no	no	no	no	no	no	no	no	None	Neither	37.2	28.7762	118.301	14	15	0
48	Derivation data	8	no	no	no	no	no	no	no	no	no	no	no	no	None	Neither	37	13.9361	57.2547	15	16	0
49	Derivation data	14	no	no	no	no	yes	yes	no	no	no	no	no	no	Invasive ventilation	Neither	36.8	-0.82392	-3.38273	0	0.5	0
49	Derivation data	14	no	no	no	no	yes	yes	no	no	no	no	no	no	Invasive ventilation	Neither	36.8	-0.82392	-3.38273	0.5	1	0
49	Derivation data	14	no	no	no	no	yes	yes	no	no	no	no	no	no	Invasive ventilation	Neither	36.8	-0.82392	-3.38273	1	2	0
49	Derivation data	14	no	no	no	no	yes	no	no	no	no	no	no	yes	Oxygen supplementation	Neither	36.7	-8.17381	-33.5477	2	3	0
49	Derivation data	14	no	no	no	no	yes	no	no	no	no	no	no	no	Oxygen supplementation	Neither	36.5	-22.8139	-93.5726	3	4	0
49	Derivation data	14	no	no	no	no	no	no	no	no	no	no	no	no	None	Neither	36.8	-0.82392	-3.38273	4	5	0
49	Derivation data	14	no	no	no	no	no	no	no	no	no	no	no	no	None	Neither	37.5	51.1861	210.638	5	6	0
49	Derivation data	14	no	no	no	no	no	no	no	no	no	no	no	no	None	Neither	36.6	-15.504	-63.6117	6	7	0
50	Derivation data	6	no	no	no	no	no	no	no	no	no	no	no	no	CPAP, BiPAP, high flow nasal cannulae	Neither	36.5	-22.8139	-93.5726	0	0.5	0
50	Derivation data	6	no	no	no	no	no	no	no	no	no	no	no	no	CPAP, BiPAP, high flow nasal cannulae	Neither	36.5	-22.8139	-93.5726	0.5	1	0
50	Derivation data	6	no	no	no	no	no	no	no	no	no	no	no	no	CPAP, BiPAP, high flow nasal cannulae	Neither	36.5	-22.8139	-93.5726	1	2	0
50	Derivation data	6	no	no	no	no	no	no	no	no	no	no	no	no	CPAP, BiPAP, high flow nasal cannulae	Neither	36.5	-22.8139	-93.5726	2	3	0
50	Derivation data	6	no	no	no	no	no	no	no	no	no	no	no	no	CPAP, BiPAP, high flow nasal cannulae	Neither	37.2	28.7762	118.301	3	4	0
50	Derivation data	6	no	no	no	no	no	no	no	no	no	no	no	no	CPAP, BiPAP, high flow nasal cannulae	Lethargy only	36.8	-0.82392	-3.38273	4	5	0
50	Derivation data	6	no	no	no	no	no	no	no	no	no	no	no	no	CPAP, BiPAP, high flow nasal cannulae	Lethargy only	36.4	-30.1038	-123.432	5	6	0
50	Derivation data	6	no	no	no	no	no	no	no	no	no	no	no	no	CPAP, BiPAP, high flow nasal cannulae	Neither	36.4	-30.1038	-123.432	6	7	0
50	Derivation data	6	no	no	no	no	no	no	no	no	no	no	no	no	None	Neither	37	13.9361	57.2547	7	8	0
50	Derivation data	6	no	no	no	no	no	no	no	no	no	no	no	no	None	Neither	36.8	-0.82392	-3.38273	8	9	0
50	Derivation data	6	no	no	no	no	no	no	no	no	no	no	no	no	None	Neither	36.3	-37.3739	-153.19	9	10	0
51	Derivation data	2	no	no	yes	no	yes	yes	no	yes	yes	yes	no	no	Invasive ventilation	Lethargy only	36.5	-22.8139	-93.5726	0	0.5	0
51	Derivation data	2	no	no	yes	no	yes	yes	no	yes	yes	yes	no	no	Invasive ventilation	Lethargy only	36.5	-22.8139	-93.5726	0.5	1	0
51	Derivation data	2	no	no	yes	no	yes	yes	no	yes	yes	yes	no	no	Invasive ventilation	Lethargy only	36.5	-22.8139	-93.5726	1	2	0
51	Derivation data	2	no	no	yes	no	yes	yes	no	yes	yes	yes	no	no	Invasive ventilation	Lethargy only	36.5	-22.8139	-93.5726	2	3	0
51	Derivation data	2	no	no	no	no	yes	no	no	yes	no	no	no	no	Invasive ventilation	Neither	36.5	-22.8139	-93.5726	3	4	0
51	Derivation data	2	no	no	no	no	yes	no	no	no	no	no	no	no	Invasive ventilation	Neither	37	13.9361	57.2547	4	5	0
51	Derivation data	2	no	no	no	no	yes	no	no	no	no	no	no	no	CPAP, BiPAP, high flow nasal cannulae	Neither	37.2	28.7762	118.301	5	6	0
51	Derivation data	2	no	no	no	no	yes	no	no	no	no	no	no	no	CPAP, BiPAP, high flow nasal cannulae	Neither	36.8	-0.82392	-3.38273	6	7	0
51	Derivation data	2	no	no	no	no	no	no	no	no	no	no	no	no	CPAP, BiPAP, high flow nasal cannulae	Neither	36.8	-0.82392	-3.38273	7	8	0
51	Derivation data	2	no	no	no	no	no	no	no	no	no	no	no	no	CPAP, BiPAP, high flow nasal cannulae	Neither	36.7	-8.17381	-33.5477	8	9	0
51	Derivation data	2	no	no	no	no	no	no	no	no	no	no	no	no	CPAP, BiPAP, high flow nasal cannulae	Neither	36.8	-0.82392	-3.38273	9	10	0
51	Derivation data	2	no	no	no	no	no	no	no	no	no	no	no	no	None	Neither	36.5	-22.8139	-93.5726	10	11	0
52	Derivation data	9	yes	no	no	no	yes	no	no	no	no	no	no	yes	CPAP, BiPAP, high flow nasal cannulae	Lethargy only	36.8	-0.82392	-3.38273	0	0.5	0
52	Derivation data	9	yes	no	no	no	yes	no	no	no	no	no	no	yes	CPAP, BiPAP, high flow nasal cannulae	Lethargy only	36.8	-0.82392	-3.38273	0.5	1	0
52	Derivation data	9	yes	no	no	no	yes	no	no	no	no	no	no	yes	CPAP, BiPAP, high flow nasal cannulae	Lethargy only	36.8	-0.82392	-3.38273	1	2	0
52	Derivation data	9	no	no	no	no	yes	no	no	no	no	no	no	no	CPAP, BiPAP, high flow nasal cannulae	Neither	36.6	-15.504	-63.6117	2	3	0
52	Derivation data	9	no	no	no	no	yes	no	no	no	no	no	no	no	CPAP, BiPAP, high flow nasal cannulae	Neither	36.7	-8.17381	-33.5477	3	4	0
52	Derivation data	9	no	no	no	no	yes	no	no	no	no	no	no	no	CPAP, BiPAP, high flow nasal cannulae	Neither	36.9	6.54625	26.8855	4	5	0
52	Derivation data	9	no	no	no	no	yes	no	no	no	no	no	no	no	CPAP, BiPAP, high flow nasal cannulae	Neither	36.9	6.54625	26.8855	5	6	0
52	Derivation data	9	no	no	no	no	yes	no	no	no	no	no	no	no	CPAP, BiPAP, high flow nasal cannulae	Neither	37.1	21.346	87.7262	6	7	0
52	Derivation data	9	no	no	no	no	no	no	no	no	no	no	no	no	Oxygen supplementation	Neither	37.3	36.2261	148.977	7	8	0
52	Derivation data	9	no	no	no	no	no	no	no	no	no	no	no	no	Oxygen supplementation	Neither	36.7	-8.17381	-33.5477	8	9	0
52	Derivation data	9	no	no	no	no	no	no	no	no	no	no	no	no	Oxygen supplementation	Neither	37	13.9361	57.2547	9	10	0
52	Derivation data	9	yes	no	no	no	no	no	no	no	no	no	no	no	Oxygen supplementation	Neither	37	13.9361	57.2547	10	11	0
52	Derivation data	9	no	no	no	no	no	no	no	no	no	no	no	no	Oxygen supplementation	Neither	37.5	51.1861	210.638	11	12	0
52	Derivation data	9	no	no	no	no	no	no	no	no	no	no	no	no	Oxygen supplementation	Neither	36.9	6.54625	26.8855	12	13	0
52	Derivation data	9	yes	no	no	no	no	no	no	no	no	no	no	no	Oxygen supplementation	Neither	37.1	21.346	87.7262	13	14	0
53	Derivation data	7	no	no	yes	no	yes	no	no	no	yes	no	no	no	Invasive ventilation	Neither	36.7	-8.17381	-33.5477	0	0.5	0
53	Derivation data	7	no	no	yes	no	yes	no	no	no	yes	no	no	no	Invasive ventilation	Neither	36.7	-8.17381	-33.5477	0.5	1	0
53	Derivation data	7	no	no	no	yes	yes	no	no	no	no	no	no	no	Invasive ventilation	Neither	38.5	127.186	525.096	1	2	0
53	Derivation data	7	no	no	no	no	no	no	no	no	no	yes	no	no	Invasive ventilation	Neither	36.9	6.54625	26.8855	2	3	0
53	Derivation data	7	no	no	no	no	yes	no	no	no	no	no	no	no	Invasive ventilation	Neither	36.7	-8.17381	-33.5477	3	4	0
53	Derivation data	7	no	no	no	yes	yes	no	no	no	no	no	no	no	Invasive ventilation	Neither	36.8	-0.82392	-3.38273	4	5	0
53	Derivation data	7	no	no	no	yes	no	no	no	no	no	no	no	no	None	Neither	36.9	6.54625	26.8855	5	6	0
53	Derivation data	7	no	no	no	yes	no	no	no	no	no	no	no	no	None	Neither	36.8	-0.82392	-3.38273	6	7	0
53	Derivation data	7	no	no	no	no	no	no	no	no	no	no	no	no	None	Neither	36.9	6.54625	26.8855	7	8	0
53	Derivation data	7	no	no	no	no	no	no	no	no	no	no	no	no	None	Neither	36.8	-0.82392	-3.38273	8	9	0
53	Derivation data	7	no	no	no	no	no	no	no	no	no	no	no	no	None	Neither	36.8	-0.82392	-3.38273	9	10	0
53	Derivation data	7	no	no	no	no	no	no	no	no	no	no	no	no	None	Neither	36.6	-15.504	-63.6117	10	11	0
53	Derivation data	7	no	no	no	yes	no	no	no	no	no	no	no	no	None	Neither	36.9	6.54625	26.8855	11	12	0
54	Derivation data	3	no	no	no	no	yes	no	no	no	no	no	no	no	CPAP, BiPAP, high flow nasal cannulae	Neither	36.6	-15.504	-63.6117	0	0.5	0
54	Derivation data	3	no	no	no	no	yes	no	no	no	no	no	no	no	CPAP, BiPAP, high flow nasal cannulae	Neither	36.6	-15.504	-63.6117	0.5	1	0
54	Derivation data	3	no	no	no	no	yes	no	no	no	no	no	no	no	CPAP, BiPAP, high flow nasal cannulae	Neither	36.6	-15.504	-63.6117	1	2	0
54	Derivation data	3	no	no	no	no	yes	no	no	no	no	no	no	no	CPAP, BiPAP, high flow nasal cannulae	Neither	36.5	-22.8139	-93.5726	2	3	0
54	Derivation data	3	no	no	no	no	yes	no	no	no	no	no	no	no	CPAP, BiPAP, high flow nasal cannulae	Neither	36.7	-8.17381	-33.5477	3	4	0
54	Derivation data	3	no	no	no	no	yes	no	no	no	no	no	no	no	CPAP, BiPAP, high flow nasal cannulae	Neither	37.1	21.346	87.7262	4	5	0
54	Derivation data	3	no	no	no	no	yes	no	no	no	no	no	no	no	CPAP, BiPAP, high flow nasal cannulae	Neither	36.7	-8.17381	-33.5477	5	6	0
54	Derivation data	3	no	no	no	no	yes	no	no	no	no	no	no	no	CPAP, BiPAP, high flow nasal cannulae	Neither	36.5	-22.8139	-93.5726	6	7	0
54	Derivation data	3	no	no	no	no	yes	no	no	no	no	no	no	no	CPAP, BiPAP, high flow nasal cannulae	Neither	36.7	-8.17381	-33.5477	7	8	0
54	Derivation data	3	no	no	yes	no	yes	no	no	no	no	no	no	no	CPAP, BiPAP, high flow nasal cannulae	Neither	36.5	-22.8139	-93.5726	8	9	0
54	Derivation data	3	no	no	no	no	yes	no	no	no	no	no	no	no	CPAP, BiPAP, high flow nasal cannulae	Neither	37	13.9361	57.2547	9	10	0
54	Derivation data	3	no	no	no	no	no	no	no	no	no	no	no	no	CPAP, BiPAP, high flow nasal cannulae	Neither	36.5	-22.8139	-93.5726	10	11	0
54	Derivation data	3	no	no	no	no	no	no	no	no	no	no	no	no	Oxygen supplementation	Neither	36.6	-15.504	-63.6117	11	12	0
54	Derivation data	3	no	no	no	no	yes	no	no	no	no	no	no	no	CPAP, BiPAP, high flow nasal cannulae	Neither	36.7	-8.17381	-33.5477	12	13	0
54	Derivation data	3	no	no	no	no	yes	no	no	no	no	no	no	no	CPAP, BiPAP, high flow nasal cannulae	Neither	37.1	21.346	87.7262	13	14	0
54	Derivation data	3	no	no	no	no	yes	no	no	no	no	no	no	no	Oxygen supplementation	Neither	37	13.9361	57.2547	14	15	0
54	Derivation data	3	no	no	no	no	yes	no	no	no	no	no	no	no	Oxygen supplementation	Neither	37	13.9361	57.2547	15	16	0
54	Derivation data	3	no	no	no	no	yes	no	no	no	no	no	no	no	Oxygen supplementation	Neither	36	-59.0639	-241.851	16	17	0
54	Derivation data	3	no	no	no	no	yes	no	no	no	no	no	no	no	Oxygen supplementation	Neither	36	-59.0639	-241.851	17	18	0
54	Derivation data	3	no	no	no	no	yes	no	no	no	no	no	no	no	Oxygen supplementation	Neither	37	13.9361	57.2547	18	19	0
54	Derivation data	3	no	no	no	no	yes	no	no	no	no	no	no	no	Oxygen supplementation	Neither	35	-130.064	-530.791	19	20	0
54	Derivation data	3	no	no	no	no	yes	no	no	no	no	no	no	no	Oxygen supplementation	Neither	34.8	-144.024	-587.363	20	21	0
54	Derivation data	3	no	no	no	no	yes	no	no	no	no	no	no	no	Oxygen supplementation	Neither	36.6	-15.504	-63.6117	21	22	0
54	Derivation data	3	no	no	no	no	yes	no	no	no	no	no	no	no	Oxygen supplementation	Neither	36.7	-8.17381	-33.5477	22	23	0
54	Derivation data	3	no	no	no	no	no	no	no	no	no	no	no	no	Oxygen supplementation	Neither	36.5	-22.8139	-93.5726	23	24	0
54	Derivation data	3	no	no	no	no	yes	no	no	no	no	no	no	no	Oxygen supplementation	Neither	36.6	-15.504	-63.6117	24	25	0
54	Derivation data	3	no	no	no	no	yes	no	no	no	no	no	no	no	Oxygen supplementation	Neither	36.5	-22.8139	-93.5726	25	26	0
54	Derivation data	3	no	no	no	no	yes	no	no	no	no	no	no	no	Oxygen supplementation	Neither	36.6	-15.504	-63.6117	26	27	0
54	Derivation data	3	no	no	no	no	no	no	no	no	no	no	no	no	None	Neither	36.7	-8.17381	-33.5477	27	28	0
55	Derivation data	8	no	no	no	no	yes	no	no	no	no	no	no	no	Invasive ventilation	Neither	37.3	36.2261	148.977	0	0.5	0
55	Derivation data	8	no	no	no	no	yes	no	no	no	no	no	no	no	Invasive ventilation	Neither	37.3	36.2261	148.977	0.5	1	0
55	Derivation data	8	no	no	no	no	yes	no	no	no	no	no	no	no	Invasive ventilation	Neither	37	13.9361	57.2547	1	2	0
55	Derivation data	8	no	no	no	no	yes	no	no	no	no	no	no	no	Oxygen supplementation	Neither	37.4	43.6962	179.757	2	3	0
55	Derivation data	8	no	no	no	no	yes	no	no	no	no	no	no	no	Oxygen supplementation	Neither	37.3	36.2261	148.977	3	4	0
55	Derivation data	8	no	no	no	no	yes	no	no	no	no	no	no	no	Oxygen supplementation	Neither	37.2	28.7762	118.301	4	5	0
55	Derivation data	8	no	no	no	no	yes	no	no	no	no	no	no	no	Oxygen supplementation	Neither	37.3	36.2261	148.977	5	6	0
55	Derivation data	8	no	no	no	no	yes	no	no	no	no	no	no	no	Oxygen supplementation	Neither	37.4	43.6962	179.757	6	7	0
55	Derivation data	8	no	no	no	no	yes	no	no	no	no	no	no	no	CPAP, BiPAP, high flow nasal cannulae	Neither	37.4	43.6962	179.757	7	8	0
56	Derivation data	12	no	yes	no	no	yes	no	no	no	no	no	no	no	Invasive ventilation	Neither	36.6	-15.504	-63.6117	0	0.5	0
56	Derivation data	12	no	yes	no	no	yes	no	no	no	no	no	no	no	Invasive ventilation	Neither	36.6	-15.504	-63.6117	0.5	1	0
56	Derivation data	12	no	yes	no	no	yes	no	no	no	no	no	no	no	Invasive ventilation	Neither	36.6	-15.504	-63.6117	1	2	0
56	Derivation data	12	no	yes	no	no	yes	no	no	no	no	no	no	no	CPAP, BiPAP, high flow nasal cannulae	Neither	36.8	-0.82392	-3.38273	2	3	0
56	Derivation data	12	no	yes	no	no	no	no	yes	no	no	no	no	no	None	Neither	36.9	6.54625	26.8855	3	4	0
56	Derivation data	12	no	yes	no	no	no	no	no	no	no	no	no	no	None	Neither	36.7	-8.17381	-33.5477	4	5	0
56	Derivation data	12	no	no	no	no	no	no	no	no	no	no	no	no	None	Neither	36.3	-37.3739	-153.19	5	6	0
56	Derivation data	12	no	yes	no	no	no	no	no	no	no	no	no	no	None	Neither	36.9	6.54625	26.8855	6	7	0
56	Derivation data	12	no	yes	no	no	no	no	no	no	no	no	no	no	None	Neither	36.2	-44.6238	-182.845	7	8	0
56	Derivation data	12	no	yes	no	no	no	no	no	no	no	no	no	no	None	Neither	37	13.9361	57.2547	8	9	0
56	Derivation data	12	no	yes	no	no	no	no	no	no	no	no	no	no	None	Neither	36.9	6.54625	26.8855	9	10	0
56	Derivation data	12	no	yes	no	no	no	no	no	no	no	no	no	no	None	Neither	36.5	-22.8139	-93.5726	10	11	0
56	Derivation data	12	no	yes	no	no	no	no	no	no	no	no	no	no	None	Neither	37	13.9361	57.2547	11	12	0
56	Derivation data	12	no	yes	no	no	no	no	no	no	no	no	no	no	None	Neither	37	13.9361	57.2547	12	13	0
56	Derivation data	12	no	yes	no	no	no	no	no	no	no	no	no	no	None	Neither	37	13.9361	57.2547	13	14	0
56	Derivation data	12	no	no	no	no	no	no	no	no	no	no	no	no	None	Neither	37	13.9361	57.2547	14	15	0
57	Derivation data	16	no	yes	no	no	no	no	no	no	no	no	yes	no	None	Neither	36.7	-8.17381	-33.5477	0	0.5	0
57	Derivation data	16	no	yes	no	no	no	no	no	no	no	no	yes	no	None	Neither	36.7	-8.17381	-33.5477	0.5	1	0
57	Derivation data	16	no	yes	no	no	no	no	no	no	no	no	yes	no	None	Neither	36.7	-8.17381	-33.5477	1	2	0
57	Derivation data	16	no	yes	no	no	no	no	no	no	no	no	no	no	None	Neither	36.8	-0.82392	-3.38273	2	3	0
58	Derivation data	3	no	no	no	no	yes	no	no	no	no	no	no	no	Invasive ventilation	Lethargy only	34	-199.064	-809.619	0	0.5	0
58	Derivation data	3	no	no	no	no	yes	no	no	no	no	no	no	no	Invasive ventilation	Lethargy only	34	-199.064	-809.619	0.5	1	0
58	Derivation data	3	no	no	no	no	yes	no	no	no	no	no	no	no	Invasive ventilation	Lethargy only	34	-199.064	-809.619	1	2	0
58	Derivation data	3	no	no	no	no	yes	no	no	no	no	no	no	no	Invasive ventilation	Lethargy only	35.1	-123.054	-502.353	2	3	0
58	Derivation data	3	no	no	no	no	yes	no	no	no	no	no	no	no	Invasive ventilation	Neither	35.5	-94.8139	-387.588	3	4	0
58	Derivation data	3	no	no	no	no	yes	no	no	no	no	no	no	no	Invasive ventilation	Neither	38.3	111.826	461.382	4	5	0
58	Derivation data	3	no	no	no	no	yes	no	no	no	no	no	no	no	Invasive ventilation	Neither	36.5	-22.8139	-93.5726	5	6	0
58	Derivation data	3	yes	no	no	no	yes	no	no	no	no	no	no	no	Invasive ventilation	Neither	37.5	51.1861	210.638	6	7	0
58	Derivation data	3	no	no	no	no	yes	no	no	no	no	no	no	no	Invasive ventilation	Neither	35.9	-66.2538	-271.201	7	8	0
58	Derivation data	3	no	no	no	no	yes	no	no	no	no	no	no	no	Invasive ventilation	Neither	36.1	-51.854	-212.4	8	9	0
58	Derivation data	3	no	no	no	no	yes	no	no	no	no	no	no	no	Invasive ventilation	Neither	36	-59.0639	-241.851	9	10	0
58	Derivation data	3	no	no	no	no	yes	no	no	no	no	no	no	no	Invasive ventilation	Neither	36.8	-0.82392	-3.38273	10	11	0
58	Derivation data	3	no	no	no	no	yes	no	no	no	no	no	no	no	CPAP, BiPAP, high flow nasal cannulae	Neither	37.9	81.3463	335.189	11	12	0
58	Derivation data	3	no	no	no	no	yes	no	no	no	no	no	no	no	CPAP, BiPAP, high flow nasal cannulae	Neither	37	13.9361	57.2547	12	13	0
59	Validation data	9	no	no	no	no	yes	no	no	no	no	no	no	no	CPAP, BiPAP, high flow nasal cannulae	Neither	36.6	-15.504	-63.6117	0	0.5	0
59	Validation data	9	no	no	no	no	yes	no	no	no	no	no	no	no	CPAP, BiPAP, high flow nasal cannulae	Neither	36.6	-15.504	-63.6117	0.5	1	0
59	Validation data	9	no	no	no	no	yes	no	no	no	no	no	no	no	CPAP, BiPAP, high flow nasal cannulae	Neither	36.5	-22.8139	-93.5726	1	2	0
59	Validation data	9	no	no	no	no	yes	no	no	no	no	no	no	no	Oxygen supplementation	Neither	37	13.9361	57.2547	2	3	0
59	Validation data	9	no	no	no	no	no	no	no	no	no	no	no	no	CPAP, BiPAP, high flow nasal cannulae	Neither	36.5	-22.8139	-93.5726	3	4	0
59	Validation data	9	yes	no	no	no	no	no	no	no	no	no	no	no	CPAP, BiPAP, high flow nasal cannulae	Neither	37	13.9361	57.2547	4	5	0
59	Validation data	9	yes	no	no	no	no	no	no	no	no	no	no	no	CPAP, BiPAP, high flow nasal cannulae	Neither	37.2	28.7762	118.301	5	6	0
59	Validation data	9	no	no	no	no	no	no	no	no	no	no	no	yes	CPAP, BiPAP, high flow nasal cannulae	Neither	37	13.9361	57.2547	6	7	0
59	Validation data	9	yes	no	no	no	no	no	no	no	no	no	no	no	CPAP, BiPAP, high flow nasal cannulae	Neither	37	13.9361	57.2547	7	8	0
60	Derivation data	13	yes	yes	no	no	yes	no	no	no	no	no	no	no	Invasive ventilation	Lethargy only	36.6	-15.504	-63.6117	0	0.5	0
60	Derivation data	13	yes	yes	no	no	yes	no	no	no	no	no	no	no	Invasive ventilation	Lethargy only	36.6	-15.504	-63.6117	0.5	1	0
60	Derivation data	13	yes	yes	no	no	yes	no	no	no	no	no	no	no	Invasive ventilation	Lethargy only	36.6	-15.504	-63.6117	1	2	0
60	Derivation data	13	yes	yes	no	yes	yes	no	no	no	no	no	no	yes	Invasive ventilation	Lethargy only	36.6	-15.504	-63.6117	2	3	0
60	Derivation data	13	no	no	no	no	yes	no	no	no	no	no	no	no	Invasive ventilation	Lethargy only	36.6	-15.504	-63.6117	3	4	0
60	Derivation data	13	no	no	no	no	yes	no	no	no	no	no	no	no	Invasive ventilation	Lethargy only	36.6	-15.504	-63.6117	4	5	0
60	Derivation data	13	no	no	no	no	yes	no	no	no	no	no	no	no	CPAP, BiPAP, high flow nasal cannulae	Lethargy only	36.6	-15.504	-63.6117	5	6	0
60	Derivation data	13	no	no	no	no	yes	no	no	no	no	no	no	no	CPAP, BiPAP, high flow nasal cannulae	Lethargy only	36.6	-15.504	-63.6117	6	7	0
60	Derivation data	13	no	no	no	no	yes	no	no	no	no	no	no	no	CPAP, BiPAP, high flow nasal cannulae	Lethargy only	36.6	-15.504	-63.6117	7	8	0
60	Derivation data	13	no	no	no	no	yes	no	no	no	no	no	no	no	CPAP, BiPAP, high flow nasal cannulae	Lethargy only	36.6	-15.504	-63.6117	8	9	0
60	Derivation data	13	no	yes	no	no	yes	no	no	no	no	no	no	no	CPAP, BiPAP, high flow nasal cannulae	Neither	36.6	-15.504	-63.6117	9	10	0
60	Derivation data	13	no	no	no	no	yes	no	no	no	no	no	no	no	CPAP, BiPAP, high flow nasal cannulae	Neither	36.6	-15.504	-63.6117	10	11	0
60	Derivation data	13	no	no	no	no	yes	no	no	no	no	no	no	no	CPAP, BiPAP, high flow nasal cannulae	Neither	36.6	-15.504	-63.6117	11	12	0
60	Derivation data	13	no	no	no	no	yes	no	no	no	no	no	no	no	None	Neither	36.6	-15.504	-63.6117	12	13	0
60	Derivation data	13	no	no	no	no	no	no	no	no	no	no	no	no	None	Neither	36.6	-15.504	-63.6117	13	14	0
60	Derivation data	13	no	no	no	no	no	no	no	no	no	no	no	no	None	Neither	36.6	-15.504	-63.6117	14	15	0
60	Derivation data	13	no	no	no	no	no	no	no	no	no	no	no	no	None	Neither	36.6	-15.504	-63.6117	15	16	0
61	Derivation data	8	yes	yes	no	no	no	no	no	no	no	no	no	yes	None	Neither	37	13.9361	57.2547	0	0.5	0
61	Derivation data	8	yes	yes	no	no	no	no	no	no	no	no	no	yes	None	Neither	37	13.9361	57.2547	0.5	1	0
61	Derivation data	8	no	no	no	no	no	no	no	no	no	no	no	no	None	Neither	37	13.9361	57.2547	1	2	0
61	Derivation data	8	no	no	no	no	no	no	no	no	no	no	no	no	None	Neither	37	13.9361	57.2547	2	3	0
61	Derivation data	8	no	no	no	no	no	no	no	no	no	no	no	no	None	Neither	37.2	28.7762	118.301	3	4	0
61	Derivation data	8	no	no	no	no	no	no	no	no	no	no	no	no	None	Neither	37	13.9361	57.2547	4	5	0
61	Derivation data	8	no	no	no	no	no	no	no	no	no	no	no	no	None	Neither	37	13.9361	57.2547	5	6	0
61	Derivation data	8	no	no	no	no	no	no	no	no	no	no	no	no	None	Neither	37.5	51.1861	210.638	6	7	0
62	Derivation data	15	no	yes	no	no	no	no	no	no	no	no	no	yes	None	Lethargy only	36.9	6.54625	26.8855	0	0.5	0
62	Derivation data	15	no	yes	no	no	no	no	no	no	no	no	no	yes	None	Lethargy only	36.9	6.54625	26.8855	0.5	1	0
62	Derivation data	15	yes	no	no	no	no	no	no	no	no	no	no	no	None	Lethargy only	37	13.9361	57.2547	1	2	0
62	Derivation data	15	no	no	no	no	no	no	no	no	no	no	no	no	None	Neither	36.9	6.54625	26.8855	2	3	0
62	Derivation data	15	no	no	no	no	no	no	no	no	no	no	no	no	None	Neither	37.5	51.1861	210.638	3	4	0
62	Derivation data	15	no	no	no	no	no	no	no	no	no	no	no	no	None	Neither	36.8	-0.82392	-3.38273	4	5	0
62	Derivation data	15	no	no	no	no	no	no	no	no	no	no	no	no	Oxygen supplementation	Neither	36.9	6.54625	26.8855	5	6	0
62	Derivation data	15	no	no	no	no	no	no	no	no	no	no	no	no	Oxygen supplementation	Neither	36.8	-0.82392	-3.38273	6	7	0
63	Derivation data	17	no	no	no	no	yes	no	no	no	no	no	no	no	None	Lethargy only	36.7	-8.17381	-33.5477	0	0.5	0
63	Derivation data	17	no	no	no	no	yes	no	no	no	no	no	no	no	None	Lethargy only	36.7	-8.17381	-33.5477	0.5	1	0
63	Derivation data	17	no	no	no	no	yes	no	no	no	no	no	no	no	None	Lethargy only	36.7	-8.17381	-33.5477	1	2	0
63	Derivation data	17	no	no	no	no	no	no	no	no	no	no	no	no	None	Neither	37.2	28.7762	118.301	2	3	0
63	Derivation data	17	no	no	no	no	no	no	no	no	no	no	no	no	None	Neither	36.3	-37.3739	-153.19	3	4	0
63	Derivation data	17	no	no	no	no	no	no	no	no	no	no	yes	no	None	Neither	36.2	-44.6238	-182.845	4	5	0
63	Derivation data	17	no	no	no	no	no	no	no	no	no	no	no	no	None	Neither	36.9	6.54625	26.8855	5	6	0
63	Derivation data	17	no	no	no	no	no	no	no	no	no	no	no	no	None	Neither	36.6	-15.504	-63.6117	6	7	0
63	Derivation data	17	no	no	no	no	no	no	no	no	no	no	no	no	None	Neither	36.8	-0.82392	-3.38273	7	8	0
63	Derivation data	17	no	no	no	no	no	no	no	no	no	no	no	no	None	Neither	36.5	-22.8139	-93.5726	8	9	0
63	Derivation data	17	no	no	no	no	no	no	no	no	no	no	no	no	None	Neither	36.7	-8.17381	-33.5477	9	10	0
63	Derivation data	17	no	no	no	no	no	no	no	no	no	no	no	no	None	Neither	36.1	-51.854	-212.4	10	11	0
63	Derivation data	17	no	no	no	no	no	no	no	no	no	no	no	no	None	Neither	36.1	-51.854	-212.4	11	12	0
63	Derivation data	17	no	no	no	no	no	no	no	no	no	no	no	no	None	Neither	35.8	-73.4239	-300.451	12	13	0
64	Validation data	2	no	no	yes	no	yes	yes	yes	no	yes	yes	no	no	Oxygen supplementation	Neither	37.2	28.7762	118.301	0	0.5	0
64	Validation data	2	no	no	yes	no	yes	yes	yes	no	yes	yes	no	no	Oxygen supplementation	Neither	37.2	28.7762	118.301	0.5	1	0
64	Validation data	2	no	no	yes	no	yes	yes	yes	no	yes	yes	no	no	Oxygen supplementation	Neither	37.2	28.7762	118.301	1	2	0
64	Validation data	2	yes	no	yes	yes	yes	no	no	no	yes	no	no	no	Oxygen supplementation	Neither	36.7	-8.17381	-33.5477	2	3	0
64	Validation data	2	yes	no	yes	yes	yes	no	no	no	yes	no	no	no	Oxygen supplementation	Neither	37.3	36.2261	148.977	3	4	0
64	Validation data	2	yes	no	yes	no	yes	no	no	no	yes	no	no	no	CPAP, BiPAP, high flow nasal cannulae	Neither	36.8	-0.82392	-3.38273	4	5	0
64	Validation data	2	yes	no	no	no	yes	no	no	no	no	no	no	no	CPAP, BiPAP, high flow nasal cannulae	Neither	37.3	36.2261	148.977	5	6	0
64	Validation data	2	yes	yes	no	no	yes	no	no	no	no	no	no	no	CPAP, BiPAP, high flow nasal cannulae	Lethargy only	37.4	43.6962	179.757	6	7	0
64	Validation data	2	yes	yes	no	yes	yes	no	no	no	no	no	no	no	CPAP, BiPAP, high flow nasal cannulae	Lethargy only	37.2	28.7762	118.301	7	8	0
64	Validation data	2	yes	yes	no	no	no	no	no	no	no	no	no	no	CPAP, BiPAP, high flow nasal cannulae	Neither	37.1	21.346	87.7262	8	9	0
64	Validation data	2	yes	yes	no	no	yes	no	no	no	yes	yes	no	no	CPAP, BiPAP, high flow nasal cannulae	Lethargy only	36.7	-8.17381	-33.5477	9	10	0
64	Validation data	2	yes	yes	no	no	yes	no	no	yes	no	no	no	no	CPAP, BiPAP, high flow nasal cannulae	Lethargy only	36.9	6.54625	26.8855	10	11	0
64	Validation data	2	yes	yes	no	no	yes	no	no	no	no	no	no	no	CPAP, BiPAP, high flow nasal cannulae	Lethargy only	37.2	28.7762	118.301	11	12	0
64	Validation data	2	yes	yes	no	no	yes	no	no	no	no	yes	no	no	CPAP, BiPAP, high flow nasal cannulae	Lethargy only	36.7	-8.17381	-33.5477	12	13	0
64	Validation data	2	yes	yes	no	no	no	no	no	no	no	no	no	no	CPAP, BiPAP, high flow nasal cannulae	Lethargy only	37.1	21.346	87.7262	13	14	0
64	Validation data	2	yes	yes	no	no	yes	no	no	no	yes	yes	no	no	CPAP, BiPAP, high flow nasal cannulae	Lethargy only	37.1	21.346	87.7262	14	15	0
64	Validation data	2	yes	no	no	no	no	no	no	no	no	no	no	no	CPAP, BiPAP, high flow nasal cannulae	Neither	37	13.9361	57.2547	15	16	0
64	Validation data	2	yes	no	no	no	no	no	no	no	no	no	no	no	None	Neither	37.3	36.2261	148.977	16	17	0
65	Derivation data	13	no	yes	no	no	no	no	yes	yes	no	no	no	yes	None	Neither	37.6	58.696	241.621	0	0.5	0
65	Derivation data	13	no	yes	no	no	no	no	yes	yes	no	no	no	yes	None	Neither	37.6	58.696	241.621	0.5	1	0
65	Derivation data	13	no	yes	no	no	no	no	yes	yes	no	no	no	no	None	Neither	36.8	-0.82392	-3.38273	1	2	0
65	Derivation data	13	no	yes	no	no	no	no	yes	yes	no	no	no	no	None	Neither	37	13.9361	57.2547	2	3	0
65	Derivation data	13	no	no	no	no	no	no	yes	yes	no	no	no	no	None	Neither	36.8	-0.82392	-3.38273	3	4	0
65	Derivation data	13	no	no	no	no	no	no	no	yes	no	no	no	no	None	Neither	37	13.9361	57.2547	4	5	0
65	Derivation data	13	no	no	no	no	no	no	no	no	no	no	no	no	None	Neither	36.8	-0.82392	-3.38273	5	6	0
66	Derivation data	7	no	no	yes	no	yes	no	no	no	yes	yes	no	no	Invasive ventilation	Neither	36.7	-8.17381	-33.5477	0	0.5	0
66	Derivation data	7	no	no	yes	no	yes	no	no	no	yes	yes	no	no	Invasive ventilation	Neither	36.7	-8.17381	-33.5477	0.5	1	0
66	Derivation data	7	yes	no	no	no	no	no	no	no	no	no	no	no	Invasive ventilation	Neither	37	13.9361	57.2547	1	2	0
66	Derivation data	7	yes	no	no	no	no	no	no	no	no	no	no	no	Invasive ventilation	Neither	36.6	-15.504	-63.6117	2	3	0
66	Derivation data	7	yes	no	no	no	no	no	no	no	no	no	no	no	None	Neither	36.7	-8.17381	-33.5477	3	4	0
66	Derivation data	7	no	no	no	no	no	no	no	no	no	no	no	no	None	Neither	36.4	-30.1038	-123.432	4	5	0
66	Derivation data	7	no	no	no	no	no	no	no	no	no	no	no	no	None	Neither	36.9	6.54625	26.8855	5	6	0
66	Derivation data	7	no	no	no	no	no	no	no	no	no	no	no	no	None	Neither	36.8	-0.82392	-3.38273	6	7	0
66	Derivation data	7	no	no	no	no	no	no	no	no	no	no	no	no	None	Neither	36.7	-8.17381	-33.5477	7	8	0
66	Derivation data	7	no	no	no	no	no	no	no	no	no	no	no	no	None	Neither	36.9	6.54625	26.8855	8	9	0
66	Derivation data	7	yes	no	no	no	no	no	no	no	no	no	no	no	None	Neither	36.5	-22.8139	-93.5726	9	10	0
66	Derivation data	7	no	no	no	no	no	no	no	no	no	no	no	no	None	Neither	36.9	6.54625	26.8855	10	11	0
66	Derivation data	7	yes	no	no	no	no	no	no	no	no	no	no	no	None	Neither	36.6	-15.504	-63.6117	11	12	0
66	Derivation data	7	no	no	no	no	no	no	no	no	no	no	no	no	None	Neither	36.7	-8.17381	-33.5477	12	13	0
67	Validation data	13	no	yes	no	no	yes	no	no	no	no	no	no	no	CPAP, BiPAP, high flow nasal cannulae	Lethargy only	36.6	-15.504	-63.6117	0	0.5	0
67	Validation data	13	no	yes	no	no	yes	no	no	no	no	no	no	no	CPAP, BiPAP, high flow nasal cannulae	Lethargy only	36.6	-15.504	-63.6117	0.5	1	0
67	Validation data	13	no	yes	no	no	yes	no	no	no	no	no	no	no	CPAP, BiPAP, high flow nasal cannulae	Lethargy only	36.6	-15.504	-63.6117	1	2	0
67	Validation data	13	no	yes	no	no	yes	no	no	no	no	no	no	no	CPAP, BiPAP, high flow nasal cannulae	Lethargy only	36.5	-22.8139	-93.5726	2	3	0
67	Validation data	13	no	no	no	no	yes	no	no	no	no	no	no	no	CPAP, BiPAP, high flow nasal cannulae	Neither	36.6	-15.504	-63.6117	3	4	0
67	Validation data	13	no	yes	no	no	yes	no	no	no	no	no	no	no	CPAP, BiPAP, high flow nasal cannulae	Neither	36.6	-15.504	-63.6117	4	5	0
67	Validation data	13	no	yes	no	yes	yes	no	no	no	no	no	no	no	CPAP, BiPAP, high flow nasal cannulae	Neither	36.6	-15.504	-63.6117	5	6	0
67	Validation data	13	no	no	no	yes	yes	no	no	no	no	no	no	no	CPAP, BiPAP, high flow nasal cannulae	Neither	36.8	-0.82392	-3.38273	6	7	0
67	Validation data	13	yes	yes	no	no	yes	no	no	no	no	no	no	no	CPAP, BiPAP, high flow nasal cannulae	Neither	36.6	-15.504	-63.6117	7	8	0
67	Validation data	13	yes	yes	no	no	yes	no	no	no	no	yes	no	no	CPAP, BiPAP, high flow nasal cannulae	Neither	36.5	-22.8139	-93.5726	8	9	0
67	Validation data	13	no	yes	no	no	yes	no	no	no	no	no	no	no	CPAP, BiPAP, high flow nasal cannulae	Neither	36.6	-15.504	-63.6117	9	10	0
67	Validation data	13	no	yes	no	no	yes	no	no	no	no	no	no	no	CPAP, BiPAP, high flow nasal cannulae	Neither	36.6	-15.504	-63.6117	10	11	0
67	Validation data	13	no	yes	no	no	no	no	no	no	no	no	no	no	None	Neither	36.6	-15.504	-63.6117	11	12	0
67	Validation data	13	no	yes	no	no	yes	no	no	no	no	no	no	no	None	Neither	36.6	-15.504	-63.6117	12	13	0
67	Validation data	13	no	yes	no	no	no	no	no	no	no	no	no	no	None	Neither	36.6	-15.504	-63.6117	13	14	0
67	Validation data	13	no	yes	no	no	no	no	no	no	no	no	no	no	None	Neither	36.6	-15.504	-63.6117	14	15	0
67	Validation data	13	no	yes	no	no	yes	no	no	no	no	no	no	no	None	Neither	36.6	-15.504	-63.6117	15	16	0
67	Validation data	13	no	no	no	no	yes	no	no	no	no	yes	no	no	CPAP, BiPAP, high flow nasal cannulae	Neither	36.5	-22.8139	-93.5726	16	17	0
67	Validation data	13	no	no	no	no	yes	no	no	no	no	no	no	no	CPAP, BiPAP, high flow nasal cannulae	Neither	36.5	-22.8139	-93.5726	17	18	0
67	Validation data	13	no	yes	no	no	yes	no	no	no	no	no	no	no	CPAP, BiPAP, high flow nasal cannulae	Neither	36.6	-15.504	-63.6117	18	19	0
67	Validation data	13	no	no	no	no	yes	no	no	no	no	no	no	no	CPAP, BiPAP, high flow nasal cannulae	Neither	36.6	-15.504	-63.6117	19	20	0
67	Validation data	13	no	no	no	no	yes	no	no	no	no	no	no	no	CPAP, BiPAP, high flow nasal cannulae	Neither	36.6	-15.504	-63.6117	20	21	0
67	Validation data	13	no	no	no	no	yes	no	no	no	no	no	no	no	CPAP, BiPAP, high flow nasal cannulae	Neither	36.6	-15.504	-63.6117	21	22	0
67	Validation data	13	no	no	no	no	yes	no	no	no	no	no	no	no	CPAP, BiPAP, high flow nasal cannulae	Neither	36.6	-15.504	-63.6117	22	23	0
67	Validation data	13	no	no	no	no	yes	no	no	no	no	no	no	no	CPAP, BiPAP, high flow nasal cannulae	Neither	36.8	-0.82392	-3.38273	23	24	0
67	Validation data	13	no	no	no	no	yes	no	no	no	no	no	no	no	CPAP, BiPAP, high flow nasal cannulae	Neither	36.6	-15.504	-63.6117	24	25	0
67	Validation data	13	no	no	no	no	yes	no	no	no	no	no	no	no	CPAP, BiPAP, high flow nasal cannulae	Neither	36.5	-22.8139	-93.5726	25	26	0
67	Validation data	13	no	no	no	no	yes	no	no	no	no	no	no	no	CPAP, BiPAP, high flow nasal cannulae	Neither	36.6	-15.504	-63.6117	26	27	0
67	Validation data	13	no	no	no	no	yes	no	no	no	no	no	no	no	CPAP, BiPAP, high flow nasal cannulae	Neither	36.5	-22.8139	-93.5726	27	28	0
68	Derivation data	13	yes	yes	no	no	no	no	no	no	no	no	no	no	None	Neither	37	13.9361	57.2547	0	0.5	0
68	Derivation data	13	yes	yes	no	no	no	no	no	no	no	no	no	no	None	Neither	37	13.9361	57.2547	0.5	1	0
68	Derivation data	13	yes	yes	no	no	no	no	no	no	no	no	no	no	None	Neither	37	13.9361	57.2547	1	2	0
68	Derivation data	13	yes	yes	no	no	no	no	no	no	no	no	no	no	None	Neither	37.4	43.6962	179.757	2	3	0
68	Derivation data	13	yes	yes	no	no	no	no	no	no	no	no	no	no	None	Neither	37	13.9361	57.2547	3	4	0
68	Derivation data	13	yes	yes	no	no	yes	no	no	no	no	no	no	no	Oxygen supplementation	Neither	37.8	73.7761	303.896	4	5	0
68	Derivation data	13	yes	yes	no	no	yes	no	no	no	no	no	no	no	Oxygen supplementation	Neither	38.8	150.376	621.44	5	6	0
68	Derivation data	13	no	yes	no	no	yes	no	no	no	no	no	no	no	Oxygen supplementation	Neither	37	13.9361	57.2547	6	7	0
68	Derivation data	13	no	no	no	no	yes	no	no	no	no	no	no	no	Oxygen supplementation	Neither	37	13.9361	57.2547	7	8	0
68	Derivation data	13	no	no	no	no	no	no	no	no	no	no	no	no	None	Neither	37.2	28.7762	118.301	8	9	0
68	Derivation data	13	no	no	no	no	no	no	no	no	no	no	no	no	None	Neither	37	13.9361	57.2547	9	10	0
68	Derivation data	13	no	no	no	no	no	no	no	no	no	no	no	no	None	Neither	37	13.9361	57.2547	10	11	0
68	Derivation data	13	no	no	no	no	no	no	no	no	no	no	no	no	None	Neither	36.8	-0.82392	-3.38273	11	12	0
68	Derivation data	13	no	yes	no	no	no	no	no	no	no	no	no	yes	None	Neither	36.6	-15.504	-63.6117	12	13	0
68	Derivation data	13	no	no	no	no	no	no	no	no	no	no	no	no	None	Neither	36.6	-15.504	-63.6117	13	14	0
69	Derivation data	13	no	no	no	no	yes	no	no	no	no	no	no	no	None	Neither	36.6	-15.504	-63.6117	0	0.5	0
69	Derivation data	13	no	no	no	no	yes	no	no	no	no	no	no	no	None	Neither	36.6	-15.504	-63.6117	0.5	1	0
69	Derivation data	13	no	no	no	no	yes	no	no	no	no	no	no	no	None	Neither	36.6	-15.504	-63.6117	1	2	0
69	Derivation data	13	no	no	no	no	no	no	no	no	no	no	no	no	None	Neither	36.6	-15.504	-63.6117	2	3	0
69	Derivation data	13	no	no	no	no	no	no	no	no	no	no	no	no	None	Neither	36.8	-0.82392	-3.38273	3	4	0
69	Derivation data	13	no	no	no	no	no	no	no	no	no	no	no	no	None	Neither	36.8	-0.82392	-3.38273	4	5	0
69	Derivation data	13	no	no	no	no	no	no	no	no	no	no	no	no	None	Neither	36.8	-0.82392	-3.38273	5	6	0
70	Derivation data	14	no	no	no	yes	no	no	no	no	no	no	no	no	None	Neither	36.8	-0.82392	-3.38273	0	0.5	0
70	Derivation data	14	no	no	no	yes	no	no	no	no	no	no	no	no	None	Neither	36.8	-0.82392	-3.38273	0.5	1	0
70	Derivation data	14	no	no	no	yes	no	no	no	no	no	no	no	no	None	Neither	36.9	6.54625	26.8855	1	2	0
70	Derivation data	14	no	no	no	no	no	no	no	no	no	no	no	no	None	Neither	36.6	-15.504	-63.6117	2	3	0
70	Derivation data	14	no	no	no	no	no	no	no	no	no	no	no	no	None	Neither	36.7	-8.17381	-33.5477	3	4	0
70	Derivation data	14	no	no	no	no	no	no	no	no	no	no	no	no	None	Neither	37	13.9361	57.2547	4	5	0
70	Derivation data	14	no	no	no	no	no	no	no	no	no	no	no	no	None	Neither	36.7	-8.17381	-33.5477	5	6	0
70	Derivation data	14	no	no	no	yes	no	no	no	no	no	no	no	no	None	Neither	36.8	-0.82392	-3.38273	6	7	0
71	Derivation data	11	yes	yes	no	no	no	no	no	no	no	no	no	no	None	Neither	36.9	6.54625	26.8855	0	0.5	0
71	Derivation data	11	yes	yes	no	no	no	no	no	no	no	no	no	no	None	Neither	36.9	6.54625	26.8855	0.5	1	0
71	Derivation data	11	yes	yes	no	no	no	no	no	no	no	no	no	no	None	Neither	36.9	6.54625	26.8855	1	2	0
71	Derivation data	11	yes	yes	no	no	no	no	no	no	no	no	no	no	None	Neither	36.9	6.54625	26.8855	2	3	0
71	Derivation data	11	no	yes	no	no	no	no	no	no	no	no	no	no	None	Neither	37.2	28.7762	118.301	3	4	0
71	Derivation data	11	no	yes	no	no	no	no	no	no	no	no	no	no	None	Neither	36.9	6.54625	26.8855	4	5	0
72	Derivation data	18	no	no	yes	no	yes	no	no	yes	yes	yes	no	no	CPAP, BiPAP, high flow nasal cannulae	Reduced/no movement	36.2	-44.6238	-182.845	0	0.5	0
72	Derivation data	18	no	no	yes	no	yes	no	no	yes	yes	yes	no	no	CPAP, BiPAP, high flow nasal cannulae	Reduced/no movement	36.2	-44.6238	-182.845	0.5	1	0
72	Derivation data	18	no	no	yes	no	no	no	no	yes	yes	yes	no	no	Invasive ventilation	Lethargy only	37	13.9361	57.2547	1	2	0
72	Derivation data	18	no	no	no	no	no	no	no	no	no	no	no	no	Invasive ventilation	Neither	36.3	-37.3739	-153.19	2	3	0
72	Derivation data	18	no	no	no	no	no	no	no	yes	no	no	no	no	CPAP, BiPAP, high flow nasal cannulae	Reduced/no movement	36.6	-15.504	-63.6117	3	4	0
72	Derivation data	18	no	no	no	no	no	no	no	no	no	no	no	no	CPAP, BiPAP, high flow nasal cannulae	Lethargy only	35.2	-116.024	-473.813	4	5	0
72	Derivation data	18	no	no	no	no	no	no	no	no	no	no	no	no	CPAP, BiPAP, high flow nasal cannulae	Lethargy only	36.6	-15.504	-63.6117	5	6	0
73	Derivation data	14	yes	yes	no	no	no	no	no	no	no	no	no	no	CPAP, BiPAP, high flow nasal cannulae	Neither	36.8	-0.82392	-3.38273	0	0.5	0
73	Derivation data	14	yes	yes	no	no	no	no	no	no	no	no	no	no	CPAP, BiPAP, high flow nasal cannulae	Neither	36.8	-0.82392	-3.38273	0.5	1	0
73	Derivation data	14	yes	yes	no	no	no	no	no	no	no	no	no	no	CPAP, BiPAP, high flow nasal cannulae	Neither	36.8	-0.82392	-3.38273	1	2	0
73	Derivation data	14	yes	yes	no	no	no	no	no	no	no	no	no	no	CPAP, BiPAP, high flow nasal cannulae	Neither	36.8	-0.82392	-3.38273	2	3	0
73	Derivation data	14	yes	yes	no	no	no	no	no	no	no	no	no	no	CPAP, BiPAP, high flow nasal cannulae	Neither	36.8	-0.82392	-3.38273	3	4	0
73	Derivation data	14	yes	yes	no	no	no	no	no	no	no	no	no	no	CPAP, BiPAP, high flow nasal cannulae	Neither	36.8	-0.82392	-3.38273	4	5	0
73	Derivation data	14	yes	yes	no	no	no	no	no	no	no	no	no	no	CPAP, BiPAP, high flow nasal cannulae	Neither	36.7	-8.17381	-33.5477	5	6	0
73	Derivation data	14	yes	no	no	no	yes	no	no	no	no	no	no	no	CPAP, BiPAP, high flow nasal cannulae	Neither	36.7	-8.17381	-33.5477	6	7	0
73	Derivation data	14	yes	yes	no	no	no	no	no	no	no	no	no	no	CPAP, BiPAP, high flow nasal cannulae	Neither	36.7	-8.17381	-33.5477	7	8	0
73	Derivation data	14	yes	yes	no	no	no	no	no	no	no	no	no	yes	Invasive ventilation	Neither	36.6	-15.504	-63.6117	8	9	0
73	Derivation data	14	no	no	no	no	no	no	no	no	no	no	no	no	CPAP, BiPAP, high flow nasal cannulae	Neither	36.7	-8.17381	-33.5477	9	10	0
73	Derivation data	14	no	no	no	no	no	no	no	no	no	no	no	no	CPAP, BiPAP, high flow nasal cannulae	Neither	37.2	28.7762	118.301	10	11	0
73	Derivation data	14	no	no	no	no	no	no	no	no	no	no	no	no	CPAP, BiPAP, high flow nasal cannulae	Neither	37	13.9361	57.2547	11	12	0
73	Derivation data	14	no	no	no	no	no	no	no	no	no	no	no	no	CPAP, BiPAP, high flow nasal cannulae	Neither	37.2	28.7762	118.301	12	13	0
73	Derivation data	14	no	no	no	no	no	no	no	no	no	no	no	no	CPAP, BiPAP, high flow nasal cannulae	Neither	36.8	-0.82392	-3.38273	13	14	0
73	Derivation data	14	no	no	no	no	no	no	no	no	no	no	no	no	CPAP, BiPAP, high flow nasal cannulae	Neither	36.8	-0.82392	-3.38273	14	15	0
73	Derivation data	14	no	no	no	no	no	no	no	no	no	no	no	no	None	Neither	36.7	-8.17381	-33.5477	15	16	0
73	Derivation data	14	no	no	no	no	no	no	no	no	no	no	no	no	None	Neither	36.5	-22.8139	-93.5726	16	17	0
73	Derivation data	14	no	no	no	no	no	no	no	no	no	no	no	no	None	Neither	36.7	-8.17381	-33.5477	17	18	0
73	Derivation data	14	no	no	no	no	no	no	no	no	no	no	no	no	None	Neither	36.4	-30.1038	-123.432	18	19	0
73	Derivation data	14	no	no	no	no	no	no	no	no	no	no	no	no	None	Neither	36.2	-44.6238	-182.845	19	20	0
73	Derivation data	14	no	no	no	no	no	no	no	no	no	no	no	no	None	Neither	36.8	-0.82392	-3.38273	20	21	0
74	Derivation data	17	no	no	no	no	yes	no	no	no	no	no	no	no	None	Lethargy only	37.9	81.3463	335.189	0	0.5	0
74	Derivation data	17	no	no	no	no	yes	no	no	no	no	no	no	no	None	Lethargy only	37.9	81.3463	335.189	0.5	1	0
74	Derivation data	17	no	no	no	no	no	no	no	no	no	no	no	no	None	Neither	35.8	-73.4239	-300.451	1	2	0
75	Derivation data	15	no	no	no	no	yes	no	no	no	no	yes	no	no	CPAP, BiPAP, high flow nasal cannulae	Neither	37.1	21.346	87.7262	0	0.5	0
75	Derivation data	15	no	no	no	no	yes	no	no	no	no	yes	no	no	CPAP, BiPAP, high flow nasal cannulae	Neither	37.1	21.346	87.7262	0.5	1	0
75	Derivation data	15	no	no	no	no	yes	no	no	no	no	yes	no	no	CPAP, BiPAP, high flow nasal cannulae	Neither	37.1	21.346	87.7262	1	2	0
75	Derivation data	15	no	no	no	no	yes	no	no	no	no	no	no	no	CPAP, BiPAP, high flow nasal cannulae	Reduced/no movement	37.7	66.2262	272.708	2	3	0
75	Derivation data	15	no	no	no	no	yes	no	no	no	no	yes	no	no	CPAP, BiPAP, high flow nasal cannulae	Neither	36.9	6.54625	26.8855	3	4	0
75	Derivation data	15	no	no	no	no	yes	no	no	no	no	yes	no	no	CPAP, BiPAP, high flow nasal cannulae	Neither	37	13.9361	57.2547	4	5	0
75	Derivation data	15	no	no	no	no	no	no	no	no	no	no	no	no	CPAP, BiPAP, high flow nasal cannulae	Neither	36.7	-8.17381	-33.5477	5	6	0
76	Derivation data	13	yes	yes	no	no	yes	no	no	no	no	no	no	no	CPAP, BiPAP, high flow nasal cannulae	Neither	37	13.9361	57.2547	0	0.5	0
76	Derivation data	13	yes	yes	no	no	yes	no	no	no	no	no	no	no	CPAP, BiPAP, high flow nasal cannulae	Neither	37	13.9361	57.2547	0.5	1	0
76	Derivation data	13	yes	yes	no	no	yes	no	no	no	no	no	no	no	CPAP, BiPAP, high flow nasal cannulae	Neither	37	13.9361	57.2547	1	2	0
76	Derivation data	13	no	no	no	no	yes	no	no	no	no	no	no	no	CPAP, BiPAP, high flow nasal cannulae	Neither	36.8	-0.82392	-3.38273	2	3	0
76	Derivation data	13	no	no	no	yes	no	no	no	no	no	no	no	no	None	Neither	36.8	-0.82392	-3.38273	3	4	0
76	Derivation data	13	no	no	no	no	no	no	no	no	no	no	no	no	None	Neither	36.8	-0.82392	-3.38273	4	5	0
76	Derivation data	13	no	no	no	no	no	no	no	no	no	no	no	no	None	Neither	36.8	-0.82392	-3.38273	5	6	0
76	Derivation data	13	no	no	no	no	no	no	no	no	no	no	no	no	None	Neither	36.8	-0.82392	-3.38273	6	7	0
76	Derivation data	13	no	no	no	no	no	no	no	no	no	no	no	no	None	Neither	37	13.9361	57.2547	7	8	0
76	Derivation data	13	no	no	no	no	no	no	no	no	no	no	no	no	None	Neither	36.8	-0.82392	-3.38273	8	9	0
76	Derivation data	13	no	no	no	no	no	no	no	no	no	no	no	no	None	Neither	36.8	-0.82392	-3.38273	9	10	0
76	Derivation data	13	no	no	no	no	no	no	no	no	no	no	no	no	None	Neither	36.8	-0.82392	-3.38273	10	11	0
76	Derivation data	13	no	no	no	no	no	no	no	no	no	no	no	no	None	Neither	36.8	-0.82392	-3.38273	11	12	0
76	Derivation data	13	no	no	no	no	no	no	no	no	no	no	no	no	None	Neither	36.8	-0.82392	-3.38273	12	13	0
76	Derivation data	13	no	no	no	no	no	no	no	no	no	no	no	no	None	Neither	36.8	-0.82392	-3.38273	13	14	0
76	Derivation data	13	no	no	no	no	no	no	no	no	no	no	no	no	None	Neither	36.8	-0.82392	-3.38273	14	15	0
76	Derivation data	13	no	no	no	no	no	no	no	no	no	no	no	no	None	Neither	36.6	-15.504	-63.6117	15	16	0
76	Derivation data	13	no	no	no	no	no	no	no	no	no	no	no	no	None	Neither	36.8	-0.82392	-3.38273	16	17	0
76	Derivation data	13	no	no	no	no	no	no	no	no	no	no	no	no	None	Neither	37	13.9361	57.2547	17	18	0
76	Derivation data	13	no	no	no	no	no	no	no	no	no	no	no	no	None	Neither	36.8	-0.82392	-3.38273	18	19	0
76	Derivation data	13	no	no	no	no	no	no	no	no	no	no	no	no	None	Neither	36.6	-15.504	-63.6117	19	20	0
76	Derivation data	13	no	no	no	no	no	no	no	no	no	no	no	no	None	Neither	36.6	-15.504	-63.6117	20	21	0
76	Derivation data	13	no	no	no	no	no	no	no	no	no	no	no	no	None	Neither	36.6	-15.504	-63.6117	21	22	0
76	Derivation data	13	no	no	no	no	no	no	no	no	no	no	no	no	None	Neither	36.6	-15.504	-63.6117	22	23	0
76	Derivation data	13	no	no	no	no	no	no	no	no	no	no	no	no	None	Neither	36.8	-0.82392	-3.38273	23	24	0
77	Derivation data	3	yes	yes	no	no	no	no	no	no	no	no	no	yes	None	Lethargy only	36.9	6.54625	26.8855	0	0.5	0
77	Derivation data	3	yes	yes	no	no	no	no	no	no	no	no	no	yes	None	Lethargy only	36.9	6.54625	26.8855	0.5	1	0
77	Derivation data	3	yes	yes	no	no	no	no	no	no	no	no	no	yes	None	Lethargy only	36.9	6.54625	26.8855	1	2	0
77	Derivation data	3	yes	yes	no	no	no	no	no	no	no	no	no	no	None	Lethargy only	36.7	-8.17381	-33.5477	2	3	0
77	Derivation data	3	yes	no	no	no	no	no	no	no	no	no	no	no	None	Neither	36	-59.0639	-241.851	3	4	0
77	Derivation data	3	no	no	no	no	no	no	no	no	no	no	no	no	None	Neither	37.1	21.346	87.7262	4	5	0
77	Derivation data	3	no	no	no	no	no	no	no	no	no	no	no	no	None	Neither	36.7	-8.17381	-33.5477	5	6	0
77	Derivation data	3	no	no	no	no	no	no	no	no	no	no	no	no	None	Neither	36.1	-51.854	-212.4	6	7	0
77	Derivation data	3	no	no	no	no	no	no	no	no	no	no	no	no	None	Neither	36.1	-51.854	-212.4	7	8	0
77	Derivation data	3	no	no	no	no	no	no	no	no	no	no	no	no	None	Neither	36.7	-8.17381	-33.5477	8	9	0
77	Derivation data	3	no	no	no	no	no	no	no	no	no	no	no	no	None	Neither	36	-59.0639	-241.851	9	10	0
77	Derivation data	3	no	no	no	no	no	no	no	no	no	no	no	no	None	Neither	36.5	-22.8139	-93.5726	10	11	0
77	Derivation data	3	no	no	no	no	no	no	no	no	no	no	no	no	None	Neither	36.8	-0.82392	-3.38273	11	12	0
77	Derivation data	3	no	no	no	no	no	no	no	no	no	no	no	no	None	Neither	37.1	21.346	87.7262	12	13	0
78	Derivation data	17	no	no	no	no	yes	no	no	no	no	yes	no	no	Oxygen supplementation	Neither	36.7	-8.17381	-33.5477	0	0.5	0
78	Derivation data	17	no	no	no	no	yes	no	no	no	no	yes	no	no	Oxygen supplementation	Neither	36.7	-8.17381	-33.5477	0.5	1	0
78	Derivation data	17	no	no	no	no	yes	no	no	no	no	yes	no	no	Oxygen supplementation	Neither	36.7	-8.17381	-33.5477	1	2	0
78	Derivation data	17	no	no	no	no	yes	no	no	no	no	no	no	no	Oxygen supplementation	Neither	37.3	36.2261	148.977	2	3	0
78	Derivation data	17	no	no	no	no	yes	no	no	no	no	no	no	no	Oxygen supplementation	Neither	36.9	6.54625	26.8855	3	4	0
78	Derivation data	17	no	no	no	no	no	no	no	no	no	no	no	no	None	Neither	36.8	-0.82392	-3.38273	4	5	0
79	Derivation data	17	no	yes	no	no	yes	no	no	no	no	no	no	no	Oxygen supplementation	Reduced/no movement	37.1	21.346	87.7262	0	0.5	0
79	Derivation data	17	no	yes	no	no	yes	no	no	no	no	no	no	no	Oxygen supplementation	Reduced/no movement	37.1	21.346	87.7262	0.5	1	0
79	Derivation data	17	no	yes	no	no	yes	no	no	no	no	no	no	no	Oxygen supplementation	Reduced/no movement	37.1	21.346	87.7262	1	2	0
79	Derivation data	17	no	yes	no	no	no	no	no	no	no	no	no	no	None	Lethargy only	37.4	43.6962	179.757	2	3	0
79	Derivation data	17	no	yes	no	no	no	no	no	no	no	no	no	no	None	Lethargy only	37.3	36.2261	148.977	3	4	0
79	Derivation data	17	no	no	no	no	no	no	no	no	no	no	no	no	None	Neither	37	13.9361	57.2547	4	5	0
80	Derivation data	10	no	yes	no	no	no	no	yes	no	no	no	no	no	None	Neither	37	13.9361	57.2547	0	0.5	0
80	Derivation data	10	no	yes	no	no	no	no	yes	no	no	no	no	no	None	Neither	37	13.9361	57.2547	0.5	1	0
80	Derivation data	10	no	yes	no	no	no	no	yes	no	no	no	no	no	None	Neither	37	13.9361	57.2547	1	2	0
80	Derivation data	10	no	yes	no	no	no	no	yes	no	no	no	no	no	None	Neither	37.5	51.1861	210.638	2	3	0
80	Derivation data	10	no	no	no	no	no	no	yes	no	no	no	no	no	None	Neither	36.3	-37.3739	-153.19	3	4	0
80	Derivation data	10	no	no	no	no	no	no	no	no	no	no	no	no	None	Lethargy only	35.7	-80.5738	-329.598	4	5	0
80	Derivation data	10	no	no	no	no	no	no	no	no	no	no	no	no	None	Neither	35.6	-87.704	-358.644	5	6	0
81	Derivation data	15	no	no	no	no	yes	no	no	no	no	yes	no	no	CPAP, BiPAP, high flow nasal cannulae	Neither	36.8	-0.82392	-3.38273	0	0.5	0
81	Derivation data	15	no	no	no	no	yes	no	no	no	no	yes	no	no	CPAP, BiPAP, high flow nasal cannulae	Neither	36.8	-0.82392	-3.38273	0.5	1	0
81	Derivation data	15	no	no	no	no	yes	no	no	no	no	yes	no	no	CPAP, BiPAP, high flow nasal cannulae	Neither	36.8	-0.82392	-3.38273	1	2	0
81	Derivation data	15	no	no	no	no	yes	no	no	no	no	no	no	no	Oxygen supplementation	Neither	36.9	6.54625	26.8855	2	3	0
81	Derivation data	15	no	no	no	no	yes	no	no	no	no	no	no	no	Oxygen supplementation	Neither	36.8	-0.82392	-3.38273	3	4	0
81	Derivation data	15	no	no	no	no	no	no	no	no	no	no	no	no	Oxygen supplementation	Neither	37	13.9361	57.2547	4	5	0
81	Derivation data	15	yes	no	no	no	no	no	no	no	no	no	no	no	Oxygen supplementation	Neither	37	13.9361	57.2547	5	6	0
81	Derivation data	15	no	no	no	no	no	no	no	no	no	no	no	no	Oxygen supplementation	Neither	36.6	-15.504	-63.6117	6	7	0
81	Derivation data	15	yes	yes	no	no	no	no	no	no	no	no	no	no	Oxygen supplementation	Neither	36.8	-0.82392	-3.38273	7	8	0
81	Derivation data	15	yes	no	no	no	no	no	no	no	no	no	no	no	Oxygen supplementation	Neither	36	-59.0639	-241.851	8	9	0
81	Derivation data	15	no	no	no	no	no	no	no	no	no	no	no	no	Oxygen supplementation	Neither	37.2	28.7762	118.301	9	10	0
81	Derivation data	15	no	no	no	no	no	no	no	no	no	no	no	no	Oxygen supplementation	Neither	37	13.9361	57.2547	10	11	0
81	Derivation data	15	no	no	no	no	no	no	no	no	no	no	no	no	Oxygen supplementation	Neither	36.8	-0.82392	-3.38273	11	12	0
81	Derivation data	15	no	no	no	no	no	no	no	no	no	no	no	no	Oxygen supplementation	Neither	36.8	-0.82392	-3.38273	12	13	0
81	Derivation data	15	no	no	no	no	no	no	no	no	no	no	no	no	Oxygen supplementation	Neither	36.6	-15.504	-63.6117	13	14	0
81	Derivation data	15	yes	no	no	no	yes	no	no	no	no	yes	no	no	CPAP, BiPAP, high flow nasal cannulae	Neither	37	13.9361	57.2547	14	15	0
81	Derivation data	15	yes	yes	no	no	no	no	no	no	no	no	no	no	CPAP, BiPAP, high flow nasal cannulae	Neither	36.8	-0.82392	-3.38273	15	16	0
81	Derivation data	15	no	no	no	no	yes	no	no	no	no	yes	no	no	CPAP, BiPAP, high flow nasal cannulae	Neither	37	13.9361	57.2547	16	17	0
81	Derivation data	15	no	no	no	no	yes	no	no	no	no	yes	no	no	CPAP, BiPAP, high flow nasal cannulae	Neither	36.9	6.54625	26.8855	17	18	0
81	Derivation data	15	no	no	no	no	yes	no	no	no	no	yes	no	no	CPAP, BiPAP, high flow nasal cannulae	Neither	36.9	6.54625	26.8855	18	19	0
81	Derivation data	15	no	no	no	no	yes	no	no	no	yes	yes	no	no	CPAP, BiPAP, high flow nasal cannulae	Lethargy only	36.9	6.54625	26.8855	19	20	0
81	Derivation data	15	no	no	no	no	yes	no	no	no	no	yes	no	no	Invasive ventilation	Lethargy only	37.4	43.6962	179.757	20	21	0
81	Derivation data	15	no	no	no	no	yes	no	no	no	no	no	no	no	Invasive ventilation	Lethargy only	36.9	6.54625	26.8855	21	22	0
81	Derivation data	15	no	no	no	no	yes	no	no	no	no	no	no	no	Invasive ventilation	Lethargy only	36.8	-0.82392	-3.38273	22	23	0
81	Derivation data	15	no	no	no	no	yes	no	no	no	no	no	no	no	Invasive ventilation	Reduced/no movement	36.9	6.54625	26.8855	23	24	0
81	Derivation data	15	no	no	no	no	yes	no	no	no	no	yes	no	no	Invasive ventilation	Neither	37	13.9361	57.2547	24	25	0
81	Derivation data	15	no	no	no	no	yes	no	no	no	no	no	no	no	Invasive ventilation	Neither	36.3	-37.3739	-153.19	25	26	0
81	Derivation data	15	no	no	no	no	no	no	no	no	no	no	no	no	Oxygen supplementation	Neither	36.9	6.54625	26.8855	26	27	0
81	Derivation data	15	no	yes	no	no	no	no	no	no	no	no	no	no	Oxygen supplementation	Neither	36.9	6.54625	26.8855	27	28	0
82	Derivation data	15	no	no	no	no	yes	no	no	no	no	yes	no	no	CPAP, BiPAP, high flow nasal cannulae	Neither	36.9	6.54625	26.8855	0	0.5	0
82	Derivation data	15	no	no	no	no	yes	no	no	no	no	yes	no	no	CPAP, BiPAP, high flow nasal cannulae	Neither	36.9	6.54625	26.8855	0.5	1	0
82	Derivation data	15	no	no	no	no	yes	no	no	no	no	yes	no	no	CPAP, BiPAP, high flow nasal cannulae	Neither	36.9	6.54625	26.8855	1	2	0
82	Derivation data	15	no	no	no	no	yes	no	no	no	no	yes	no	no	CPAP, BiPAP, high flow nasal cannulae	Neither	36.9	6.54625	26.8855	2	3	0
83	Derivation data	9	yes	yes	no	no	no	no	no	no	no	no	no	yes	None	Neither	36.6	-15.504	-63.6117	0	0.5	0
83	Derivation data	9	yes	yes	no	no	no	no	no	no	no	no	no	yes	None	Neither	36.6	-15.504	-63.6117	0.5	1	0
83	Derivation data	9	yes	yes	no	no	no	no	no	no	no	no	no	yes	None	Neither	36.6	-15.504	-63.6117	1	2	0
83	Derivation data	9	yes	no	no	no	no	no	no	no	no	no	no	no	None	Neither	37	13.9361	57.2547	2	3	0
83	Derivation data	9	no	no	no	no	no	no	no	no	no	no	no	no	None	Neither	37.2	28.7762	118.301	3	4	0
83	Derivation data	9	no	no	no	no	no	no	no	no	no	no	no	no	None	Neither	37.1	21.346	87.7262	4	5	0
83	Derivation data	9	no	no	no	no	no	no	no	no	no	no	no	no	None	Neither	37	13.9361	57.2547	5	6	0
84	Derivation data	13	yes	no	no	no	yes	no	no	no	no	no	no	no	CPAP, BiPAP, high flow nasal cannulae	Neither	36.8	-0.82392	-3.38273	0	0.5	0
84	Derivation data	13	yes	no	no	no	yes	no	no	no	no	no	no	no	CPAP, BiPAP, high flow nasal cannulae	Neither	36.8	-0.82392	-3.38273	0.5	1	0
84	Derivation data	13	no	no	no	no	yes	no	no	no	no	no	no	no	CPAP, BiPAP, high flow nasal cannulae	Neither	36.6	-15.504	-63.6117	1	2	0
84	Derivation data	13	no	no	no	no	yes	no	no	no	no	no	no	no	CPAP, BiPAP, high flow nasal cannulae	Lethargy only	36.6	-15.504	-63.6117	2	3	0
84	Derivation data	13	no	no	no	no	yes	no	no	no	no	no	no	no	CPAP, BiPAP, high flow nasal cannulae	Lethargy only	36.5	-22.8139	-93.5726	3	4	0
84	Derivation data	13	no	no	no	no	yes	no	no	no	no	no	no	no	CPAP, BiPAP, high flow nasal cannulae	Lethargy only	36.6	-15.504	-63.6117	4	5	0
84	Derivation data	13	no	no	no	no	yes	no	no	no	no	no	no	no	CPAP, BiPAP, high flow nasal cannulae	Lethargy only	36.6	-15.504	-63.6117	5	6	0
84	Derivation data	13	no	no	no	no	yes	no	no	no	no	no	no	no	CPAP, BiPAP, high flow nasal cannulae	Lethargy only	36.6	-15.504	-63.6117	6	7	0
84	Derivation data	13	no	no	no	no	yes	no	no	no	no	no	no	no	CPAP, BiPAP, high flow nasal cannulae	Lethargy only	36.6	-15.504	-63.6117	7	8	0
84	Derivation data	13	no	no	no	no	yes	no	no	no	no	no	no	no	CPAP, BiPAP, high flow nasal cannulae	Lethargy only	36.6	-15.504	-63.6117	8	9	0
85	Derivation data	11	no	yes	no	no	no	no	no	no	no	no	no	no	None	Neither	37.2	28.7762	118.301	0	0.5	0
85	Derivation data	11	no	yes	no	no	no	no	no	no	no	no	no	no	None	Neither	37.2	28.7762	118.301	0.5	1	0
85	Derivation data	11	no	yes	no	no	no	no	no	no	no	no	no	no	None	Neither	37.2	28.7762	118.301	1	2	0
85	Derivation data	11	no	no	no	no	no	no	no	no	no	no	no	no	None	Neither	37	13.9361	57.2547	2	3	0
85	Derivation data	11	no	no	no	no	no	no	no	no	no	no	no	no	None	Neither	37	13.9361	57.2547	3	4	0
86	Derivation data	15	yes	yes	no	no	no	no	no	no	no	no	no	no	Oxygen supplementation	Lethargy only	36.4	-30.1038	-123.432	0	0.5	0
86	Derivation data	15	yes	yes	no	no	no	no	no	no	no	no	no	no	Oxygen supplementation	Lethargy only	36.4	-30.1038	-123.432	0.5	1	0
86	Derivation data	15	yes	yes	no	no	no	no	no	no	no	no	no	no	Oxygen supplementation	Lethargy only	36.4	-30.1038	-123.432	1	2	0
86	Derivation data	15	yes	yes	no	no	no	no	no	no	no	no	no	no	Oxygen supplementation	Lethargy only	36.9	6.54625	26.8855	2	3	0
86	Derivation data	15	no	yes	no	no	no	no	no	no	no	no	no	no	Oxygen supplementation	Neither	36.8	-0.82392	-3.38273	3	4	0
86	Derivation data	15	no	yes	no	no	no	no	no	no	no	no	no	no	Oxygen supplementation	Neither	36.6	-15.504	-63.6117	4	5	0
86	Derivation data	15	no	no	no	no	no	no	no	no	no	no	no	no	Oxygen supplementation	Neither	36.5	-22.8139	-93.5726	5	6	0
86	Derivation data	15	no	no	no	no	yes	no	no	no	yes	yes	no	no	Oxygen supplementation	Neither	36.5	-22.8139	-93.5726	6	7	0
86	Derivation data	15	yes	no	no	no	yes	no	no	no	no	yes	no	no	Oxygen supplementation	Neither	36.8	-0.82392	-3.38273	7	8	0
86	Derivation data	15	no	no	no	no	yes	no	no	no	no	no	no	no	Oxygen supplementation	Neither	37.2	28.7762	118.301	8	9	0
86	Derivation data	15	no	no	no	no	yes	no	no	no	no	yes	no	no	Oxygen supplementation	Neither	36.7	-8.17381	-33.5477	9	10	0
86	Derivation data	15	no	no	no	no	yes	no	no	no	no	no	no	no	Oxygen supplementation	Neither	36.9	6.54625	26.8855	10	11	0
86	Derivation data	15	no	no	no	no	yes	no	no	no	no	no	no	no	Oxygen supplementation	Neither	36.9	6.54625	26.8855	11	12	0
86	Derivation data	15	no	no	no	no	yes	no	no	no	no	no	no	yes	Oxygen supplementation	Neither	36.8	-0.82392	-3.38273	12	13	0
86	Derivation data	15	yes	no	no	no	yes	no	no	no	no	no	no	no	Oxygen supplementation	Neither	36.6	-15.504	-63.6117	13	14	0
86	Derivation data	15	yes	no	no	no	yes	no	no	no	no	no	no	no	Oxygen supplementation	Neither	36.6	-15.504	-63.6117	14	15	0
86	Derivation data	15	no	no	no	no	no	no	no	no	no	no	no	no	Oxygen supplementation	Neither	36.5	-22.8139	-93.5726	15	16	0
86	Derivation data	15	no	no	no	no	yes	no	no	no	no	no	no	no	Oxygen supplementation	Neither	36.9	6.54625	26.8855	16	17	0
86	Derivation data	15	no	no	no	no	yes	no	no	no	no	no	no	no	Oxygen supplementation	Neither	36.8	-0.82392	-3.38273	17	18	0
86	Derivation data	15	no	no	no	no	yes	no	no	no	no	no	no	no	Oxygen supplementation	Neither	36.9	6.54625	26.8855	18	19	0
87	Derivation data	5	no	no	no	no	yes	yes	no	no	no	yes	no	no	Invasive ventilation	Lethargy only	36.5	-22.8139	-93.5726	0	0.5	0
87	Derivation data	5	no	no	no	no	yes	yes	no	no	no	yes	no	no	Invasive ventilation	Lethargy only	36.5	-22.8139	-93.5726	0.5	1	0
87	Derivation data	5	no	no	no	no	yes	yes	no	no	no	yes	no	no	Invasive ventilation	Neither	36.4	-30.1038	-123.432	1	2	0
87	Derivation data	5	no	no	no	no	yes	no	no	no	no	no	no	no	Invasive ventilation	Lethargy only	36.2	-44.6238	-182.845	2	3	0
87	Derivation data	5	no	no	no	no	yes	no	no	no	no	no	no	no	Invasive ventilation	Neither	36.3	-37.3739	-153.19	3	4	0
87	Derivation data	5	no	no	no	no	yes	no	no	no	no	no	no	no	Invasive ventilation	Neither	36.5	-22.8139	-93.5726	4	5	0
87	Derivation data	5	no	no	no	no	yes	no	no	no	no	yes	no	yes	Oxygen supplementation	Neither	36.6	-15.504	-63.6117	5	6	0
87	Derivation data	5	no	no	no	no	yes	no	no	no	no	no	no	no	Oxygen supplementation	Lethargy only	36.4	-30.1038	-123.432	6	7	0
87	Derivation data	5	no	no	yes	no	yes	no	no	yes	no	no	no	no	Invasive ventilation	Reduced/no movement	36.6	-15.504	-63.6117	7	8	1
88	Validation data	14	no	no	yes	no	yes	yes	no	no	no	yes	no	no	CPAP, BiPAP, high flow nasal cannulae	Neither	36.8	-0.82392	-3.38273	0	0.5	0
88	Validation data	14	no	no	yes	no	yes	yes	no	no	no	yes	no	no	CPAP, BiPAP, high flow nasal cannulae	Neither	36.8	-0.82392	-3.38273	0.5	1	0
88	Validation data	14	no	no	yes	no	yes	no	no	no	no	no	no	no	Invasive ventilation	Neither	36.8	-0.82392	-3.38273	1	2	0
88	Validation data	14	no	no	yes	no	yes	no	no	no	no	no	no	no	Invasive ventilation	Neither	36.8	-0.82392	-3.38273	2	4	1
89	Derivation data	8	no	no	no	no	yes	no	no	no	no	no	no	no	Oxygen supplementation	Neither	37.5	51.1861	210.638	0	0.5	0
89	Derivation data	8	no	no	no	no	yes	no	no	no	no	no	no	no	Oxygen supplementation	Neither	37.5	51.1861	210.638	0.5	1	0
89	Derivation data	8	no	no	no	no	no	no	no	no	no	no	no	no	None	Neither	37.5	51.1861	210.638	1	2	0
89	Derivation data	8	no	no	no	no	no	no	no	no	no	no	no	no	None	Neither	37.3	36.2261	148.977	2	3	0
89	Derivation data	8	no	no	no	no	no	no	no	no	no	no	no	no	None	Neither	37.2	28.7762	118.301	3	4	0
89	Derivation data	8	no	no	no	no	no	no	no	no	no	no	no	no	None	Neither	37	13.9361	57.2547	4	5	0
89	Derivation data	8	no	no	no	no	no	no	no	no	no	no	no	no	None	Neither	37.4	43.6962	179.757	5	6	0
90	Derivation data	12	no	yes	no	no	yes	no	yes	no	yes	no	no	no	Invasive ventilation	Neither	37.3	36.2261	148.977	0	0.5	0
90	Derivation data	12	no	yes	no	no	yes	no	yes	no	yes	no	no	no	Invasive ventilation	Neither	37.3	36.2261	148.977	0.5	1	0
90	Derivation data	12	no	yes	no	no	yes	no	yes	no	yes	no	no	no	Invasive ventilation	Neither	37.3	36.2261	148.977	1	2	0
90	Derivation data	12	no	yes	no	no	yes	no	no	no	no	no	no	no	Invasive ventilation	Neither	36.7	-8.17381	-33.5477	2	3	0
90	Derivation data	12	no	yes	no	no	yes	no	no	no	no	no	no	no	Oxygen supplementation	Neither	36.7	-8.17381	-33.5477	3	4	0
90	Derivation data	12	no	yes	no	no	no	no	no	no	no	no	no	no	None	Neither	36.8	-0.82392	-3.38273	4	5	0
90	Derivation data	12	no	yes	no	no	no	no	no	no	no	no	no	no	None	Neither	36.9	6.54625	26.8855	5	6	0
90	Derivation data	12	no	no	no	no	no	no	no	no	no	no	no	no	None	Neither	36.8	-0.82392	-3.38273	6	7	0
90	Derivation data	12	no	no	no	no	no	no	yes	no	no	no	yes	no	None	Neither	37.4	43.6962	179.757	7	8	0
90	Derivation data	12	no	no	no	no	no	no	no	no	no	no	no	no	None	Neither	37.6	58.696	241.621	8	9	0
90	Derivation data	12	no	no	no	no	no	no	no	no	no	no	no	no	None	Neither	37.4	43.6962	179.757	9	10	0
90	Derivation data	12	no	no	no	no	no	no	no	no	no	no	no	no	None	Neither	37.5	51.1861	210.638	10	11	0
90	Derivation data	12	no	no	no	no	no	no	no	no	no	no	no	no	None	Neither	37	13.9361	57.2547	11	12	0
90	Derivation data	12	no	no	no	no	no	no	no	no	no	no	no	no	None	Neither	36.8	-0.82392	-3.38273	12	13	0
90	Derivation data	12	no	no	no	no	no	no	no	no	no	no	no	no	None	Neither	36.8	-0.82392	-3.38273	13	14	0
90	Derivation data	12	no	no	no	no	no	no	no	no	no	no	no	no	None	Neither	36.8	-0.82392	-3.38273	14	15	0
90	Derivation data	12	no	no	no	no	no	no	no	no	no	no	no	no	None	Neither	36.6	-15.504	-63.6117	15	16	0
90	Derivation data	12	no	no	no	no	no	no	no	no	no	no	no	no	None	Neither	36.8	-0.82392	-3.38273	16	17	0
90	Derivation data	12	no	no	no	no	no	no	no	no	no	no	no	no	None	Neither	36.8	-0.82392	-3.38273	17	18	0
90	Derivation data	12	no	no	no	no	no	no	no	no	no	no	no	no	None	Neither	37	13.9361	57.2547	18	19	0
90	Derivation data	12	no	no	no	no	no	no	no	no	no	no	no	no	None	Neither	36.8	-0.82392	-3.38273	19	20	0
90	Derivation data	12	no	no	no	no	no	no	no	no	no	no	no	no	None	Neither	36.9	6.54625	26.8855	20	21	0
90	Derivation data	12	no	no	no	no	no	no	no	no	no	no	no	no	None	Neither	36.8	-0.82392	-3.38273	21	22	0
91	Derivation data	12	no	yes	yes	no	yes	no	no	no	yes	no	no	no	Invasive ventilation	Reduced/no movement	36.4	-30.1038	-123.432	0	0.5	0
91	Derivation data	12	no	yes	yes	no	yes	no	no	no	yes	no	no	no	Invasive ventilation	Reduced/no movement	36.4	-30.1038	-123.432	0.5	1	0
91	Derivation data	12	no	yes	yes	no	yes	no	no	no	yes	no	no	no	Invasive ventilation	Reduced/no movement	36.4	-30.1038	-123.432	1	2	0
91	Derivation data	12	no	yes	no	no	yes	no	no	no	no	no	no	no	Invasive ventilation	Reduced/no movement	36.1	-51.854	-212.4	2	3	0
91	Derivation data	12	no	yes	no	no	yes	no	no	no	no	no	no	no	Invasive ventilation	Reduced/no movement	36.6	-15.504	-63.6117	3	4	0
91	Derivation data	12	no	yes	no	no	yes	no	no	no	no	no	no	no	Invasive ventilation	Neither	37	13.9361	57.2547	4	5	0
91	Derivation data	12	no	yes	no	no	yes	no	no	no	no	no	no	no	Invasive ventilation	Reduced/no movement	37.1	21.346	87.7262	5	6	0
91	Derivation data	12	no	yes	no	no	yes	no	no	no	no	no	no	no	Invasive ventilation	Reduced/no movement	36.5	-22.8139	-93.5726	6	7	0
91	Derivation data	12	no	yes	no	no	yes	no	no	no	no	no	no	no	Invasive ventilation	Reduced/no movement	37.4	43.6962	179.757	7	8	0
91	Derivation data	12	no	yes	no	no	yes	no	no	no	no	no	no	no	Invasive ventilation	Neither	37.1	21.346	87.7262	8	9	0
91	Derivation data	12	no	yes	no	no	yes	no	no	no	no	no	no	no	Invasive ventilation	Neither	36.5	-22.8139	-93.5726	9	10	0
91	Derivation data	12	no	yes	no	no	yes	no	no	no	no	no	no	no	Oxygen supplementation	Neither	37.8	73.7761	303.896	10	11	0
91	Derivation data	12	no	no	no	no	yes	no	no	no	no	no	no	no	Oxygen supplementation	Neither	37	13.9361	57.2547	11	12	0
91	Derivation data	12	no	no	no	no	yes	no	no	no	no	no	no	no	Oxygen supplementation	Neither	36.6	-15.504	-63.6117	12	13	0
91	Derivation data	12	no	no	no	no	yes	no	no	no	no	no	no	no	Oxygen supplementation	Neither	36.5	-22.8139	-93.5726	13	14	0
91	Derivation data	12	no	no	no	no	yes	no	no	no	no	no	no	no	Oxygen supplementation	Neither	37.1	21.346	87.7262	14	15	0
91	Derivation data	12	no	no	no	no	yes	no	no	no	no	no	no	no	Oxygen supplementation	Neither	36.9	6.54625	26.8855	15	16	0
91	Derivation data	12	no	no	no	no	yes	no	no	no	no	no	no	no	Oxygen supplementation	Neither	36.9	6.54625	26.8855	16	17	0
91	Derivation data	12	no	no	no	no	yes	no	no	no	no	no	no	no	None	Neither	36.1	-51.854	-212.4	17	18	0
91	Derivation data	12	no	no	no	no	yes	no	no	no	no	no	no	no	None	Neither	36.9	6.54625	26.8855	18	19	0
91	Derivation data	12	no	no	no	no	yes	no	no	no	no	no	no	no	None	Neither	36.8	-0.82392	-3.38273	19	20	0
91	Derivation data	12	no	no	no	no	yes	no	no	no	no	no	no	no	None	Neither	36.6	-15.504	-63.6117	20	21	0
91	Derivation data	12	no	no	no	no	no	no	no	no	no	no	no	no	None	Neither	36.6	-15.504	-63.6117	21	22	0
91	Derivation data	12	no	no	no	no	no	no	no	no	no	no	no	no	None	Neither	37.2	28.7762	118.301	22	23	0
91	Derivation data	12	no	no	no	no	no	no	no	no	no	no	no	no	None	Neither	37.6	58.696	241.621	23	24	0
91	Derivation data	12	no	no	no	no	no	no	no	no	no	no	no	no	None	Neither	36.8	-0.82392	-3.38273	24	25	0
91	Derivation data	12	no	no	no	no	no	no	no	no	no	no	no	no	None	Neither	36.9	6.54625	26.8855	25	26	0
91	Derivation data	12	no	no	no	no	no	no	no	no	no	no	no	no	None	Neither	36.4	-30.1038	-123.432	26	27	0
91	Derivation data	12	no	no	no	no	no	no	no	no	no	no	no	no	None	Neither	36.1	-51.854	-212.4	27	28	0
92	Validation data	16	no	yes	no	no	yes	no	no	no	no	no	no	no	Oxygen supplementation	Lethargy only	36.9	6.54625	26.8855	0	0.5	0
92	Validation data	16	no	yes	no	no	yes	no	no	no	no	no	no	no	Oxygen supplementation	Lethargy only	36.9	6.54625	26.8855	0.5	1	0
92	Validation data	16	no	yes	no	no	yes	no	no	no	no	no	no	no	Oxygen supplementation	Lethargy only	36.9	6.54625	26.8855	1	2	0
92	Validation data	16	no	yes	no	no	no	no	no	no	no	no	no	no	None	Neither	36.5	-22.8139	-93.5726	2	3	0
92	Validation data	16	no	no	no	no	no	no	no	no	no	no	no	no	None	Neither	37	13.9361	57.2547	3	4	0
93	Validation data	5	no	no	no	no	yes	no	yes	no	no	no	no	no	Invasive ventilation	Neither	36.5	-22.8139	-93.5726	0	0.5	0
93	Validation data	5	no	no	no	no	yes	no	yes	no	no	no	no	no	Invasive ventilation	Neither	36.5	-22.8139	-93.5726	0.5	1	0
93	Validation data	5	no	no	no	no	yes	no	yes	no	no	no	no	no	Invasive ventilation	Neither	36.5	-22.8139	-93.5726	1	2	0
93	Validation data	5	no	no	no	no	yes	no	no	no	no	no	no	no	Invasive ventilation	Lethargy only	36.5	-22.8139	-93.5726	2	3	0
93	Validation data	5	no	no	no	no	yes	no	no	no	no	no	no	no	Invasive ventilation	Lethargy only	36.4	-30.1038	-123.432	3	4	0
93	Validation data	5	no	no	no	no	yes	no	no	no	no	no	no	no	CPAP, BiPAP, high flow nasal cannulae	Lethargy only	36.2	-44.6238	-182.845	4	5	0
93	Validation data	5	no	no	no	no	yes	no	no	no	no	no	no	no	CPAP, BiPAP, high flow nasal cannulae	Lethargy only	36.5	-22.8139	-93.5726	5	6	0
93	Validation data	5	no	no	no	no	yes	no	no	no	no	no	no	no	CPAP, BiPAP, high flow nasal cannulae	Lethargy only	36.4	-30.1038	-123.432	6	7	0
93	Validation data	5	no	no	no	no	yes	no	no	no	no	no	no	no	CPAP, BiPAP, high flow nasal cannulae	Lethargy only	36.5	-22.8139	-93.5726	7	8	0
93	Validation data	5	no	no	no	no	yes	no	no	no	no	no	no	no	CPAP, BiPAP, high flow nasal cannulae	Lethargy only	36.4	-30.1038	-123.432	8	9	0
93	Validation data	5	no	no	no	no	yes	no	no	no	no	no	no	no	CPAP, BiPAP, high flow nasal cannulae	Neither	36.7	-8.17381	-33.5477	9	10	0
93	Validation data	5	no	no	no	no	no	no	no	no	no	no	no	no	None	Neither	36.4	-30.1038	-123.432	10	11	0
93	Validation data	5	no	no	no	no	yes	no	no	no	no	yes	no	yes	CPAP, BiPAP, high flow nasal cannulae	Neither	36.4	-30.1038	-123.432	11	12	0
93	Validation data	5	no	no	no	no	yes	no	no	no	no	yes	no	no	CPAP, BiPAP, high flow nasal cannulae	Neither	36.8	-0.82392	-3.38273	12	13	0
93	Validation data	5	no	no	no	no	yes	no	no	no	no	no	no	no	CPAP, BiPAP, high flow nasal cannulae	Neither	36.5	-22.8139	-93.5726	13	14	0
93	Validation data	5	no	no	no	no	no	no	no	no	no	no	no	no	None	Neither	36.5	-22.8139	-93.5726	14	15	0
93	Validation data	5	no	no	no	no	yes	no	no	no	no	no	no	no	CPAP, BiPAP, high flow nasal cannulae	Neither	36.6	-15.504	-63.6117	15	16	0
93	Validation data	5	no	no	no	no	yes	no	no	no	no	no	no	no	CPAP, BiPAP, high flow nasal cannulae	Neither	36.5	-22.8139	-93.5726	16	17	0
93	Validation data	5	no	no	no	no	yes	no	no	no	no	no	no	no	CPAP, BiPAP, high flow nasal cannulae	Neither	36.4	-30.1038	-123.432	17	18	0
93	Validation data	5	no	no	no	no	yes	no	no	no	no	no	no	no	CPAP, BiPAP, high flow nasal cannulae	Neither	36.4	-30.1038	-123.432	18	19	0
94	Validation data	13	no	yes	no	no	yes	no	no	no	no	yes	no	no	CPAP, BiPAP, high flow nasal cannulae	Neither	36.6	-15.504	-63.6117	0	0.5	0
94	Validation data	13	no	yes	no	no	yes	no	no	no	no	yes	no	no	CPAP, BiPAP, high flow nasal cannulae	Neither	36.6	-15.504	-63.6117	0.5	1	0
95	Derivation data	10	no	yes	yes	no	yes	no	no	no	yes	no	no	no	CPAP, BiPAP, high flow nasal cannulae	Lethargy only	35.8	-73.4239	-300.451	0	0.5	0
95	Derivation data	10	no	yes	yes	no	yes	no	no	no	yes	no	no	no	CPAP, BiPAP, high flow nasal cannulae	Lethargy only	35.8	-73.4239	-300.451	0.5	2	1
96	Derivation data	16	yes	yes	no	no	yes	yes	no	no	no	no	no	no	Oxygen supplementation	Reduced/no movement	37.8	73.7761	303.896	0	0.5	0
96	Derivation data	16	yes	yes	no	no	yes	yes	no	no	no	no	no	no	Oxygen supplementation	Reduced/no movement	37.8	73.7761	303.896	0.5	1	1
97	Derivation data	15	yes	yes	no	no	no	no	no	no	no	yes	no	no	Oxygen supplementation	Neither	37.2	28.7762	118.301	0	0.5	0
97	Derivation data	15	yes	yes	no	no	no	no	no	no	no	yes	no	no	Oxygen supplementation	Neither	37.2	28.7762	118.301	0.5	1	0
97	Derivation data	15	yes	yes	no	no	no	no	no	no	no	no	no	no	Oxygen supplementation	Neither	36.7	-8.17381	-33.5477	1	2	0
97	Derivation data	15	yes	yes	no	no	no	no	no	no	no	no	no	no	Oxygen supplementation	Neither	36.9	6.54625	26.8855	2	3	0
97	Derivation data	15	no	yes	no	no	no	no	no	no	no	no	no	no	Oxygen supplementation	Neither	37	13.9361	57.2547	3	4	0
97	Derivation data	15	no	no	no	no	yes	no	no	no	no	no	no	no	Oxygen supplementation	Neither	36.4	-30.1038	-123.432	4	5	0
98	Derivation data	17	no	yes	no	no	yes	no	no	no	no	no	no	no	Oxygen supplementation	Lethargy only	36.5	-22.8139	-93.5726	0	0.5	0
98	Derivation data	17	no	yes	no	no	yes	no	no	no	no	no	no	no	Oxygen supplementation	Lethargy only	36.5	-22.8139	-93.5726	0.5	1	0
98	Derivation data	17	no	yes	no	no	yes	no	no	no	no	no	no	no	Oxygen supplementation	Lethargy only	36.5	-22.8139	-93.5726	1	2	0
98	Derivation data	17	no	yes	no	no	yes	no	no	no	no	no	no	no	Oxygen supplementation	Lethargy only	36.7	-8.17381	-33.5477	2	3	0
98	Derivation data	17	no	no	no	no	yes	no	no	no	no	no	no	no	Oxygen supplementation	Neither	36	-59.0639	-241.851	3	4	0
98	Derivation data	17	no	no	no	no	yes	no	no	no	no	no	no	no	Oxygen supplementation	Neither	36.6	-15.504	-63.6117	4	5	0
99	Derivation data	11	no	yes	no	yes	yes	yes	no	no	no	no	no	no	Oxygen supplementation	Neither	37	13.9361	57.2547	0	0.5	0
99	Derivation data	11	no	yes	no	yes	yes	yes	no	no	no	no	no	no	Oxygen supplementation	Neither	37	13.9361	57.2547	0.5	1	0
99	Derivation data	11	no	yes	no	yes	yes	yes	no	no	no	no	no	no	Oxygen supplementation	Neither	37	13.9361	57.2547	1	2	0
99	Derivation data	11	no	yes	no	yes	yes	yes	no	no	no	no	no	no	Oxygen supplementation	Neither	37	13.9361	57.2547	2	3	0
99	Derivation data	11	no	no	no	yes	yes	no	no	no	no	no	no	no	Oxygen supplementation	Neither	37	13.9361	57.2547	3	4	0
99	Derivation data	11	no	no	no	yes	yes	no	no	no	no	no	no	no	Oxygen supplementation	Neither	37.1	21.346	87.7262	4	5	0
99	Derivation data	11	no	no	no	yes	yes	no	no	no	no	no	no	no	Oxygen supplementation	Neither	37.1	21.346	87.7262	5	6	0
99	Derivation data	11	no	no	no	yes	yes	no	no	no	no	no	no	no	Oxygen supplementation	Neither	36.9	6.54625	26.8855	6	7	0
99	Derivation data	11	no	yes	no	no	yes	no	no	no	no	no	no	no	Oxygen supplementation	Neither	36.9	6.54625	26.8855	7	8	0
99	Derivation data	11	no	no	no	yes	yes	no	no	no	no	no	no	no	Oxygen supplementation	Neither	37	13.9361	57.2547	8	9	0
100	Derivation data	3	no	yes	no	no	no	no	no	no	no	no	no	no	None	Neither	36.5	-22.8139	-93.5726	0	0.5	0
100	Derivation data	3	no	yes	no	no	no	no	no	no	no	no	no	no	None	Neither	36.5	-22.8139	-93.5726	0.5	1	0
100	Derivation data	3	no	no	no	no	no	no	no	no	no	no	no	no	None	Neither	36.7	-8.17381	-33.5477	1	3	0
101	Derivation data	7	no	no	yes	yes	no	no	no	no	no	no	no	no	None	Neither	36.7	-8.17381	-33.5477	0	0.5	0
101	Derivation data	7	no	no	yes	yes	no	no	no	no	no	no	no	no	None	Neither	36.7	-8.17381	-33.5477	0.5	1	0
101	Derivation data	7	no	no	no	no	no	no	no	no	no	no	no	no	None	Neither	36.8	-0.82392	-3.38273	1	2	0
101	Derivation data	7	no	no	no	yes	no	no	no	no	no	no	no	no	None	Neither	36.6	-15.504	-63.6117	2	3	0
101	Derivation data	7	no	no	no	yes	no	no	no	no	no	no	no	no	None	Neither	36.5	-22.8139	-93.5726	3	4	0
101	Derivation data	7	no	no	no	no	no	no	no	no	no	no	no	no	None	Neither	36.6	-15.504	-63.6117	4	5	0
101	Derivation data	7	no	no	no	no	no	no	no	no	no	no	no	no	None	Neither	36.8	-0.82392	-3.38273	5	6	0
101	Derivation data	7	no	no	no	no	no	no	no	no	no	no	no	no	None	Neither	36.7	-8.17381	-33.5477	6	7	0
102	Derivation data	16	no	yes	yes	no	no	no	no	yes	no	no	no	no	None	Reduced/no movement	37.3	36.2261	148.977	0	0.5	0
102	Derivation data	16	no	yes	yes	no	no	no	no	yes	no	no	no	no	None	Reduced/no movement	37.3	36.2261	148.977	0.5	1	0
102	Derivation data	16	no	yes	yes	no	no	no	no	yes	no	no	no	no	None	Reduced/no movement	37.3	36.2261	148.977	1	2	0
103	Derivation data	15	no	no	no	yes	yes	no	no	no	no	yes	no	no	CPAP, BiPAP, high flow nasal cannulae	Neither	37	13.9361	57.2547	0	0.5	0
103	Derivation data	15	no	no	no	yes	yes	no	no	no	no	yes	no	no	CPAP, BiPAP, high flow nasal cannulae	Neither	37	13.9361	57.2547	0.5	1	0
103	Derivation data	15	no	no	no	yes	yes	no	no	no	no	yes	no	no	CPAP, BiPAP, high flow nasal cannulae	Neither	37	13.9361	57.2547	1	2	0
103	Derivation data	15	no	no	no	yes	yes	no	no	no	no	no	no	no	CPAP, BiPAP, high flow nasal cannulae	Neither	37	13.9361	57.2547	2	3	0
103	Derivation data	15	no	no	no	no	yes	no	no	no	no	no	no	no	CPAP, BiPAP, high flow nasal cannulae	Neither	36.9	6.54625	26.8855	3	4	0
103	Derivation data	15	no	no	no	no	yes	no	no	yes	yes	yes	no	no	Invasive ventilation	Lethargy only	36.8	-0.82392	-3.38273	4	5	0
103	Derivation data	15	no	no	no	no	yes	no	no	no	no	yes	no	no	Invasive ventilation	Neither	36.8	-0.82392	-3.38273	5	6	0
104	Derivation data	11	no	no	no	no	yes	no	no	yes	no	no	no	no	Invasive ventilation	Neither	36.7	-8.17381	-33.5477	0	0.5	0
104	Derivation data	11	no	no	no	no	yes	no	no	yes	no	no	no	no	Invasive ventilation	Neither	36.7	-8.17381	-33.5477	0.5	1	0
104	Derivation data	11	no	no	no	no	yes	no	no	yes	no	no	no	no	Invasive ventilation	Neither	36.7	-8.17381	-33.5477	1	2	0
104	Derivation data	11	no	yes	yes	yes	yes	no	no	yes	no	no	yes	no	Invasive ventilation	Neither	37.2	28.7762	118.301	2	3	0
104	Derivation data	11	no	yes	no	yes	yes	no	no	yes	no	no	no	no	Invasive ventilation	Neither	37.1	21.346	87.7262	3	4	0
104	Derivation data	11	no	yes	no	yes	yes	no	no	yes	no	no	no	no	Invasive ventilation	Reduced/no movement	37.2	28.7762	118.301	4	5	0
104	Derivation data	11	no	yes	no	yes	yes	no	no	yes	no	no	no	no	Invasive ventilation	Lethargy only	37.3	36.2261	148.977	5	6	0
104	Derivation data	11	no	yes	no	yes	yes	no	no	yes	no	no	no	no	Invasive ventilation	Neither	37.1	21.346	87.7262	6	7	0
104	Derivation data	11	no	yes	no	yes	yes	no	no	yes	no	no	no	no	Invasive ventilation	Neither	37	13.9361	57.2547	7	8	0
104	Derivation data	11	yes	yes	no	yes	yes	no	no	yes	no	no	no	no	Invasive ventilation	Neither	37.3	36.2261	148.977	8	9	0
104	Derivation data	11	yes	yes	no	yes	yes	no	no	yes	no	no	no	no	Invasive ventilation	Neither	36.7	-8.17381	-33.5477	9	10	0
104	Derivation data	11	no	yes	no	yes	yes	no	no	yes	no	no	no	no	Invasive ventilation	Neither	37	13.9361	57.2547	10	11	0
104	Derivation data	11	yes	yes	no	yes	yes	no	no	no	no	no	no	no	Invasive ventilation	Reduced/no movement	37	13.9361	57.2547	11	12	0
104	Derivation data	11	yes	yes	no	yes	yes	no	no	no	no	no	no	no	Invasive ventilation	Reduced/no movement	37	13.9361	57.2547	12	13	0
104	Derivation data	11	yes	yes	no	yes	yes	no	no	no	no	no	no	no	Invasive ventilation	Reduced/no movement	37	13.9361	57.2547	13	14	0
104	Derivation data	11	no	yes	no	yes	yes	no	no	no	no	no	no	no	Invasive ventilation	Reduced/no movement	36.8	-0.82392	-3.38273	14	15	0
104	Derivation data	11	yes	yes	no	yes	yes	no	no	no	yes	no	no	no	Invasive ventilation	Reduced/no movement	37	13.9361	57.2547	15	16	0
104	Derivation data	11	yes	yes	no	no	yes	no	no	no	no	no	no	no	Invasive ventilation	Neither	37	13.9361	57.2547	16	17	0
104	Derivation data	11	no	yes	no	no	yes	no	no	no	no	no	no	no	Oxygen supplementation	Neither	36.6	-15.504	-63.6117	17	18	0
104	Derivation data	11	no	yes	no	no	yes	no	no	no	no	no	no	no	Oxygen supplementation	Neither	36.9	6.54625	26.8855	18	19	0
104	Derivation data	11	no	yes	no	no	yes	no	no	no	no	yes	no	no	CPAP, BiPAP, high flow nasal cannulae	Neither	36.9	6.54625	26.8855	19	20	0
104	Derivation data	11	no	yes	no	no	yes	no	no	no	yes	no	no	no	Invasive ventilation	Neither	37.1	21.346	87.7262	20	21	0
104	Derivation data	11	no	yes	no	no	yes	no	no	no	yes	no	no	no	Invasive ventilation	Neither	37	13.9361	57.2547	21	22	0
104	Derivation data	11	no	yes	no	no	yes	no	no	no	no	no	no	no	Invasive ventilation	Neither	36.9	6.54625	26.8855	22	23	0
104	Derivation data	11	no	yes	no	no	yes	no	no	no	no	no	no	no	Invasive ventilation	Neither	36.9	6.54625	26.8855	23	24	0
104	Derivation data	11	no	yes	no	no	yes	no	no	no	no	no	no	no	Invasive ventilation	Neither	37.7	66.2262	272.708	24	25	0
105	Derivation data	13	yes	yes	no	no	yes	no	no	no	no	no	no	no	CPAP, BiPAP, high flow nasal cannulae	Lethargy only	36.6	-15.504	-63.6117	0	0.5	0
105	Derivation data	13	yes	yes	no	no	yes	no	no	no	no	no	no	no	CPAP, BiPAP, high flow nasal cannulae	Lethargy only	36.6	-15.504	-63.6117	0.5	1	0
105	Derivation data	13	yes	yes	no	no	yes	no	no	no	no	no	no	no	CPAP, BiPAP, high flow nasal cannulae	Lethargy only	36.6	-15.504	-63.6117	1	2	1
106	Derivation data	11	yes	yes	no	yes	no	no	no	yes	no	no	no	yes	None	Neither	37	13.9361	57.2547	0	0.5	0
106	Derivation data	11	yes	yes	no	yes	no	no	no	yes	no	no	no	yes	None	Neither	37	13.9361	57.2547	0.5	1	0
106	Derivation data	11	yes	yes	no	yes	no	no	no	yes	no	no	no	yes	None	Neither	37	13.9361	57.2547	1	2	0
106	Derivation data	11	yes	yes	no	yes	no	no	no	yes	no	no	no	no	None	Neither	37.1	21.346	87.7262	2	3	0
106	Derivation data	11	yes	yes	no	yes	no	no	no	yes	no	no	no	no	None	Neither	36.7	-8.17381	-33.5477	3	4	0
106	Derivation data	11	yes	yes	no	yes	no	no	no	yes	no	no	no	no	None	Neither	37.1	21.346	87.7262	4	5	0
106	Derivation data	11	no	yes	no	yes	no	no	no	yes	no	no	no	no	None	Neither	36.9	6.54625	26.8855	5	6	0
106	Derivation data	11	no	yes	no	yes	no	no	no	yes	no	no	no	no	None	Neither	36.8	-0.82392	-3.38273	6	7	0
106	Derivation data	11	no	yes	no	yes	no	no	no	yes	no	no	no	no	None	Neither	36.8	-0.82392	-3.38273	7	8	0
106	Derivation data	11	no	yes	no	yes	no	no	no	yes	no	no	no	no	None	Neither	37	13.9361	57.2547	8	9	0
106	Derivation data	11	no	yes	no	yes	no	no	no	yes	no	no	no	no	None	Neither	37	13.9361	57.2547	9	10	0
106	Derivation data	11	no	yes	no	yes	no	no	no	yes	no	no	no	no	None	Neither	37	13.9361	57.2547	10	11	0
106	Derivation data	11	no	yes	no	yes	no	no	no	yes	no	no	no	no	None	Neither	37	13.9361	57.2547	11	12	0
106	Derivation data	11	no	yes	no	yes	no	no	no	yes	no	no	no	no	None	Neither	37	13.9361	57.2547	12	13	0
106	Derivation data	11	no	yes	no	yes	no	no	no	yes	no	no	no	no	None	Neither	37	13.9361	57.2547	13	14	0
107	Derivation data	6	yes	no	no	no	no	no	no	yes	no	no	no	no	None	Neither	36.2	-44.6238	-182.845	0	0.5	0
107	Derivation data	6	yes	no	no	no	no	no	no	yes	no	no	no	no	None	Neither	36.2	-44.6238	-182.845	0.5	1	0
107	Derivation data	6	yes	no	no	no	no	no	no	yes	no	no	no	no	None	Neither	36.2	-44.6238	-182.845	1	2	0
107	Derivation data	6	yes	no	no	no	no	no	no	yes	no	no	no	no	None	Neither	36.2	-44.6238	-182.845	2	3	0
107	Derivation data	6	yes	no	no	no	no	no	no	yes	no	no	no	no	None	Neither	36.2	-44.6238	-182.845	3	4	0
107	Derivation data	6	no	no	no	no	no	no	no	no	no	no	no	no	None	Neither	36.6	-15.504	-63.6117	4	5	0
107	Derivation data	6	no	no	no	no	no	no	no	no	no	no	no	no	None	Neither	36.6	-15.504	-63.6117	5	6	0
107	Derivation data	6	no	no	no	no	no	no	no	no	no	no	no	no	None	Neither	36.4	-30.1038	-123.432	6	7	0
107	Derivation data	6	no	no	no	no	no	no	no	no	no	no	no	no	None	Neither	36	-59.0639	-241.851	7	8	0
107	Derivation data	6	no	no	no	no	no	no	no	no	no	no	no	no	None	Neither	36.4	-30.1038	-123.432	8	9	0
107	Derivation data	6	no	no	no	no	no	no	no	no	no	no	no	no	None	Neither	36	-59.0639	-241.851	9	10	0
107	Derivation data	6	no	no	no	no	no	no	no	no	no	no	no	no	None	Neither	36.2	-44.6238	-182.845	10	11	0
107	Derivation data	6	no	no	no	no	no	no	no	no	no	no	no	no	None	Neither	36.4	-30.1038	-123.432	11	12	0
107	Derivation data	6	no	no	no	no	no	no	no	no	no	no	no	no	None	Neither	36.6	-15.504	-63.6117	12	13	0
108	Validation data	11	no	no	no	no	no	no	no	no	no	no	no	no	None	Neither	37	13.9361	57.2547	0	0.5	0
108	Validation data	11	no	no	no	no	no	no	no	no	no	no	no	no	None	Neither	37	13.9361	57.2547	0.5	1	0
108	Validation data	11	no	no	no	no	no	no	no	no	no	no	no	no	None	Neither	37	13.9361	57.2547	1	2	0
108	Validation data	11	no	no	no	no	no	no	no	no	no	no	no	no	None	Neither	36.9	6.54625	26.8855	2	3	0
108	Validation data	11	no	no	no	no	no	no	no	no	no	no	no	no	None	Neither	37	13.9361	57.2547	3	4	0
109	Derivation data	12	no	yes	no	no	no	no	no	no	no	no	no	no	None	Neither	38	88.9361	366.583	0	0.5	0
109	Derivation data	12	no	yes	no	no	no	no	no	no	no	no	no	no	None	Neither	38	88.9361	366.583	0.5	1	0
109	Derivation data	12	no	yes	no	no	no	no	no	no	no	no	no	no	None	Neither	38	88.9361	366.583	1	2	0
109	Derivation data	12	no	no	no	no	no	no	no	no	no	no	no	no	None	Neither	38.3	111.826	461.382	2	3	0
109	Derivation data	12	no	no	no	no	no	no	no	no	no	no	no	no	None	Neither	37.3	36.2261	148.977	3	4	0
109	Derivation data	12	no	no	no	no	no	no	no	no	no	no	no	no	None	Neither	37.4	43.6962	179.757	4	5	0
109	Derivation data	12	no	no	no	no	no	no	no	no	no	no	no	no	None	Neither	37	13.9361	57.2547	5	6	0
109	Derivation data	12	no	no	no	no	no	no	no	no	no	no	no	no	None	Neither	37	13.9361	57.2547	6	7	0
109	Derivation data	12	no	no	no	no	no	no	no	no	no	no	no	no	None	Neither	37	13.9361	57.2547	7	8	0
109	Derivation data	12	no	no	no	no	no	no	no	no	no	no	no	no	None	Neither	37.2	28.7762	118.301	8	9	0
109	Derivation data	12	no	no	no	no	no	no	no	no	no	no	no	no	None	Neither	36.8	-0.82392	-3.38273	9	10	0
109	Derivation data	12	no	no	no	no	no	no	no	no	no	no	no	no	None	Neither	37.3	36.2261	148.977	10	11	0
109	Derivation data	12	no	no	no	no	no	no	no	no	no	no	no	no	None	Neither	36.7	-8.17381	-33.5477	11	12	0
109	Derivation data	12	no	no	no	no	no	no	no	no	no	no	no	no	None	Neither	37	13.9361	57.2547	12	13	0
109	Derivation data	12	no	no	no	no	no	no	no	no	no	no	no	no	None	Neither	37	13.9361	57.2547	13	14	0
109	Derivation data	12	no	no	no	no	no	no	no	no	no	no	no	no	None	Neither	36.7	-8.17381	-33.5477	14	15	0
109	Derivation data	12	no	no	no	no	no	no	no	no	no	no	no	no	None	Neither	36.5	-22.8139	-93.5726	15	16	0
109	Derivation data	12	no	no	no	no	no	no	no	no	no	no	no	no	None	Neither	37	13.9361	57.2547	16	17	0
109	Derivation data	12	no	no	no	no	no	no	no	no	no	no	no	no	None	Neither	36.8	-0.82392	-3.38273	17	18	0
109	Derivation data	12	no	no	no	no	no	no	no	no	no	no	no	no	None	Neither	36.7	-8.17381	-33.5477	18	19	0
110	Derivation data	4	no	yes	yes	no	no	yes	yes	no	no	no	no	no	None	Neither	36.9	6.54625	26.8855	0	0.5	0
110	Derivation data	4	no	yes	yes	no	no	yes	yes	no	no	no	no	no	None	Neither	36.9	6.54625	26.8855	0.5	1	0
110	Derivation data	4	no	yes	yes	no	no	yes	yes	no	no	no	no	no	None	Neither	36.9	6.54625	26.8855	1	2	0
110	Derivation data	4	no	yes	no	no	no	no	yes	no	no	no	no	no	None	Neither	36.9	6.54625	26.8855	2	3	0
110	Derivation data	4	no	yes	no	no	no	no	no	no	no	no	no	no	None	Neither	36.7	-8.17381	-33.5477	3	4	0
110	Derivation data	4	no	yes	no	no	no	no	no	no	no	no	no	no	None	Neither	36.8	-0.82392	-3.38273	4	5	0
110	Derivation data	4	no	yes	no	no	no	no	no	no	no	no	no	no	None	Neither	36.7	-8.17381	-33.5477	5	6	0
110	Derivation data	4	no	yes	no	no	no	no	no	no	no	no	no	no	None	Neither	36.6	-15.504	-63.6117	6	7	0
110	Derivation data	4	no	yes	no	no	no	no	no	no	no	no	no	no	None	Neither	36.8	-0.82392	-3.38273	7	8	0
110	Derivation data	4	no	yes	no	no	no	no	no	no	no	no	no	no	None	Neither	36.7	-8.17381	-33.5477	8	9	0
110	Derivation data	4	no	yes	no	no	no	no	no	no	no	no	no	no	None	Neither	36.8	-0.82392	-3.38273	9	10	0
110	Derivation data	4	no	no	no	no	no	no	no	no	no	no	no	no	None	Neither	36.8	-0.82392	-3.38273	10	11	0
110	Derivation data	4	no	no	no	no	no	no	no	no	no	no	no	no	None	Neither	37	13.9361	57.2547	11	12	0
110	Derivation data	4	no	no	no	no	no	no	no	no	no	no	no	no	None	Neither	36.6	-15.504	-63.6117	12	13	0
111	Derivation data	5	no	yes	no	no	yes	no	no	no	no	no	no	yes	CPAP, BiPAP, high flow nasal cannulae	Neither	36.8	-0.82392	-3.38273	0	0.5	0
111	Derivation data	5	no	yes	no	no	yes	no	no	no	no	no	no	yes	CPAP, BiPAP, high flow nasal cannulae	Neither	36.8	-0.82392	-3.38273	0.5	1	0
111	Derivation data	5	no	yes	no	no	yes	no	no	no	no	no	no	yes	CPAP, BiPAP, high flow nasal cannulae	Neither	36.8	-0.82392	-3.38273	1	2	0
111	Derivation data	5	no	yes	no	no	yes	no	no	no	no	no	no	no	CPAP, BiPAP, high flow nasal cannulae	Neither	36.4	-30.1038	-123.432	2	3	0
111	Derivation data	5	no	no	no	no	yes	no	no	no	no	no	no	no	CPAP, BiPAP, high flow nasal cannulae	Neither	36.6	-15.504	-63.6117	3	4	0
111	Derivation data	5	no	no	no	no	yes	no	no	no	no	no	no	no	CPAP, BiPAP, high flow nasal cannulae	Neither	36.5	-22.8139	-93.5726	4	5	0
111	Derivation data	5	no	no	no	no	yes	no	no	no	no	no	no	no	CPAP, BiPAP, high flow nasal cannulae	Neither	36.6	-15.504	-63.6117	5	6	0
111	Derivation data	5	no	no	no	no	yes	no	no	no	no	no	no	no	CPAP, BiPAP, high flow nasal cannulae	Neither	36.5	-22.8139	-93.5726	6	7	0
111	Derivation data	5	no	no	no	no	yes	no	no	no	no	no	no	no	CPAP, BiPAP, high flow nasal cannulae	Neither	36.5	-22.8139	-93.5726	7	8	0
111	Derivation data	5	no	no	no	no	yes	no	no	no	no	no	no	no	CPAP, BiPAP, high flow nasal cannulae	Neither	36.6	-15.504	-63.6117	8	9	0
112	Derivation data	19	yes	yes	no	no	yes	no	no	yes	no	yes	no	yes	Invasive ventilation	Lethargy only	36.8	-0.82392	-3.38273	0	0.5	0
112	Derivation data	19	yes	yes	no	no	yes	no	no	yes	no	yes	no	yes	Invasive ventilation	Lethargy only	36.8	-0.82392	-3.38273	0.5	1	0
112	Derivation data	19	yes	yes	yes	yes	yes	no	no	yes	no	yes	no	no	Invasive ventilation	Reduced/no movement	36.6	-15.504	-63.6117	1	2	0
112	Derivation data	19	yes	yes	no	yes	yes	no	no	no	no	no	no	no	Invasive ventilation	Neither	36.5	-22.8139	-93.5726	2	3	0
112	Derivation data	19	no	yes	no	yes	yes	no	no	no	no	no	no	no	CPAP, BiPAP, high flow nasal cannulae	Neither	36.5	-22.8139	-93.5726	3	4	0
112	Derivation data	19	no	no	yes	no	yes	no	no	no	no	no	no	no	CPAP, BiPAP, high flow nasal cannulae	Lethargy only	35.9	-66.2538	-271.201	4	5	0
112	Derivation data	19	no	no	no	no	yes	no	no	no	no	no	no	no	CPAP, BiPAP, high flow nasal cannulae	Neither	36.5	-22.8139	-93.5726	5	6	0
112	Derivation data	19	no	no	no	no	yes	no	no	no	no	no	no	no	CPAP, BiPAP, high flow nasal cannulae	Neither	36.3	-37.3739	-153.19	6	7	0
112	Derivation data	19	no	no	no	no	yes	no	no	no	no	no	no	no	CPAP, BiPAP, high flow nasal cannulae	Neither	36.6	-15.504	-63.6117	7	8	0
113	Derivation data	7	no	no	no	no	no	yes	no	no	no	no	no	no	None	Neither	36.9	6.54625	26.8855	0	0.5	0
113	Derivation data	7	no	no	no	no	no	yes	no	no	no	no	no	no	None	Neither	36.9	6.54625	26.8855	0.5	1	0
113	Derivation data	7	no	no	no	no	no	no	no	no	no	no	no	no	None	Neither	36.6	-15.504	-63.6117	1	2	0
113	Derivation data	7	no	no	no	yes	no	no	no	no	no	no	no	no	None	Neither	36.5	-22.8139	-93.5726	2	3	0
113	Derivation data	7	no	no	no	no	no	no	no	no	no	no	no	no	None	Neither	36.6	-15.504	-63.6117	3	4	0
113	Derivation data	7	no	no	no	no	no	no	no	no	no	no	no	no	None	Neither	36.8	-0.82392	-3.38273	4	5	0
113	Derivation data	7	no	no	no	no	no	no	no	no	no	no	no	no	None	Neither	36.4	-30.1038	-123.432	5	6	0
114	Derivation data	9	no	yes	no	no	no	no	no	no	no	no	no	yes	None	Neither	37	13.9361	57.2547	0	0.5	0
114	Derivation data	9	no	yes	no	no	no	no	no	no	no	no	no	yes	None	Neither	37	13.9361	57.2547	0.5	1	0
114	Derivation data	9	no	yes	no	no	no	no	no	no	no	no	no	yes	None	Neither	36.8	-0.82392	-3.38273	1	2	0
114	Derivation data	9	no	no	no	no	no	no	no	no	no	no	no	no	None	Neither	36.6	-15.504	-63.6117	2	3	0
114	Derivation data	9	no	no	no	no	no	no	no	no	no	no	no	no	None	Neither	37	13.9361	57.2547	3	4	0
115	Derivation data	7	no	no	yes	no	yes	yes	yes	no	yes	no	no	no	Invasive ventilation	Neither	37	13.9361	57.2547	0	0.5	0
115	Derivation data	7	no	no	yes	no	yes	yes	yes	no	yes	no	no	no	Invasive ventilation	Neither	37	13.9361	57.2547	0.5	1	0
115	Derivation data	7	no	no	yes	no	yes	yes	yes	no	yes	no	no	no	Invasive ventilation	Neither	37	13.9361	57.2547	1	2	0
115	Derivation data	7	no	no	yes	no	yes	no	no	no	no	no	no	no	Invasive ventilation	Neither	36.9	6.54625	26.8855	2	3	0
115	Derivation data	7	no	no	no	no	no	no	no	no	no	no	no	no	None	Neither	37.1	21.346	87.7262	3	4	0
115	Derivation data	7	no	no	no	no	no	no	no	no	no	no	no	no	CPAP, BiPAP, high flow nasal cannulae	Neither	36.6	-15.504	-63.6117	4	5	0
115	Derivation data	7	no	no	no	no	no	no	no	no	no	no	no	no	CPAP, BiPAP, high flow nasal cannulae	Neither	37	13.9361	57.2547	5	6	0
115	Derivation data	7	no	no	no	no	no	no	no	no	no	no	no	no	CPAP, BiPAP, high flow nasal cannulae	Neither	36.7	-8.17381	-33.5477	6	7	0
115	Derivation data	7	no	no	no	no	no	no	no	no	no	no	no	no	CPAP, BiPAP, high flow nasal cannulae	Neither	36.9	6.54625	26.8855	7	8	0
115	Derivation data	7	no	no	no	no	no	no	no	no	no	no	no	no	None	Neither	36.8	-0.82392	-3.38273	8	9	0
115	Derivation data	7	no	no	no	no	no	no	no	no	no	no	no	no	CPAP, BiPAP, high flow nasal cannulae	Neither	36.5	-22.8139	-93.5726	9	10	0
115	Derivation data	7	no	no	no	no	no	no	no	no	no	no	no	no	CPAP, BiPAP, high flow nasal cannulae	Neither	36.5	-22.8139	-93.5726	10	11	0
115	Derivation data	7	no	no	no	no	no	no	no	no	no	no	no	no	CPAP, BiPAP, high flow nasal cannulae	Neither	37.1	21.346	87.7262	11	12	0
115	Derivation data	7	no	no	no	no	no	no	no	no	no	no	no	no	None	Neither	36.7	-8.17381	-33.5477	12	13	0
116	Derivation data	2	yes	no	no	no	no	yes	yes	yes	yes	yes	no	no	CPAP, BiPAP, high flow nasal cannulae	Lethargy only	36.8	-0.82392	-3.38273	0	0.5	0
116	Derivation data	2	yes	no	no	no	no	yes	yes	yes	yes	yes	no	no	CPAP, BiPAP, high flow nasal cannulae	Lethargy only	36.8	-0.82392	-3.38273	0.5	1	0
116	Derivation data	2	no	no	no	no	no	no	no	yes	no	no	no	no	CPAP, BiPAP, high flow nasal cannulae	Lethargy only	36.7	-8.17381	-33.5477	1	2	0
116	Derivation data	2	no	no	no	no	no	no	no	no	no	no	no	no	None	Lethargy only	37.1	21.346	87.7262	2	3	0
116	Derivation data	2	no	no	no	no	no	no	no	no	no	no	no	no	None	Neither	37.4	43.6962	179.757	3	4	0
116	Derivation data	2	no	no	no	no	no	no	no	no	no	no	no	no	None	Neither	37.2	28.7762	118.301	4	5	0
116	Derivation data	2	no	no	no	no	no	no	no	no	no	no	no	no	None	Neither	37	13.9361	57.2547	5	6	0
116	Derivation data	2	no	no	no	no	no	no	no	no	no	no	no	no	None	Neither	37.2	28.7762	118.301	6	7	0
117	Derivation data	11	yes	yes	no	yes	yes	no	no	no	no	no	no	no	Oxygen supplementation	Neither	36.9	6.54625	26.8855	0	0.5	0
117	Derivation data	11	yes	yes	no	yes	yes	no	no	no	no	no	no	no	Oxygen supplementation	Neither	36.9	6.54625	26.8855	0.5	1	0
117	Derivation data	11	yes	yes	no	yes	yes	no	no	no	no	no	no	no	Oxygen supplementation	Neither	36.9	6.54625	26.8855	1	2	0
117	Derivation data	11	yes	yes	no	yes	yes	no	no	no	no	no	no	no	Oxygen supplementation	Neither	37	13.9361	57.2547	2	3	0
117	Derivation data	11	no	yes	no	yes	yes	no	no	no	no	no	no	no	Oxygen supplementation	Neither	37	13.9361	57.2547	3	4	0
117	Derivation data	11	yes	yes	no	yes	yes	no	no	no	no	no	no	no	Oxygen supplementation	Neither	36.7	-8.17381	-33.5477	4	5	0
117	Derivation data	11	no	yes	no	yes	yes	no	no	no	no	no	no	no	Oxygen supplementation	Neither	37.1	21.346	87.7262	5	6	0
117	Derivation data	11	yes	no	no	no	no	no	no	no	no	no	no	no	None	Neither	37.1	21.346	87.7262	6	7	0
117	Derivation data	11	no	no	no	no	no	no	no	no	no	no	no	no	None	Neither	37	13.9361	57.2547	7	8	0
118	Derivation data	11	no	yes	yes	no	yes	no	no	yes	yes	no	no	no	Invasive ventilation	Reduced/no movement	36.9	6.54625	26.8855	0	0.5	0
118	Derivation data	11	no	yes	yes	no	yes	no	no	yes	yes	no	no	no	Invasive ventilation	Reduced/no movement	36.9	6.54625	26.8855	0.5	1	0
118	Derivation data	11	no	yes	yes	no	yes	no	no	yes	yes	no	no	no	Invasive ventilation	Reduced/no movement	36.9	6.54625	26.8855	1	2	0
118	Derivation data	11	no	yes	no	no	yes	no	no	yes	yes	no	no	no	Invasive ventilation	Reduced/no movement	37	13.9361	57.2547	2	3	0
118	Derivation data	11	no	yes	no	no	yes	no	no	yes	no	no	no	no	CPAP, BiPAP, high flow nasal cannulae	Neither	37	13.9361	57.2547	3	4	0
118	Derivation data	11	no	yes	no	yes	yes	no	no	yes	no	no	no	no	CPAP, BiPAP, high flow nasal cannulae	Reduced/no movement	37	13.9361	57.2547	4	5	0
118	Derivation data	11	no	yes	no	yes	yes	no	no	yes	no	no	no	no	CPAP, BiPAP, high flow nasal cannulae	Reduced/no movement	36.7	-8.17381	-33.5477	5	6	0
118	Derivation data	11	no	yes	no	no	yes	no	no	yes	no	no	no	no	CPAP, BiPAP, high flow nasal cannulae	Reduced/no movement	36.8	-0.82392	-3.38273	6	7	0
118	Derivation data	11	no	yes	no	no	yes	no	no	yes	no	no	no	no	CPAP, BiPAP, high flow nasal cannulae	Reduced/no movement	37	13.9361	57.2547	7	8	0
118	Derivation data	11	no	yes	no	no	yes	no	no	yes	no	no	no	no	CPAP, BiPAP, high flow nasal cannulae	Reduced/no movement	36.9	6.54625	26.8855	8	9	0
119	Derivation data	13	yes	yes	no	no	no	no	no	no	no	no	no	no	None	Neither	36.8	-0.82392	-3.38273	0	0.5	0
119	Derivation data	13	yes	yes	no	no	no	no	no	no	no	no	no	no	None	Neither	36.8	-0.82392	-3.38273	0.5	1	0
119	Derivation data	13	no	yes	no	no	no	no	no	no	no	no	no	no	None	Neither	36.8	-0.82392	-3.38273	1	2	0
119	Derivation data	13	no	no	no	no	no	no	no	no	no	no	no	no	None	Neither	36.6	-15.504	-63.6117	2	3	0
119	Derivation data	13	no	no	no	no	no	no	no	no	no	no	no	no	None	Neither	36.6	-15.504	-63.6117	3	4	0
119	Derivation data	13	no	no	no	no	no	no	no	no	no	no	no	no	None	Neither	36.6	-15.504	-63.6117	4	5	0
119	Derivation data	13	no	no	no	no	no	no	no	no	no	no	no	no	None	Neither	37.8	73.7761	303.896	5	6	0
119	Derivation data	13	no	no	no	no	no	no	no	no	no	no	no	yes	None	Neither	36.6	-15.504	-63.6117	6	7	0
119	Derivation data	13	no	no	no	no	no	no	no	no	no	no	no	no	None	Neither	36.6	-15.504	-63.6117	7	8	0
119	Derivation data	13	no	no	no	no	no	no	no	no	no	no	no	no	None	Neither	36.8	-0.82392	-3.38273	8	9	0
119	Derivation data	13	no	no	no	no	no	no	no	no	no	no	no	no	None	Neither	36.6	-15.504	-63.6117	9	10	0
120	Derivation data	8	no	yes	no	no	yes	no	no	no	yes	yes	no	no	Invasive ventilation	Neither	37.3	36.2261	148.977	0	0.5	0
120	Derivation data	8	no	yes	no	no	yes	no	no	no	yes	yes	no	no	Invasive ventilation	Neither	37.3	36.2261	148.977	0.5	1	0
120	Derivation data	8	no	no	no	no	yes	no	no	no	no	no	no	no	CPAP, BiPAP, high flow nasal cannulae	Neither	37.2	28.7762	118.301	1	2	0
120	Derivation data	8	no	no	no	no	yes	no	no	no	no	no	no	no	CPAP, BiPAP, high flow nasal cannulae	Neither	37.1	21.346	87.7262	2	3	0
120	Derivation data	8	no	no	no	no	yes	no	no	no	no	yes	no	no	CPAP, BiPAP, high flow nasal cannulae	Neither	37.1	21.346	87.7262	3	4	0
120	Derivation data	8	no	no	no	no	yes	no	no	no	no	no	no	no	CPAP, BiPAP, high flow nasal cannulae	Neither	37.4	43.6962	179.757	4	5	0
120	Derivation data	8	no	no	no	no	yes	no	no	no	no	no	no	no	Invasive ventilation	Neither	37	13.9361	57.2547	5	6	0
120	Derivation data	8	no	no	no	no	yes	no	no	no	no	no	no	no	Invasive ventilation	Neither	37.2	28.7762	118.301	6	7	0
120	Derivation data	8	no	no	no	no	yes	no	no	no	no	no	no	no	Invasive ventilation	Neither	37.2	28.7762	118.301	7	8	0
120	Derivation data	8	no	no	no	no	yes	no	no	no	no	no	no	no	Invasive ventilation	Neither	37.3	36.2261	148.977	8	9	0
120	Derivation data	8	no	no	no	no	yes	no	no	no	no	no	no	no	Invasive ventilation	Neither	37.4	43.6962	179.757	9	10	0
120	Derivation data	8	no	no	no	no	yes	no	no	no	no	no	no	no	Invasive ventilation	Neither	37.2	28.7762	118.301	10	11	0
120	Derivation data	8	no	no	no	no	no	no	no	no	no	no	no	no	CPAP, BiPAP, high flow nasal cannulae	Neither	37.4	43.6962	179.757	11	12	0
120	Derivation data	8	no	no	no	no	no	no	no	no	no	yes	no	no	CPAP, BiPAP, high flow nasal cannulae	Neither	37.3	36.2261	148.977	12	13	0
120	Derivation data	8	no	no	no	no	no	no	no	no	no	yes	no	no	CPAP, BiPAP, high flow nasal cannulae	Neither	37.2	28.7762	118.301	13	14	0
121	Derivation data	2	yes	yes	yes	no	yes	no	no	no	no	no	yes	no	Invasive ventilation	Lethargy only	37.3	36.2261	148.977	0	0.5	0
121	Derivation data	2	yes	yes	yes	no	yes	no	no	no	no	no	yes	no	Invasive ventilation	Lethargy only	37.3	36.2261	148.977	0.5	1	0
121	Derivation data	2	yes	yes	yes	no	yes	no	no	no	no	no	yes	no	Invasive ventilation	Lethargy only	37.3	36.2261	148.977	1	2	0
121	Derivation data	2	yes	yes	no	no	yes	no	no	no	no	no	no	no	Invasive ventilation	Lethargy only	36.8	-0.82392	-3.38273	2	3	0
121	Derivation data	2	yes	yes	no	no	no	no	no	no	no	no	no	no	Invasive ventilation	Lethargy only	36.6	-15.504	-63.6117	3	4	0
121	Derivation data	2	yes	yes	no	no	no	no	no	no	no	no	no	no	Invasive ventilation	Lethargy only	37.5	51.1861	210.638	4	5	0
121	Derivation data	2	yes	yes	no	no	no	no	no	no	no	no	no	no	Invasive ventilation	Lethargy only	37	13.9361	57.2547	5	6	0
121	Derivation data	2	yes	yes	no	no	no	no	no	no	no	no	no	no	Invasive ventilation	Lethargy only	37.2	28.7762	118.301	6	7	0
121	Derivation data	2	yes	yes	no	no	no	no	no	no	no	no	no	no	CPAP, BiPAP, high flow nasal cannulae	Lethargy only	37.2	28.7762	118.301	7	8	0
121	Derivation data	2	yes	yes	no	no	no	no	no	no	no	no	no	no	None	Lethargy only	36.8	-0.82392	-3.38273	8	9	0
121	Derivation data	2	yes	yes	no	no	no	no	no	no	no	no	no	no	None	Lethargy only	36.7	-8.17381	-33.5477	9	10	0
121	Derivation data	2	yes	yes	no	no	no	no	no	no	no	no	no	no	None	Lethargy only	37.2	28.7762	118.301	10	11	0
121	Derivation data	2	yes	yes	no	no	no	no	no	no	no	no	yes	no	None	Lethargy only	36.6	-15.504	-63.6117	11	12	0
121	Derivation data	2	yes	yes	no	no	no	no	no	no	no	no	no	no	None	Lethargy only	37.1	21.346	87.7262	12	13	0
121	Derivation data	2	yes	yes	no	no	no	no	no	no	no	no	no	no	None	Lethargy only	36.7	-8.17381	-33.5477	13	14	0
121	Derivation data	2	yes	yes	no	no	no	no	no	no	no	no	no	no	None	Lethargy only	37	13.9361	57.2547	14	15	0
121	Derivation data	2	yes	yes	no	no	no	no	no	no	no	no	yes	no	None	Lethargy only	37	13.9361	57.2547	15	16	0
121	Derivation data	2	yes	yes	no	no	no	no	no	no	no	no	no	no	None	Lethargy only	37	13.9361	57.2547	16	17	0
121	Derivation data	2	yes	yes	no	no	no	no	no	no	no	no	yes	no	None	Lethargy only	37	13.9361	57.2547	17	18	0
121	Derivation data	2	yes	yes	yes	no	no	no	no	no	no	no	yes	no	CPAP, BiPAP, high flow nasal cannulae	Lethargy only	37.1	21.346	87.7262	18	19	0
121	Derivation data	2	yes	yes	yes	no	no	no	no	no	no	no	yes	no	CPAP, BiPAP, high flow nasal cannulae	Lethargy only	37.1	21.346	87.7262	19	20	0
121	Derivation data	2	yes	no	no	no	no	no	no	no	yes	no	no	no	CPAP, BiPAP, high flow nasal cannulae	Lethargy only	37	13.9361	57.2547	20	21	0
121	Derivation data	2	no	yes	no	no	no	no	no	no	no	no	no	no	CPAP, BiPAP, high flow nasal cannulae	Lethargy only	37	13.9361	57.2547	21	22	0
121	Derivation data	2	yes	no	no	no	no	no	no	no	no	no	no	no	CPAP, BiPAP, high flow nasal cannulae	Lethargy only	36.8	-0.82392	-3.38273	22	23	0
121	Derivation data	2	yes	no	no	no	no	no	no	no	no	no	no	no	CPAP, BiPAP, high flow nasal cannulae	Lethargy only	37	13.9361	57.2547	23	24	0
121	Derivation data	2	yes	no	no	no	no	no	no	no	no	no	no	no	CPAP, BiPAP, high flow nasal cannulae	Lethargy only	37	13.9361	57.2547	24	25	0
121	Derivation data	2	yes	no	no	no	no	no	no	no	no	no	no	no	CPAP, BiPAP, high flow nasal cannulae	Lethargy only	36.6	-15.504	-63.6117	25	26	0
121	Derivation data	2	no	no	no	no	no	no	no	no	no	no	yes	no	CPAP, BiPAP, high flow nasal cannulae	Neither	36.9	6.54625	26.8855	26	27	0
121	Derivation data	2	no	no	no	no	no	no	no	no	no	no	no	no	CPAP, BiPAP, high flow nasal cannulae	Neither	36.9	6.54625	26.8855	27	28	0
122	Derivation data	17	no	no	no	no	yes	no	no	no	no	no	no	no	Oxygen supplementation	Lethargy only	36.4	-30.1038	-123.432	0	0.5	0
122	Derivation data	17	no	no	no	no	yes	no	no	no	no	no	no	no	Oxygen supplementation	Lethargy only	36.4	-30.1038	-123.432	0.5	1	0
122	Derivation data	17	no	no	no	no	yes	no	no	no	no	no	no	no	Oxygen supplementation	Lethargy only	36.4	-30.1038	-123.432	1	2	0
122	Derivation data	17	no	no	no	no	yes	no	no	no	no	no	no	no	Oxygen supplementation	Neither	36.7	-8.17381	-33.5477	2	3	0
122	Derivation data	17	no	no	no	no	yes	no	no	no	no	no	no	no	Oxygen supplementation	Neither	36.9	6.54625	26.8855	3	4	0
122	Derivation data	17	no	no	no	no	yes	no	no	no	no	no	no	no	Oxygen supplementation	Neither	37.1	21.346	87.7262	4	5	0
122	Derivation data	17	no	no	no	yes	yes	no	no	no	no	no	no	no	None	Neither	36.8	-0.82392	-3.38273	5	6	0
123	Derivation data	11	no	yes	no	yes	no	no	no	no	no	no	no	no	None	Reduced/no movement	37	13.9361	57.2547	0	0.5	0
123	Derivation data	11	no	yes	no	yes	no	no	no	no	no	no	no	no	None	Reduced/no movement	37	13.9361	57.2547	0.5	1	0
123	Derivation data	11	no	yes	no	yes	no	no	no	no	no	no	no	no	None	Reduced/no movement	37	13.9361	57.2547	1	2	0
123	Derivation data	11	no	no	no	yes	no	no	no	no	no	no	no	no	None	Neither	37.2	28.7762	118.301	2	3	0
123	Derivation data	11	no	no	no	yes	no	no	no	no	no	no	no	no	None	Neither	37	13.9361	57.2547	3	4	0
124	Derivation data	12	no	yes	no	yes	no	no	no	no	no	no	no	no	None	Lethargy only	39	165.936	686.185	0	0.5	0
124	Derivation data	12	no	yes	no	yes	no	no	no	no	no	no	no	no	None	Lethargy only	39	165.936	686.185	0.5	1	0
124	Derivation data	12	no	yes	no	yes	no	no	no	no	no	no	no	no	None	Neither	38	88.9361	366.583	1	2	0
124	Derivation data	12	no	yes	no	no	no	no	yes	no	no	no	no	no	None	Neither	37.9	81.3463	335.189	2	3	0
124	Derivation data	12	no	yes	no	no	no	no	yes	no	no	no	no	no	None	Neither	38	88.9361	366.583	3	4	0
124	Derivation data	12	no	yes	no	no	no	no	no	no	no	no	no	no	None	Neither	37	13.9361	57.2547	4	5	0
124	Derivation data	12	no	no	no	no	no	no	no	no	no	no	no	no	None	Neither	36.5	-22.8139	-93.5726	5	6	0
124	Derivation data	12	no	no	no	no	no	no	no	no	no	no	no	no	None	Neither	37	13.9361	57.2547	6	7	0
124	Derivation data	12	no	no	no	no	no	no	no	no	no	no	no	no	None	Neither	36.9	6.54625	26.8855	7	8	0
124	Derivation data	12	no	no	no	no	no	no	no	no	no	no	no	no	None	Neither	36.4	-30.1038	-123.432	8	9	0
124	Derivation data	12	no	no	no	no	no	no	no	no	no	no	no	no	None	Neither	36.8	-0.82392	-3.38273	9	10	0
124	Derivation data	12	no	no	no	no	no	no	no	no	no	no	no	no	None	Neither	36.5	-22.8139	-93.5726	10	11	0
124	Derivation data	12	no	no	no	no	no	no	no	no	no	no	no	no	None	Neither	36.9	6.54625	26.8855	11	12	0
124	Derivation data	12	no	no	no	no	no	no	no	no	no	no	no	no	None	Neither	36.6	-15.504	-63.6117	12	13	0
124	Derivation data	12	no	no	no	no	no	no	no	no	no	no	no	no	None	Neither	37.2	28.7762	118.301	13	14	0
124	Derivation data	12	no	no	no	no	no	no	no	no	no	no	no	no	None	Neither	36.9	6.54625	26.8855	14	15	0
125	Derivation data	2	no	no	no	no	yes	no	yes	no	no	no	no	no	None	Lethargy only	37.2	28.7762	118.301	0	0.5	0
125	Derivation data	2	no	no	no	no	yes	no	yes	no	no	no	no	no	None	Lethargy only	37.2	28.7762	118.301	0.5	1	0
125	Derivation data	2	no	no	no	no	yes	no	yes	no	no	no	no	no	None	Lethargy only	37.2	28.7762	118.301	1	2	0
125	Derivation data	2	no	no	no	no	no	no	yes	no	no	no	no	no	CPAP, BiPAP, high flow nasal cannulae	Neither	37.3	36.2261	148.977	2	3	0
125	Derivation data	2	no	no	no	no	no	no	yes	no	no	no	no	no	CPAP, BiPAP, high flow nasal cannulae	Neither	37.4	43.6962	179.757	3	4	0
125	Derivation data	2	no	no	no	no	no	no	yes	no	no	no	no	no	CPAP, BiPAP, high flow nasal cannulae	Neither	37.4	43.6962	179.757	4	5	0
125	Derivation data	2	no	no	no	no	no	no	yes	no	no	no	no	no	CPAP, BiPAP, high flow nasal cannulae	Neither	37.8	73.7761	303.896	5	6	0
125	Derivation data	2	no	no	no	no	no	no	yes	no	no	no	no	no	CPAP, BiPAP, high flow nasal cannulae	Neither	37.6	58.696	241.621	6	7	0
125	Derivation data	2	no	no	no	no	no	no	yes	no	no	no	no	no	None	Neither	37.2	28.7762	118.301	7	8	0
125	Derivation data	2	no	no	no	no	no	no	no	no	no	no	no	no	None	Neither	37.4	43.6962	179.757	8	9	0
126	Derivation data	7	no	no	no	yes	yes	yes	no	no	no	no	no	no	CPAP, BiPAP, high flow nasal cannulae	Neither	36.4	-30.1038	-123.432	0	0.5	0
126	Derivation data	7	no	no	no	yes	yes	yes	no	no	no	no	no	no	CPAP, BiPAP, high flow nasal cannulae	Neither	36.4	-30.1038	-123.432	0.5	1	0
126	Derivation data	7	no	no	no	yes	yes	yes	no	no	no	no	no	no	CPAP, BiPAP, high flow nasal cannulae	Neither	36.4	-30.1038	-123.432	1	2	0
126	Derivation data	7	no	no	yes	no	yes	no	no	no	no	no	no	no	CPAP, BiPAP, high flow nasal cannulae	Neither	36.9	6.54625	26.8855	2	3	0
126	Derivation data	7	no	no	no	yes	yes	no	no	no	no	no	no	no	CPAP, BiPAP, high flow nasal cannulae	Neither	36.7	-8.17381	-33.5477	3	4	0
126	Derivation data	7	no	no	no	yes	yes	no	no	no	no	no	no	no	CPAP, BiPAP, high flow nasal cannulae	Neither	37	13.9361	57.2547	4	5	0
126	Derivation data	7	no	no	no	yes	yes	no	no	no	no	no	no	no	CPAP, BiPAP, high flow nasal cannulae	Neither	36.9	6.54625	26.8855	5	6	0
126	Derivation data	7	no	no	no	no	yes	no	no	no	no	no	no	no	CPAP, BiPAP, high flow nasal cannulae	Neither	36.7	-8.17381	-33.5477	6	7	0
126	Derivation data	7	no	no	no	yes	yes	no	no	no	no	no	no	no	CPAP, BiPAP, high flow nasal cannulae	Neither	36.9	6.54625	26.8855	7	8	0
126	Derivation data	7	no	no	no	no	yes	no	no	no	no	no	no	no	CPAP, BiPAP, high flow nasal cannulae	Neither	36.7	-8.17381	-33.5477	8	9	0
126	Derivation data	7	no	no	no	yes	no	no	no	no	no	no	no	no	None	Neither	37	13.9361	57.2547	9	10	0
126	Derivation data	7	no	no	no	no	no	no	no	no	no	no	no	no	None	Neither	37	13.9361	57.2547	10	11	0
126	Derivation data	7	no	no	no	yes	no	no	no	no	no	no	no	no	None	Neither	36.9	6.54625	26.8855	11	12	0
126	Derivation data	7	no	no	no	no	no	no	no	no	no	no	no	no	None	Neither	36.7	-8.17381	-33.5477	12	13	0
126	Derivation data	7	no	no	no	no	no	no	no	no	no	no	no	no	None	Neither	36.8	-0.82392	-3.38273	13	14	0
126	Derivation data	7	no	no	no	yes	no	no	no	no	no	no	no	no	None	Neither	36.7	-8.17381	-33.5477	14	15	0
127	Validation data	8	yes	yes	no	no	yes	yes	no	no	no	no	no	no	Invasive ventilation	Neither	37.7	66.2262	272.708	0	0.5	0
127	Validation data	8	yes	yes	no	no	yes	yes	no	no	no	no	no	no	Invasive ventilation	Neither	37.7	66.2262	272.708	0.5	1	0
127	Validation data	8	no	no	no	no	yes	no	no	no	no	no	no	no	Invasive ventilation	Neither	37	13.9361	57.2547	1	2	0
127	Validation data	8	no	no	no	no	yes	no	no	no	no	no	no	no	Invasive ventilation	Neither	37.7	66.2262	272.708	2	3	0
127	Validation data	8	no	no	no	yes	yes	no	no	no	no	no	no	no	Invasive ventilation	Neither	37.5	51.1861	210.638	3	4	0
127	Validation data	8	no	no	no	no	yes	no	no	no	no	no	no	no	Invasive ventilation	Neither	37.2	28.7762	118.301	4	5	0
127	Validation data	8	no	no	no	no	yes	no	no	no	no	no	no	no	Invasive ventilation	Neither	37	13.9361	57.2547	5	6	0
127	Validation data	8	no	no	no	no	yes	no	no	no	no	no	no	no	Oxygen supplementation	Neither	37.4	43.6962	179.757	6	7	0
127	Validation data	8	no	no	no	no	yes	no	no	no	no	no	no	no	Oxygen supplementation	Neither	37	13.9361	57.2547	7	8	0
127	Validation data	8	no	no	no	no	no	no	no	no	no	no	no	no	Oxygen supplementation	Neither	37	13.9361	57.2547	8	9	0
127	Validation data	8	no	no	no	no	no	no	no	no	no	no	no	no	Oxygen supplementation	Neither	38	88.9361	366.583	9	10	0
127	Validation data	8	no	no	no	no	no	no	no	no	no	no	no	no	Oxygen supplementation	Neither	37.5	51.1861	210.638	10	11	0
127	Validation data	8	no	no	no	no	no	no	no	no	no	no	no	no	Oxygen supplementation	Neither	37.3	36.2261	148.977	11	12	0
127	Validation data	8	no	no	no	no	yes	no	no	no	no	no	no	no	None	Neither	37.4	43.6962	179.757	12	13	0
127	Validation data	8	no	no	no	no	yes	no	no	no	no	no	no	no	None	Neither	37.4	43.6962	179.757	13	14	0
127	Validation data	8	no	no	no	no	no	no	no	no	no	no	no	no	None	Neither	37	13.9361	57.2547	14	15	0
127	Validation data	8	no	no	no	no	no	no	no	no	no	no	no	no	None	Neither	37.3	36.2261	148.977	15	16	0
127	Validation data	8	no	no	no	no	no	no	no	no	no	no	no	no	None	Neither	37.5	51.1861	210.638	16	17	0
127	Validation data	8	no	no	no	no	no	no	no	no	no	no	no	no	None	Neither	37.5	51.1861	210.638	17	18	0
127	Validation data	8	no	no	no	no	no	no	no	no	no	no	no	no	None	Neither	37.1	21.346	87.7262	18	19	0
128	Derivation data	11	no	yes	no	no	no	no	no	no	no	no	no	no	None	Neither	37	13.9361	57.2547	0	0.5	0
128	Derivation data	11	no	yes	no	no	no	no	no	no	no	no	no	no	None	Neither	37	13.9361	57.2547	0.5	1	0
128	Derivation data	11	no	no	no	no	no	no	no	no	no	no	no	no	None	Neither	37.1	21.346	87.7262	1	2	0
128	Derivation data	11	no	no	no	no	no	no	no	no	no	no	no	no	None	Neither	37	13.9361	57.2547	2	3	0
128	Derivation data	11	no	no	no	no	no	no	no	no	no	no	no	no	None	Neither	37	13.9361	57.2547	3	4	0
128	Derivation data	11	no	no	no	no	no	no	no	no	no	no	no	no	None	Neither	37.2	28.7762	118.301	4	5	0
128	Derivation data	11	no	no	no	no	no	no	no	no	no	no	no	no	None	Neither	37.2	28.7762	118.301	5	6	0
128	Derivation data	11	no	no	no	no	no	no	no	no	no	no	no	no	None	Neither	37	13.9361	57.2547	6	7	0
129	Derivation data	14	no	no	yes	no	yes	no	no	no	yes	yes	no	no	Invasive ventilation	Neither	36.8	-0.82392	-3.38273	0	0.5	0
129	Derivation data	14	no	no	yes	no	yes	no	no	no	yes	yes	no	no	Invasive ventilation	Neither	36.8	-0.82392	-3.38273	0.5	1	0
129	Derivation data	14	no	no	yes	no	yes	no	no	no	yes	yes	no	no	Invasive ventilation	Neither	36.8	-0.82392	-3.38273	1	2	0
129	Derivation data	14	no	no	no	no	yes	no	no	no	yes	yes	no	no	Invasive ventilation	Neither	36.7	-8.17381	-33.5477	2	3	0
129	Derivation data	14	no	no	no	no	yes	no	no	no	no	no	no	no	Invasive ventilation	Neither	36.6	-15.504	-63.6117	3	4	0
129	Derivation data	14	no	no	no	yes	yes	no	no	no	no	no	no	no	Invasive ventilation	Neither	36.8	-0.82392	-3.38273	4	5	0
129	Derivation data	14	no	no	no	yes	yes	no	no	no	no	no	no	no	Invasive ventilation	Neither	36.5	-22.8139	-93.5726	5	6	0
129	Derivation data	14	no	no	no	no	yes	no	no	no	no	no	no	no	CPAP, BiPAP, high flow nasal cannulae	Neither	36.8	-0.82392	-3.38273	6	7	1
130	Derivation data	18	no	yes	yes	no	no	no	yes	no	no	no	no	no	None	Neither	36.2	-44.6238	-182.845	0	0.5	0
130	Derivation data	18	no	yes	yes	no	no	no	yes	no	no	no	no	no	None	Neither	36.2	-44.6238	-182.845	0.5	1	0
130	Derivation data	18	no	no	no	no	no	no	no	no	no	no	no	no	None	Neither	35.7	-80.5738	-329.598	1	2	0
130	Derivation data	18	no	no	no	no	no	no	no	no	no	no	no	no	None	Neither	36.4	-30.1038	-123.432	2	3	0
130	Derivation data	18	no	no	no	no	no	no	no	no	no	no	no	no	None	Neither	36.9	6.54625	26.8855	3	4	0
130	Derivation data	18	no	no	no	no	no	no	no	no	no	no	no	no	None	Neither	35.8	-73.4239	-300.451	4	5	0
130	Derivation data	18	no	no	no	no	no	no	no	no	no	no	no	no	None	Neither	36.5	-22.8139	-93.5726	5	6	0
130	Derivation data	18	no	no	no	no	no	no	no	no	no	no	no	no	None	Neither	36.6	-15.504	-63.6117	6	7	0
131	Derivation data	11	no	yes	no	no	yes	no	no	no	no	yes	no	no	CPAP, BiPAP, high flow nasal cannulae	Reduced/no movement	36.9	6.54625	26.8855	0	0.5	0
131	Derivation data	11	no	yes	no	no	yes	no	no	no	no	yes	no	no	CPAP, BiPAP, high flow nasal cannulae	Reduced/no movement	36.9	6.54625	26.8855	0.5	1	0
131	Derivation data	11	no	yes	no	no	yes	no	no	no	no	yes	no	no	CPAP, BiPAP, high flow nasal cannulae	Reduced/no movement	36.9	6.54625	26.8855	1	2	0
131	Derivation data	11	no	yes	no	no	yes	no	no	no	no	yes	no	no	CPAP, BiPAP, high flow nasal cannulae	Reduced/no movement	36.9	6.54625	26.8855	2	3	0
131	Derivation data	11	no	yes	no	no	yes	no	no	no	no	no	no	no	CPAP, BiPAP, high flow nasal cannulae	Neither	36.8	-0.82392	-3.38273	3	4	0
131	Derivation data	11	no	yes	no	no	yes	no	no	no	no	no	no	no	CPAP, BiPAP, high flow nasal cannulae	Neither	36.8	-0.82392	-3.38273	4	5	0
131	Derivation data	11	no	yes	no	no	yes	no	no	no	no	no	no	no	CPAP, BiPAP, high flow nasal cannulae	Neither	36.9	6.54625	26.8855	5	6	0
131	Derivation data	11	no	yes	no	no	yes	no	no	no	no	no	no	no	CPAP, BiPAP, high flow nasal cannulae	Neither	36.9	6.54625	26.8855	6	7	0
131	Derivation data	11	no	yes	no	no	yes	no	no	no	no	no	no	no	Oxygen supplementation	Neither	36.7	-8.17381	-33.5477	7	8	0
131	Derivation data	11	no	yes	no	no	yes	no	no	no	no	no	no	no	Oxygen supplementation	Neither	36.9	6.54625	26.8855	8	9	0
131	Derivation data	11	no	yes	no	no	yes	no	no	no	no	no	no	no	Oxygen supplementation	Neither	37	13.9361	57.2547	9	10	0
131	Derivation data	11	no	yes	no	no	yes	no	no	no	no	no	no	no	Oxygen supplementation	Neither	37	13.9361	57.2547	10	11	0
131	Derivation data	11	no	yes	no	no	yes	no	no	no	no	no	no	no	Oxygen supplementation	Neither	37	13.9361	57.2547	11	12	0
131	Derivation data	11	no	yes	no	no	yes	no	no	no	no	no	no	no	Oxygen supplementation	Neither	37	13.9361	57.2547	12	13	0
131	Derivation data	11	no	yes	no	no	yes	no	no	no	no	no	no	no	Oxygen supplementation	Neither	36.7	-8.17381	-33.5477	13	14	0
131	Derivation data	11	no	yes	no	no	yes	no	no	no	no	no	no	no	Oxygen supplementation	Neither	36.8	-0.82392	-3.38273	14	15	0
131	Derivation data	11	no	yes	no	no	yes	no	no	no	no	no	no	no	Oxygen supplementation	Neither	37	13.9361	57.2547	15	16	0
131	Derivation data	11	no	yes	no	no	yes	no	no	no	no	no	no	no	Oxygen supplementation	Neither	37	13.9361	57.2547	16	17	0
131	Derivation data	11	no	no	no	no	yes	no	no	no	no	no	no	no	Oxygen supplementation	Neither	37	13.9361	57.2547	17	18	0
131	Derivation data	11	no	no	no	no	yes	no	no	no	no	no	no	no	Oxygen supplementation	Neither	37	13.9361	57.2547	18	19	0
132	Derivation data	2	no	yes	no	no	no	no	no	no	no	no	no	no	None	Neither	37.1	21.346	87.7262	0	0.5	0
132	Derivation data	2	no	yes	no	no	no	no	no	no	no	no	no	no	None	Neither	37.1	21.346	87.7262	0.5	1	0
132	Derivation data	2	no	no	no	no	no	no	no	no	no	no	no	no	None	Neither	36.8	-0.82392	-3.38273	1	2	0
132	Derivation data	2	no	no	no	no	no	no	no	no	no	no	no	no	None	Neither	37.4	43.6962	179.757	2	3	0
132	Derivation data	2	no	no	no	no	no	no	no	no	no	no	no	no	None	Neither	37.2	28.7762	118.301	3	4	0
132	Derivation data	2	no	no	no	no	no	no	no	no	no	no	no	no	None	Neither	37.2	28.7762	118.301	4	5	0
132	Derivation data	2	no	no	no	no	no	no	no	no	no	no	no	no	None	Neither	37.3	36.2261	148.977	5	6	0
132	Derivation data	2	no	no	no	no	no	no	no	no	no	no	no	no	None	Neither	37.1	21.346	87.7262	6	7	0
132	Derivation data	2	no	no	no	no	no	no	no	no	no	no	no	no	None	Neither	37.4	43.6962	179.757	7	8	0
132	Derivation data	2	no	no	no	no	no	no	no	no	no	no	no	no	None	Neither	37.3	36.2261	148.977	8	9	0
132	Derivation data	2	no	no	no	no	no	no	no	no	no	no	no	no	None	Neither	36.8	-0.82392	-3.38273	9	10	0
132	Derivation data	2	no	no	no	no	no	no	no	no	no	no	no	no	None	Neither	37.4	43.6962	179.757	10	11	0
133	Validation data	7	no	no	yes	no	yes	yes	yes	no	yes	no	no	no	Invasive ventilation	Neither	36.5	-22.8139	-93.5726	0	0.5	0
133	Validation data	7	no	no	yes	no	yes	yes	yes	no	yes	no	no	no	Invasive ventilation	Neither	36.5	-22.8139	-93.5726	0.5	1	0
133	Validation data	7	no	no	yes	no	yes	yes	yes	no	yes	no	no	no	Invasive ventilation	Neither	36.5	-22.8139	-93.5726	1	2	0
133	Validation data	7	no	no	no	yes	yes	no	no	no	no	no	no	no	Invasive ventilation	Neither	36.7	-8.17381	-33.5477	2	3	0
133	Validation data	7	no	no	no	no	yes	no	no	no	no	no	no	no	Invasive ventilation	Neither	36.9	6.54625	26.8855	3	4	0
133	Validation data	7	no	no	no	yes	yes	no	no	no	no	no	no	no	Invasive ventilation	Neither	36.8	-0.82392	-3.38273	4	5	0
133	Validation data	7	no	no	no	yes	yes	no	no	no	no	no	no	no	Invasive ventilation	Neither	36.7	-8.17381	-33.5477	5	6	0
133	Validation data	7	no	no	no	yes	yes	no	no	no	no	no	no	no	Invasive ventilation	Neither	36.7	-8.17381	-33.5477	6	7	0
133	Validation data	7	no	no	no	yes	yes	no	no	no	no	no	no	no	Invasive ventilation	Neither	37	13.9361	57.2547	7	8	0
133	Validation data	7	no	no	no	yes	yes	no	no	no	no	no	no	no	Invasive ventilation	Neither	36.7	-8.17381	-33.5477	8	9	0
133	Validation data	7	no	no	no	no	yes	no	no	no	no	no	no	no	Invasive ventilation	Neither	36.9	6.54625	26.8855	9	10	0
133	Validation data	7	no	no	no	no	no	no	no	no	no	no	no	no	None	Neither	36.8	-0.82392	-3.38273	10	11	0
133	Validation data	7	no	no	no	no	no	no	no	no	no	no	no	no	None	Neither	36.9	6.54625	26.8855	11	12	0
133	Validation data	7	no	no	no	no	no	no	no	no	no	no	no	no	None	Neither	36.8	-0.82392	-3.38273	12	13	0
133	Validation data	7	no	no	no	no	no	no	no	no	no	no	no	no	None	Neither	36.9	6.54625	26.8855	13	14	0
133	Validation data	7	no	no	no	no	no	no	no	no	no	no	no	no	None	Neither	36.8	-0.82392	-3.38273	14	15	0
133	Validation data	7	no	no	no	no	no	no	no	no	no	no	no	no	None	Neither	36.7	-8.17381	-33.5477	15	16	0
133	Validation data	7	no	no	no	no	no	no	no	no	no	no	no	no	None	Neither	36.7	-8.17381	-33.5477	16	17	0
133	Validation data	7	no	no	no	no	no	no	no	no	no	no	no	no	None	Neither	36.6	-15.504	-63.6117	17	18	0
133	Validation data	7	no	no	no	no	no	no	no	no	no	no	no	no	None	Neither	36.8	-0.82392	-3.38273	18	19	0
133	Validation data	7	no	no	no	no	no	no	no	no	no	no	no	no	None	Neither	36.8	-0.82392	-3.38273	19	20	0
133	Validation data	7	no	no	no	no	no	no	no	no	no	no	no	no	None	Neither	36.6	-15.504	-63.6117	20	21	0
133	Validation data	7	no	no	no	no	no	no	no	no	no	no	no	no	None	Neither	36.6	-15.504	-63.6117	21	22	0
134	Derivation data	17	no	no	no	no	yes	yes	no	no	yes	no	no	no	Oxygen supplementation	Lethargy only	36.4	-30.1038	-123.432	0	0.5	0
134	Derivation data	17	no	no	no	no	yes	yes	no	no	yes	no	no	no	Oxygen supplementation	Lethargy only	36.4	-30.1038	-123.432	0.5	1	0
134	Derivation data	17	no	no	no	no	no	no	no	no	no	no	no	no	None	Neither	37.6	58.696	241.621	1	2	0
134	Derivation data	17	no	no	no	no	no	no	no	no	no	no	no	no	None	Neither	37	13.9361	57.2547	2	3	0
134	Derivation data	17	no	no	no	no	no	no	no	no	no	no	no	no	None	Neither	37.6	58.696	241.621	3	4	0
134	Derivation data	17	no	no	no	no	no	no	no	no	no	no	no	no	None	Neither	36.4	-30.1038	-123.432	4	5	0
134	Derivation data	17	no	no	no	no	no	no	no	no	no	no	no	no	None	Neither	37.6	58.696	241.621	5	6	0
134	Derivation data	17	no	no	no	no	no	no	no	no	no	no	no	no	None	Neither	37.3	36.2261	148.977	6	7	0
135	Derivation data	10	no	no	no	no	yes	no	no	no	no	no	no	no	None	Neither	38.2	104.176	429.68	0	0.5	0
135	Derivation data	10	no	no	no	no	yes	no	no	no	no	no	no	no	None	Neither	38.2	104.176	429.68	0.5	1	0
135	Derivation data	10	no	no	no	no	no	no	no	no	no	no	no	yes	None	Neither	38	88.9361	366.583	1	2	0
135	Derivation data	10	no	no	no	no	no	no	no	no	no	no	no	no	None	Neither	38.4	119.496	493.188	2	3	0
135	Derivation data	10	no	no	no	no	no	no	no	no	no	no	no	no	None	Neither	38.4	119.496	493.188	3	4	0
135	Derivation data	10	no	no	no	no	no	no	no	no	no	no	no	no	None	Neither	38.1	96.546	398.079	4	5	0
135	Derivation data	10	no	no	no	no	no	no	no	no	no	no	no	no	None	Neither	38	88.9361	366.583	5	6	0
136	Derivation data	4	no	yes	no	no	no	yes	yes	no	no	no	no	no	None	Neither	36.5	-22.8139	-93.5726	0	0.5	0
136	Derivation data	4	no	yes	no	no	no	yes	yes	no	no	no	no	no	None	Neither	36.5	-22.8139	-93.5726	0.5	1	0
136	Derivation data	4	no	yes	no	yes	no	no	yes	no	no	no	no	no	None	Neither	36.8	-0.82392	-3.38273	1	2	0
136	Derivation data	4	no	yes	no	yes	no	no	yes	no	no	no	no	no	None	Neither	36.7	-8.17381	-33.5477	2	3	0
136	Derivation data	4	no	yes	no	yes	no	no	yes	no	no	no	no	no	None	Neither	36.6	-15.504	-63.6117	3	4	0
136	Derivation data	4	no	yes	no	yes	no	no	yes	no	no	no	no	no	None	Neither	36.8	-0.82392	-3.38273	4	5	0
136	Derivation data	4	no	yes	no	yes	no	no	yes	no	no	no	no	no	None	Neither	36.7	-8.17381	-33.5477	5	6	0
136	Derivation data	4	no	yes	no	yes	no	no	no	no	no	no	no	no	None	Neither	36.5	-22.8139	-93.5726	6	7	0
136	Derivation data	4	no	yes	no	yes	no	no	no	no	no	no	no	no	None	Neither	36.8	-0.82392	-3.38273	7	8	0
136	Derivation data	4	no	no	no	yes	no	no	no	no	no	no	no	no	None	Neither	36.9	6.54625	26.8855	8	9	0
136	Derivation data	4	no	no	no	yes	no	no	no	no	no	no	no	no	None	Neither	36.8	-0.82392	-3.38273	9	10	0
136	Derivation data	4	no	no	no	yes	no	no	no	no	no	no	no	no	None	Neither	36.8	-0.82392	-3.38273	10	11	0
136	Derivation data	4	no	no	no	yes	no	no	no	no	no	no	no	no	None	Neither	36.9	6.54625	26.8855	11	12	0
136	Derivation data	4	no	no	no	yes	no	no	no	no	no	no	no	no	None	Neither	36.8	-0.82392	-3.38273	12	13	0
136	Derivation data	4	no	no	no	yes	no	no	no	no	no	no	no	no	None	Neither	36.5	-22.8139	-93.5726	13	14	0
136	Derivation data	4	no	no	no	yes	no	no	no	no	no	no	no	no	None	Neither	36.7	-8.17381	-33.5477	14	15	0
136	Derivation data	4	no	no	no	yes	no	no	no	no	no	no	no	no	None	Neither	36.7	-8.17381	-33.5477	15	16	0
136	Derivation data	4	no	no	no	yes	no	no	no	no	no	no	no	no	None	Neither	36.6	-15.504	-63.6117	16	17	0
136	Derivation data	4	no	no	no	yes	no	no	no	no	no	no	no	no	None	Neither	36.9	6.54625	26.8855	17	18	0
136	Derivation data	4	no	no	no	no	no	no	no	no	no	no	no	no	None	Neither	36.5	-22.8139	-93.5726	18	19	0
136	Derivation data	4	no	no	no	no	no	no	no	no	no	no	no	no	None	Neither	36.6	-15.504	-63.6117	19	20	0
136	Derivation data	4	no	no	no	yes	no	no	no	no	no	no	no	no	None	Neither	36.9	6.54625	26.8855	20	21	0
137	Derivation data	14	no	no	no	no	yes	no	no	no	no	no	no	no	CPAP, BiPAP, high flow nasal cannulae	Neither	36.8	-0.82392	-3.38273	0	0.5	0
137	Derivation data	14	no	no	no	no	yes	no	no	no	no	no	no	no	CPAP, BiPAP, high flow nasal cannulae	Neither	36.8	-0.82392	-3.38273	0.5	1	0
137	Derivation data	14	no	no	no	yes	yes	no	no	no	no	no	no	no	CPAP, BiPAP, high flow nasal cannulae	Neither	36.7	-8.17381	-33.5477	1	2	0
137	Derivation data	14	no	no	no	yes	yes	no	no	no	no	no	no	no	CPAP, BiPAP, high flow nasal cannulae	Neither	36.6	-15.504	-63.6117	2	3	0
137	Derivation data	14	no	no	no	no	yes	no	no	no	no	no	no	no	CPAP, BiPAP, high flow nasal cannulae	Neither	37.1	21.346	87.7262	3	4	0
137	Derivation data	14	no	no	no	no	yes	no	no	no	no	no	no	no	Oxygen supplementation	Neither	37	13.9361	57.2547	4	5	0
137	Derivation data	14	no	no	no	no	yes	no	no	no	no	no	no	no	Oxygen supplementation	Neither	36.9	6.54625	26.8855	5	6	0
137	Derivation data	14	no	no	no	no	yes	no	no	no	no	no	no	no	Oxygen supplementation	Neither	36.7	-8.17381	-33.5477	6	7	0
137	Derivation data	14	no	no	no	no	yes	no	no	no	no	no	no	no	Oxygen supplementation	Neither	36.6	-15.504	-63.6117	7	8	0
137	Derivation data	14	no	no	no	no	yes	no	no	no	no	no	no	no	Oxygen supplementation	Neither	36.6	-15.504	-63.6117	8	9	0
137	Derivation data	14	no	no	no	no	yes	no	no	no	no	no	no	no	Oxygen supplementation	Neither	36.4	-30.1038	-123.432	9	10	0
137	Derivation data	14	no	no	no	no	no	no	no	no	no	no	no	no	None	Neither	36.6	-15.504	-63.6117	10	11	0
138	Derivation data	12	no	no	no	no	no	no	no	no	no	no	no	no	None	Neither	38	88.9361	366.583	0	0.5	0
138	Derivation data	12	no	no	no	no	no	no	no	no	no	no	no	no	None	Neither	38	88.9361	366.583	0.5	1	0
138	Derivation data	12	no	no	no	no	no	no	no	no	no	no	no	no	None	Neither	38	88.9361	366.583	1	2	0
138	Derivation data	12	no	no	no	no	no	no	no	no	no	no	no	no	None	Neither	37	13.9361	57.2547	2	3	0
138	Derivation data	12	no	no	no	no	no	no	no	no	no	no	no	no	None	Neither	36.8	-0.82392	-3.38273	3	4	0
138	Derivation data	12	no	no	no	no	no	no	no	no	no	no	no	no	None	Neither	37.2	28.7762	118.301	4	5	0
138	Derivation data	12	no	no	no	no	no	no	no	no	no	no	no	no	None	Neither	37	13.9361	57.2547	5	6	0
138	Derivation data	12	no	no	no	no	no	no	no	no	no	no	no	no	None	Neither	37.2	28.7762	118.301	6	7	0
138	Derivation data	12	no	no	no	no	no	no	no	no	no	no	no	no	None	Neither	36.5	-22.8139	-93.5726	7	8	0
138	Derivation data	12	no	no	no	no	no	no	no	no	no	no	no	no	None	Neither	36.9	6.54625	26.8855	8	9	0
138	Derivation data	12	no	no	no	no	no	no	no	no	no	no	no	no	None	Neither	36.5	-22.8139	-93.5726	9	10	0
138	Derivation data	12	no	no	no	no	no	no	no	no	no	no	no	no	None	Neither	37	13.9361	57.2547	10	11	0
138	Derivation data	12	no	no	no	no	no	no	no	no	no	no	no	no	None	Neither	36.8	-0.82392	-3.38273	11	12	0
138	Derivation data	12	no	no	no	no	no	no	no	no	no	no	no	no	None	Neither	37	13.9361	57.2547	12	13	0
139	Derivation data	5	no	yes	no	no	no	no	yes	no	no	yes	yes	no	None	Lethargy only	36.5	-22.8139	-93.5726	0	0.5	0
139	Derivation data	5	no	yes	no	no	no	no	yes	no	no	yes	yes	no	None	Lethargy only	36.5	-22.8139	-93.5726	0.5	1	0
139	Derivation data	5	no	yes	no	no	no	no	yes	no	no	yes	yes	no	None	Lethargy only	36.5	-22.8139	-93.5726	1	2	0
139	Derivation data	5	no	no	no	no	no	no	no	no	no	no	no	no	None	Neither	36.5	-22.8139	-93.5726	2	3	0
139	Derivation data	5	no	no	no	no	no	no	no	no	no	no	no	no	None	Neither	36.5	-22.8139	-93.5726	3	4	0
139	Derivation data	5	no	no	no	no	no	no	no	no	no	no	no	no	None	Neither	36.4	-30.1038	-123.432	4	5	0
139	Derivation data	5	no	no	no	no	no	no	no	no	no	no	no	no	None	Neither	36.6	-15.504	-63.6117	5	6	0
139	Derivation data	5	no	no	no	no	no	no	no	no	no	no	no	no	None	Neither	36.6	-15.504	-63.6117	6	7	0
139	Derivation data	5	no	no	no	no	no	no	no	no	no	no	no	no	None	Neither	36.5	-22.8139	-93.5726	7	8	0
140	Derivation data	6	no	no	yes	no	no	no	no	no	no	no	no	no	None	Neither	38.3	111.826	461.382	0	0.5	0
140	Derivation data	6	no	no	yes	no	no	no	no	no	no	no	no	no	None	Neither	38.3	111.826	461.382	0.5	1	0
140	Derivation data	6	no	no	no	no	no	no	no	no	no	no	no	no	None	Neither	36	-59.0639	-241.851	1	2	0
140	Derivation data	6	no	no	no	no	no	no	no	no	no	no	no	no	None	Neither	36.2	-44.6238	-182.845	2	3	0
140	Derivation data	6	no	no	no	no	no	no	no	no	no	no	no	no	None	Neither	36.3	-37.3739	-153.19	3	4	0
141	Validation data	7	no	no	no	no	no	yes	no	no	no	no	no	no	None	Neither	36.8	-0.82392	-3.38273	0	0.5	0
141	Validation data	7	no	no	no	no	no	yes	no	no	no	no	no	no	None	Neither	36.8	-0.82392	-3.38273	0.5	1	0
141	Validation data	7	no	no	no	no	no	no	no	no	no	no	no	no	None	Neither	36.7	-8.17381	-33.5477	1	2	0
141	Validation data	7	no	no	no	yes	no	no	no	no	no	no	no	no	None	Neither	36.7	-8.17381	-33.5477	2	3	0
141	Validation data	7	no	no	no	no	no	no	no	no	no	no	no	no	None	Neither	37	13.9361	57.2547	3	4	0
141	Validation data	7	no	no	no	no	no	no	no	no	no	no	no	no	None	Neither	36.7	-8.17381	-33.5477	4	5	0
142	Derivation data	15	no	no	no	no	yes	no	no	no	yes	yes	no	no	CPAP, BiPAP, high flow nasal cannulae	Lethargy only	37	13.9361	57.2547	0	0.5	0
142	Derivation data	15	no	no	no	no	yes	no	no	no	yes	yes	no	no	CPAP, BiPAP, high flow nasal cannulae	Lethargy only	37	13.9361	57.2547	0.5	1	0
142	Derivation data	15	no	yes	no	no	yes	no	no	no	no	no	no	yes	CPAP, BiPAP, high flow nasal cannulae	Neither	37	13.9361	57.2547	1	2	0
142	Derivation data	15	no	no	no	no	yes	no	no	no	no	no	no	no	CPAP, BiPAP, high flow nasal cannulae	Neither	37	13.9361	57.2547	2	3	0
142	Derivation data	15	no	no	no	no	yes	no	no	no	no	no	no	no	CPAP, BiPAP, high flow nasal cannulae	Lethargy only	36.8	-0.82392	-3.38273	3	4	0
142	Derivation data	15	yes	yes	no	no	yes	no	no	no	no	yes	no	no	Invasive ventilation	Neither	37.7	66.2262	272.708	4	5	0
142	Derivation data	15	no	yes	no	no	yes	no	no	no	no	no	no	no	Invasive ventilation	Neither	36.6	-15.504	-63.6117	5	6	0
142	Derivation data	15	yes	no	no	no	yes	no	no	no	no	no	no	no	Invasive ventilation	Reduced/no movement	37	13.9361	57.2547	6	7	1
143	Derivation data	16	no	yes	no	no	no	no	yes	no	no	no	no	no	None	Neither	36.8	-0.82392	-3.38273	0	0.5	0
143	Derivation data	16	no	yes	no	no	no	no	yes	no	no	no	no	no	None	Neither	36.8	-0.82392	-3.38273	0.5	1	0
143	Derivation data	16	no	yes	no	no	no	no	yes	no	no	no	no	no	None	Neither	36.8	-0.82392	-3.38273	1	2	0
143	Derivation data	16	no	yes	no	no	no	no	yes	no	no	no	no	no	None	Neither	36.9	6.54625	26.8855	2	4	0
144	Derivation data	12	yes	no	no	no	no	no	no	no	no	no	no	no	None	Neither	38.2	104.176	429.68	0	0.5	0
144	Derivation data	12	yes	no	no	no	no	no	no	no	no	no	no	no	None	Neither	38.2	104.176	429.68	0.5	1	0
144	Derivation data	12	yes	no	no	no	no	no	no	no	no	no	no	no	None	Neither	38.2	104.176	429.68	1	2	0
144	Derivation data	12	no	no	no	no	no	no	no	no	no	no	no	no	None	Neither	38	88.9361	366.583	2	3	0
144	Derivation data	12	no	no	no	no	no	no	no	no	no	no	no	no	None	Neither	36.8	-0.82392	-3.38273	3	4	0
144	Derivation data	12	no	no	no	no	no	no	no	no	no	no	no	no	None	Neither	37	13.9361	57.2547	4	5	0
144	Derivation data	12	no	no	no	no	no	no	no	no	no	no	no	no	None	Neither	37.2	28.7762	118.301	5	6	0
144	Derivation data	12	no	no	no	no	no	no	no	no	no	no	no	no	None	Neither	36.9	6.54625	26.8855	6	7	0
144	Derivation data	12	no	no	no	no	no	no	no	no	no	no	no	no	None	Neither	36.8	-0.82392	-3.38273	7	8	0
144	Derivation data	12	yes	no	no	no	yes	no	no	no	yes	no	no	no	Invasive ventilation	Neither	37	13.9361	57.2547	8	9	0
144	Derivation data	12	yes	yes	no	no	yes	no	no	no	no	no	no	no	Invasive ventilation	Neither	37	13.9361	57.2547	9	10	0
144	Derivation data	12	no	yes	no	no	yes	no	no	no	no	no	no	no	Invasive ventilation	Neither	37.1	21.346	87.7262	10	11	0
144	Derivation data	12	no	yes	no	no	yes	no	no	no	no	no	no	no	Invasive ventilation	Neither	36.8	-0.82392	-3.38273	11	12	0
144	Derivation data	12	no	yes	no	no	yes	no	yes	no	no	no	no	no	Invasive ventilation	Neither	37.4	43.6962	179.757	12	13	0
144	Derivation data	12	no	yes	no	no	yes	no	yes	no	no	no	no	no	Invasive ventilation	Neither	37	13.9361	57.2547	13	14	0
144	Derivation data	12	yes	yes	no	no	yes	no	yes	no	no	no	no	no	Invasive ventilation	Neither	36.9	6.54625	26.8855	14	15	0
144	Derivation data	12	no	no	no	no	yes	no	no	no	no	no	no	no	Oxygen supplementation	Neither	36.5	-22.8139	-93.5726	15	16	0
144	Derivation data	12	no	yes	no	no	no	no	no	no	no	no	no	no	None	Neither	36.6	-15.504	-63.6117	16	17	0
144	Derivation data	12	no	yes	no	no	no	no	no	no	no	no	no	no	None	Neither	36.8	-0.82392	-3.38273	17	18	0
144	Derivation data	12	no	no	no	no	no	no	no	no	no	no	no	no	None	Neither	37	13.9361	57.2547	18	19	0
144	Derivation data	12	no	no	no	no	no	no	no	no	no	no	no	no	None	Neither	36.5	-22.8139	-93.5726	19	20	0
144	Derivation data	12	no	no	no	no	yes	no	no	no	no	no	no	no	None	Neither	36.7	-8.17381	-33.5477	20	21	0
144	Derivation data	12	no	no	no	no	yes	no	no	no	no	no	no	no	None	Neither	36.7	-8.17381	-33.5477	21	22	0
144	Derivation data	12	no	no	no	no	yes	no	no	no	no	no	no	no	None	Neither	36.7	-8.17381	-33.5477	22	23	0
144	Derivation data	12	no	no	no	no	yes	no	no	no	no	no	no	no	None	Neither	37	13.9361	57.2547	23	24	0
144	Derivation data	12	no	no	no	no	yes	no	no	no	no	no	no	no	None	Neither	37	13.9361	57.2547	24	25	0
144	Derivation data	12	no	no	no	no	yes	no	no	no	no	no	no	no	None	Neither	37.2	28.7762	118.301	25	26	0
145	Derivation data	13	no	yes	no	no	yes	no	no	yes	no	no	no	no	CPAP, BiPAP, high flow nasal cannulae	Lethargy only	36.6	-15.504	-63.6117	0	0.5	0
145	Derivation data	13	no	yes	no	no	yes	no	no	yes	no	no	no	no	CPAP, BiPAP, high flow nasal cannulae	Lethargy only	36.6	-15.504	-63.6117	0.5	1	0
145	Derivation data	13	no	yes	no	no	yes	no	no	no	no	no	no	no	CPAP, BiPAP, high flow nasal cannulae	Neither	36.6	-15.504	-63.6117	1	2	0
145	Derivation data	13	yes	yes	no	no	yes	no	no	no	no	no	no	no	CPAP, BiPAP, high flow nasal cannulae	Neither	36.6	-15.504	-63.6117	2	3	0
145	Derivation data	13	yes	yes	no	no	yes	no	no	no	no	no	no	no	CPAP, BiPAP, high flow nasal cannulae	Neither	36.6	-15.504	-63.6117	3	4	0
145	Derivation data	13	yes	yes	no	no	yes	no	no	no	no	no	no	no	CPAP, BiPAP, high flow nasal cannulae	Neither	37	13.9361	57.2547	4	5	0
145	Derivation data	13	yes	yes	no	no	yes	no	no	no	no	no	no	no	None	Neither	36.6	-15.504	-63.6117	5	6	0
145	Derivation data	13	no	yes	no	no	no	no	no	no	no	no	no	no	None	Neither	36.6	-15.504	-63.6117	6	7	0
145	Derivation data	13	yes	yes	no	no	no	no	no	no	no	no	no	no	None	Neither	36.6	-15.504	-63.6117	7	8	0
145	Derivation data	13	yes	yes	no	no	no	no	no	no	no	no	no	no	None	Neither	36.8	-0.82392	-3.38273	8	9	0
145	Derivation data	13	yes	yes	no	no	no	no	no	no	no	no	no	no	None	Neither	36.8	-0.82392	-3.38273	9	10	0
145	Derivation data	13	yes	yes	no	no	no	no	no	no	no	no	no	no	None	Neither	36.6	-15.504	-63.6117	10	11	0
145	Derivation data	13	yes	yes	no	no	no	no	no	no	no	no	no	no	None	Neither	36.6	-15.504	-63.6117	11	12	0
145	Derivation data	13	yes	yes	no	no	no	no	no	no	no	no	no	no	None	Neither	36.6	-15.504	-63.6117	12	13	0
145	Derivation data	13	no	yes	no	no	no	no	no	no	no	no	no	no	None	Neither	36.6	-15.504	-63.6117	13	14	0
145	Derivation data	13	yes	yes	no	no	no	no	no	no	no	no	no	no	None	Neither	36.6	-15.504	-63.6117	14	15	0
145	Derivation data	13	no	no	no	no	no	no	no	no	no	no	no	no	None	Neither	36.6	-15.504	-63.6117	15	16	0
145	Derivation data	13	no	no	no	no	no	no	no	no	no	no	no	no	None	Neither	36.6	-15.504	-63.6117	16	17	0
145	Derivation data	13	no	no	no	no	no	no	no	no	no	no	no	no	None	Neither	36.6	-15.504	-63.6117	17	18	0
145	Derivation data	13	no	no	no	no	no	no	no	no	no	no	no	no	None	Neither	36.6	-15.504	-63.6117	18	19	0
145	Derivation data	13	no	no	no	no	yes	no	no	no	no	no	no	no	None	Neither	36.6	-15.504	-63.6117	19	20	0
145	Derivation data	13	no	no	no	no	yes	no	no	no	no	no	no	no	None	Neither	36.8	-0.82392	-3.38273	20	21	0
145	Derivation data	13	no	no	no	no	yes	no	no	no	no	no	no	no	None	Neither	36.6	-15.504	-63.6117	21	22	0
145	Derivation data	13	yes	no	no	no	yes	no	no	no	no	no	no	no	None	Neither	36.6	-15.504	-63.6117	22	23	0
145	Derivation data	13	no	yes	no	yes	no	no	no	no	no	no	no	no	None	Neither	36.6	-15.504	-63.6117	23	24	0
145	Derivation data	13	yes	yes	no	no	yes	no	no	no	no	no	no	no	None	Neither	36.6	-15.504	-63.6117	24	25	0
145	Derivation data	13	no	yes	no	no	yes	no	no	no	no	no	no	no	None	Neither	36.8	-0.82392	-3.38273	25	26	0
145	Derivation data	13	yes	yes	no	no	no	no	no	no	no	no	no	no	None	Neither	36.6	-15.504	-63.6117	26	27	0
146	Derivation data	9	yes	no	no	no	yes	no	no	no	no	no	no	no	Invasive ventilation	Neither	36.6	-15.504	-63.6117	0	0.5	0
146	Derivation data	9	yes	no	no	no	yes	no	no	no	no	no	no	no	Invasive ventilation	Neither	36.6	-15.504	-63.6117	0.5	1	0
146	Derivation data	9	yes	no	no	no	yes	no	no	no	no	no	no	no	Invasive ventilation	Neither	36.6	-15.504	-63.6117	1	2	0
146	Derivation data	9	no	no	no	no	yes	no	no	no	no	no	no	no	Invasive ventilation	Neither	36.4	-30.1038	-123.432	2	3	0
146	Derivation data	9	no	no	no	no	yes	no	no	no	no	no	no	no	Invasive ventilation	Neither	36.8	-0.82392	-3.38273	3	4	0
146	Derivation data	9	no	no	no	no	yes	no	no	no	no	no	no	no	Invasive ventilation	Neither	36.6	-15.504	-63.6117	4	5	0
146	Derivation data	9	no	no	no	no	yes	no	no	no	no	no	no	no	Oxygen supplementation	Neither	36.8	-0.82392	-3.38273	5	6	0
146	Derivation data	9	no	no	no	no	yes	no	no	no	no	no	no	no	Oxygen supplementation	Neither	37	13.9361	57.2547	6	7	0
146	Derivation data	9	no	no	no	no	yes	no	no	no	no	no	no	no	Invasive ventilation	Neither	37	13.9361	57.2547	7	8	0
146	Derivation data	9	no	no	no	no	no	no	no	no	no	no	no	no	CPAP, BiPAP, high flow nasal cannulae	Neither	37	13.9361	57.2547	8	9	0
147	Derivation data	19	yes	yes	yes	no	yes	no	yes	no	no	yes	no	no	CPAP, BiPAP, high flow nasal cannulae	Neither	35.3	-108.974	-445.173	0	0.5	0
147	Derivation data	19	yes	yes	yes	no	yes	no	yes	no	no	yes	no	no	CPAP, BiPAP, high flow nasal cannulae	Neither	35.3	-108.974	-445.173	0.5	1	0
147	Derivation data	19	yes	yes	yes	no	yes	no	yes	no	no	yes	no	no	CPAP, BiPAP, high flow nasal cannulae	Neither	35.3	-108.974	-445.173	1	2	0
147	Derivation data	19	yes	yes	yes	no	yes	no	yes	no	no	yes	no	no	CPAP, BiPAP, high flow nasal cannulae	Neither	35.3	-108.974	-445.173	2	3	0
147	Derivation data	19	yes	yes	yes	no	yes	no	no	no	no	no	no	no	CPAP, BiPAP, high flow nasal cannulae	Neither	36.5	-22.8139	-93.5726	3	4	0
147	Derivation data	19	yes	yes	no	no	yes	no	no	no	no	no	no	no	Oxygen supplementation	Neither	37	13.9361	57.2547	4	5	0
147	Derivation data	19	no	yes	no	no	no	no	no	no	no	no	no	no	None	Neither	36.5	-22.8139	-93.5726	5	6	0
147	Derivation data	19	no	no	no	no	no	no	no	no	no	no	no	no	None	Neither	36.9	6.54625	26.8855	6	7	0
147	Derivation data	19	no	no	no	no	no	no	no	no	no	no	no	no	None	Neither	36.6	-15.504	-63.6117	7	8	0
147	Derivation data	19	no	no	no	no	no	no	no	no	no	no	no	no	None	Neither	36.8	-0.82392	-3.38273	8	9	0
147	Derivation data	19	no	no	no	no	no	no	no	no	no	no	no	no	None	Neither	36.4	-30.1038	-123.432	9	10	0
147	Derivation data	19	no	no	no	no	no	no	no	no	no	no	no	no	None	Neither	36.9	6.54625	26.8855	10	11	0
147	Derivation data	19	no	no	no	no	no	no	no	no	no	no	no	no	None	Neither	36.3	-37.3739	-153.19	11	12	0
147	Derivation data	19	no	no	no	no	no	no	no	no	no	no	no	no	None	Neither	36.8	-0.82392	-3.38273	12	13	0
148	Derivation data	5	yes	no	no	yes	no	no	no	no	no	no	no	no	None	Lethargy only	36.9	6.54625	26.8855	0	0.5	0
148	Derivation data	5	yes	no	no	yes	no	no	no	no	no	no	no	no	None	Lethargy only	36.9	6.54625	26.8855	0.5	1	0
148	Derivation data	5	yes	no	no	yes	no	no	no	no	no	no	no	no	None	Lethargy only	36.9	6.54625	26.8855	1	2	0
148	Derivation data	5	yes	no	no	yes	yes	no	no	no	no	no	no	no	Invasive ventilation	Lethargy only	36.6	-15.504	-63.6117	2	3	0
148	Derivation data	5	no	no	no	no	yes	no	no	no	no	no	no	no	Invasive ventilation	Lethargy only	36.5	-22.8139	-93.5726	3	4	0
148	Derivation data	5	no	yes	no	no	yes	no	no	no	no	yes	no	no	Invasive ventilation	Neither	36.5	-22.8139	-93.5726	4	5	0
148	Derivation data	5	no	yes	no	no	yes	no	no	no	no	no	no	no	Invasive ventilation	Neither	36.6	-15.504	-63.6117	5	6	0
148	Derivation data	5	no	no	no	no	yes	no	no	no	no	no	no	no	Oxygen supplementation	Lethargy only	36.4	-30.1038	-123.432	6	7	0
148	Derivation data	5	yes	no	no	no	yes	no	no	no	no	no	no	no	Oxygen supplementation	Neither	36.4	-30.1038	-123.432	7	8	0
148	Derivation data	5	yes	no	no	no	yes	no	no	no	no	no	no	no	Oxygen supplementation	Neither	36.5	-22.8139	-93.5726	8	9	0
148	Derivation data	5	no	yes	no	no	yes	no	no	no	no	no	no	no	Oxygen supplementation	Neither	36.4	-30.1038	-123.432	9	10	0
148	Derivation data	5	yes	no	no	no	yes	no	no	no	no	no	no	no	Oxygen supplementation	Neither	36.5	-22.8139	-93.5726	10	11	0
148	Derivation data	5	yes	no	no	no	yes	no	no	no	no	no	no	no	CPAP, BiPAP, high flow nasal cannulae	Lethargy only	36.4	-30.1038	-123.432	11	12	0
148	Derivation data	5	no	yes	no	no	yes	no	no	no	no	no	no	no	CPAP, BiPAP, high flow nasal cannulae	Lethargy only	36.4	-30.1038	-123.432	12	13	0
148	Derivation data	5	yes	no	no	no	yes	no	no	no	no	no	no	no	CPAP, BiPAP, high flow nasal cannulae	Lethargy only	36.4	-30.1038	-123.432	13	14	0
148	Derivation data	5	yes	no	no	no	yes	no	no	no	no	no	no	no	CPAP, BiPAP, high flow nasal cannulae	Lethargy only	36.6	-15.504	-63.6117	14	15	0
148	Derivation data	5	no	no	no	no	yes	no	no	no	no	no	no	no	CPAP, BiPAP, high flow nasal cannulae	Neither	36.5	-22.8139	-93.5726	15	16	0
148	Derivation data	5	no	no	no	no	yes	no	no	no	no	no	no	no	CPAP, BiPAP, high flow nasal cannulae	Neither	36.6	-15.504	-63.6117	16	17	0
148	Derivation data	5	no	no	no	no	yes	no	no	no	no	no	no	no	Oxygen supplementation	Neither	36.5	-22.8139	-93.5726	17	18	0
148	Derivation data	5	no	no	no	no	no	no	no	no	no	no	no	no	None	Neither	36.5	-22.8139	-93.5726	18	19	0
148	Derivation data	5	no	no	no	no	no	no	no	no	no	no	no	no	None	Neither	36.5	-22.8139	-93.5726	19	20	0
148	Derivation data	5	no	no	no	no	no	no	no	no	no	no	no	no	None	Neither	36.5	-22.8139	-93.5726	20	21	0
148	Derivation data	5	no	no	no	no	no	no	no	no	no	no	no	no	None	Neither	36.5	-22.8139	-93.5726	21	22	0
148	Derivation data	5	no	no	no	no	no	no	no	no	no	no	no	no	None	Neither	36.6	-15.504	-63.6117	22	23	0
148	Derivation data	5	no	no	no	no	no	no	no	no	no	no	no	no	None	Neither	36.6	-15.504	-63.6117	23	24	0
148	Derivation data	5	no	no	no	no	no	no	no	no	no	no	no	no	None	Neither	36.4	-30.1038	-123.432	24	25	0
148	Derivation data	5	no	no	no	no	no	no	no	no	no	no	no	no	None	Neither	36.8	-0.82392	-3.38273	25	26	0
148	Derivation data	5	no	no	no	no	no	no	no	no	no	no	no	no	None	Neither	36.5	-22.8139	-93.5726	26	27	0
148	Derivation data	5	no	no	no	no	no	no	no	no	no	no	no	no	None	Neither	36.5	-22.8139	-93.5726	27	28	0
149	Derivation data	5	no	yes	yes	no	yes	no	no	no	no	yes	no	no	CPAP, BiPAP, high flow nasal cannulae	Neither	36.4	-30.1038	-123.432	0	0.5	0
149	Derivation data	5	no	yes	yes	no	yes	no	no	no	no	yes	no	no	CPAP, BiPAP, high flow nasal cannulae	Neither	36.4	-30.1038	-123.432	0.5	1	0
149	Derivation data	5	no	yes	yes	no	yes	no	no	no	no	yes	no	no	CPAP, BiPAP, high flow nasal cannulae	Neither	36.4	-30.1038	-123.432	1	2	0
149	Derivation data	5	no	yes	no	no	yes	no	no	no	no	no	no	no	Oxygen supplementation	Neither	36.5	-22.8139	-93.5726	2	3	0
149	Derivation data	5	no	no	no	no	no	no	no	no	no	no	no	no	None	Neither	36.5	-22.8139	-93.5726	3	4	0
149	Derivation data	5	no	no	no	no	no	no	no	no	no	no	no	no	None	Neither	36.6	-15.504	-63.6117	4	5	0
150	Validation data	15	yes	yes	no	no	no	no	no	no	no	no	no	yes	Oxygen supplementation	Neither	36.9	6.54625	26.8855	0	0.5	0
150	Validation data	15	yes	yes	no	no	no	no	no	no	no	no	no	yes	Oxygen supplementation	Neither	36.9	6.54625	26.8855	0.5	1	0
150	Validation data	15	yes	yes	no	no	no	no	no	no	no	no	no	yes	Oxygen supplementation	Neither	36.9	6.54625	26.8855	1	2	0
150	Validation data	15	no	no	no	no	no	no	no	no	no	no	no	no	Oxygen supplementation	Neither	37	13.9361	57.2547	2	3	0
151	Derivation data	11	no	yes	no	yes	yes	no	no	no	no	no	no	no	CPAP, BiPAP, high flow nasal cannulae	Neither	37.3	36.2261	148.977	0	0.5	0
151	Derivation data	11	no	yes	no	yes	yes	no	no	no	no	no	no	no	CPAP, BiPAP, high flow nasal cannulae	Neither	37.3	36.2261	148.977	0.5	1	0
151	Derivation data	11	no	yes	no	yes	yes	no	no	no	no	no	no	no	CPAP, BiPAP, high flow nasal cannulae	Neither	37.3	36.2261	148.977	1	2	0
151	Derivation data	11	no	yes	no	yes	no	no	no	no	no	no	no	no	None	Neither	37	13.9361	57.2547	2	3	0
151	Derivation data	11	no	yes	no	no	no	no	no	no	no	no	no	no	None	Neither	37.3	36.2261	148.977	3	4	0
151	Derivation data	11	no	yes	no	no	yes	no	no	no	no	no	no	no	CPAP, BiPAP, high flow nasal cannulae	Neither	37	13.9361	57.2547	4	5	0
151	Derivation data	11	no	yes	no	no	no	no	no	no	no	no	no	no	Oxygen supplementation	Neither	37	13.9361	57.2547	5	6	0
151	Derivation data	11	no	yes	no	no	no	no	no	no	no	no	no	no	Oxygen supplementation	Neither	37	13.9361	57.2547	6	7	0
151	Derivation data	11	no	yes	no	yes	no	no	no	no	no	no	no	no	Oxygen supplementation	Neither	37	13.9361	57.2547	7	8	0
151	Derivation data	11	no	yes	no	yes	yes	no	no	no	no	no	no	no	Oxygen supplementation	Neither	37	13.9361	57.2547	8	9	0
151	Derivation data	11	no	yes	no	no	yes	no	no	no	no	no	no	no	Invasive ventilation	Neither	37	13.9361	57.2547	9	10	0
151	Derivation data	11	no	yes	no	no	yes	no	no	no	no	no	no	no	Oxygen supplementation	Neither	37.1	21.346	87.7262	10	11	0
151	Derivation data	11	no	no	no	no	yes	no	no	no	no	no	no	no	Oxygen supplementation	Neither	36.8	-0.82392	-3.38273	11	12	0
151	Derivation data	11	no	no	no	no	no	no	no	no	no	no	no	no	None	Neither	36.9	6.54625	26.8855	12	13	0
152	Derivation data	17	no	yes	no	yes	no	no	no	yes	no	no	no	no	Oxygen supplementation	Lethargy only	36.7	-8.17381	-33.5477	0	0.5	0
152	Derivation data	17	no	yes	no	yes	no	no	no	yes	no	no	no	no	Oxygen supplementation	Lethargy only	36.7	-8.17381	-33.5477	0.5	1	1
153	Derivation data	11	no	yes	no	no	no	no	no	no	no	no	no	no	None	Neither	37	13.9361	57.2547	0	0.5	0
153	Derivation data	11	no	yes	no	no	no	no	no	no	no	no	no	no	None	Neither	37	13.9361	57.2547	0.5	1	0
153	Derivation data	11	no	yes	no	no	no	no	no	no	no	no	no	no	None	Neither	37.7	66.2262	272.708	1	2	0
153	Derivation data	11	no	yes	no	no	no	no	no	no	no	no	no	no	None	Neither	37.2	28.7762	118.301	2	3	0
153	Derivation data	11	no	no	no	no	no	no	no	no	no	no	no	no	None	Neither	37	13.9361	57.2547	3	4	0
153	Derivation data	11	no	yes	no	no	no	no	no	no	no	no	no	no	None	Neither	36.9	6.54625	26.8855	4	5	0
153	Derivation data	11	no	no	no	no	no	no	no	no	no	no	no	no	None	Neither	37	13.9361	57.2547	5	6	0
153	Derivation data	11	no	no	no	no	no	no	no	no	no	no	no	no	None	Neither	37.2	28.7762	118.301	6	7	0
153	Derivation data	11	no	no	no	no	no	no	no	no	no	no	no	no	None	Neither	37.2	28.7762	118.301	7	8	0
153	Derivation data	11	no	yes	no	no	no	no	no	no	no	no	no	no	None	Neither	37.3	36.2261	148.977	8	9	0
153	Derivation data	11	no	no	no	no	no	no	no	no	no	no	no	no	None	Neither	36.9	6.54625	26.8855	9	10	0
153	Derivation data	11	no	no	no	no	no	no	no	no	no	no	no	no	None	Neither	36.8	-0.82392	-3.38273	10	11	0
153	Derivation data	11	no	yes	no	no	no	no	no	no	no	no	no	no	None	Neither	36.8	-0.82392	-3.38273	11	12	0
153	Derivation data	11	no	no	no	no	no	no	no	no	no	no	no	no	None	Neither	36.9	6.54625	26.8855	12	13	0
153	Derivation data	11	yes	no	no	no	no	no	no	no	no	no	no	no	None	Neither	36.9	6.54625	26.8855	13	14	0
153	Derivation data	11	no	yes	no	no	no	no	no	no	no	no	no	no	None	Neither	37	13.9361	57.2547	14	15	0
153	Derivation data	11	no	yes	no	no	no	no	no	no	no	no	no	no	None	Neither	36.7	-8.17381	-33.5477	15	16	0
153	Derivation data	11	no	no	no	no	no	no	no	no	no	no	no	no	None	Neither	37	13.9361	57.2547	16	17	0
154	Derivation data	5	no	no	yes	no	yes	no	no	yes	yes	yes	no	no	Invasive ventilation	Lethargy only	36.7	-8.17381	-33.5477	0	0.5	0
154	Derivation data	5	no	no	yes	no	yes	no	no	yes	yes	yes	no	no	Invasive ventilation	Lethargy only	36.7	-8.17381	-33.5477	0.5	1	0
154	Derivation data	5	no	no	no	no	yes	no	no	no	yes	no	no	no	Invasive ventilation	Lethargy only	36.4	-30.1038	-123.432	1	2	0
154	Derivation data	5	no	no	no	no	yes	no	no	no	no	no	no	no	Invasive ventilation	Neither	36.3	-37.3739	-153.19	2	3	0
154	Derivation data	5	no	no	no	no	no	no	no	no	no	no	no	no	None	Neither	36.6	-15.504	-63.6117	3	4	0
154	Derivation data	5	no	no	no	no	no	no	no	no	no	no	no	no	None	Neither	36.4	-30.1038	-123.432	4	5	0
154	Derivation data	5	no	no	no	no	no	no	no	no	no	no	no	no	None	Neither	36.5	-22.8139	-93.5726	5	6	0
154	Derivation data	5	no	no	no	no	no	no	no	no	no	no	no	no	None	Neither	36.6	-15.504	-63.6117	6	7	0
154	Derivation data	5	no	no	no	no	no	no	no	no	no	no	no	no	None	Neither	36.6	-15.504	-63.6117	7	8	0
155	Derivation data	4	no	yes	yes	no	no	no	no	no	no	no	no	yes	None	Neither	36.4	-30.1038	-123.432	0	0.5	0
155	Derivation data	4	no	yes	yes	no	no	no	no	no	no	no	no	yes	None	Neither	36.4	-30.1038	-123.432	0.5	1	0
155	Derivation data	4	no	yes	no	no	no	no	no	no	no	no	no	no	None	Neither	37	13.9361	57.2547	1	2	0
155	Derivation data	4	no	yes	no	no	no	no	no	no	no	no	no	no	None	Neither	36.5	-22.8139	-93.5726	2	3	0
155	Derivation data	4	no	yes	no	no	no	no	no	no	no	no	no	no	None	Neither	37	13.9361	57.2547	3	4	0
155	Derivation data	4	no	yes	no	no	no	no	no	no	no	no	no	no	None	Neither	36.5	-22.8139	-93.5726	4	5	0
155	Derivation data	4	no	yes	no	no	no	no	no	no	no	no	no	no	None	Neither	36.5	-22.8139	-93.5726	5	6	0
155	Derivation data	4	no	yes	no	no	no	no	no	no	no	no	no	no	None	Neither	36.7	-8.17381	-33.5477	6	7	0
155	Derivation data	4	no	yes	no	no	yes	no	no	no	no	no	no	no	Invasive ventilation	Neither	37	13.9361	57.2547	7	8	0
155	Derivation data	4	no	yes	no	no	yes	no	no	no	no	no	no	no	Invasive ventilation	Neither	36.5	-22.8139	-93.5726	8	9	0
155	Derivation data	4	no	yes	no	no	yes	no	no	no	no	no	no	no	CPAP, BiPAP, high flow nasal cannulae	Neither	36.6	-15.504	-63.6117	9	10	0
155	Derivation data	4	no	yes	no	no	no	no	no	no	no	no	no	no	None	Neither	37	13.9361	57.2547	10	11	0
155	Derivation data	4	no	yes	no	no	no	no	no	no	no	no	no	no	None	Neither	36.5	-22.8139	-93.5726	11	12	0
155	Derivation data	4	no	yes	no	no	no	no	no	no	no	no	no	no	None	Neither	36.5	-22.8139	-93.5726	12	13	0
155	Derivation data	4	no	yes	no	no	no	no	no	no	no	no	no	no	None	Neither	36.7	-8.17381	-33.5477	13	14	0
155	Derivation data	4	no	yes	no	no	no	no	no	no	no	no	no	no	None	Neither	36.8	-0.82392	-3.38273	14	15	0
156	Derivation data	2	yes	no	no	no	no	no	yes	no	no	no	no	no	None	Lethargy only	37.5	51.1861	210.638	0	0.5	0
156	Derivation data	2	yes	no	no	no	no	no	yes	no	no	no	no	no	None	Lethargy only	37.5	51.1861	210.638	0.5	1	0
156	Derivation data	2	yes	no	no	no	no	no	yes	no	no	no	no	no	None	Lethargy only	37.5	51.1861	210.638	1	2	0
156	Derivation data	2	no	no	no	no	no	no	no	no	no	no	no	no	None	Neither	37.3	36.2261	148.977	2	3	0
156	Derivation data	2	no	no	no	no	no	no	no	no	no	no	no	no	None	Neither	36.8	-0.82392	-3.38273	3	4	0
156	Derivation data	2	no	no	no	no	no	no	no	no	no	no	no	no	None	Neither	37.3	36.2261	148.977	4	5	0
156	Derivation data	2	no	no	no	no	no	no	no	no	no	no	no	no	None	Neither	37.4	43.6962	179.757	5	6	0
156	Derivation data	2	no	no	no	no	no	no	no	no	no	no	no	no	None	Neither	37.3	36.2261	148.977	6	7	0
156	Derivation data	2	no	no	no	no	no	no	no	no	no	no	no	no	None	Neither	37.2	28.7762	118.301	7	8	0
157	Validation data	7	no	no	yes	yes	no	no	no	no	no	no	no	no	None	Neither	36.9	6.54625	26.8855	0	0.5	0
157	Validation data	7	no	no	yes	yes	no	no	no	no	no	no	no	no	None	Neither	36.9	6.54625	26.8855	0.5	1	0
157	Validation data	7	no	no	no	yes	no	no	no	no	no	no	no	no	None	Neither	36.8	-0.82392	-3.38273	1	2	0
157	Validation data	7	no	no	no	no	no	no	no	no	no	no	no	no	None	Neither	36.7	-8.17381	-33.5477	2	3	0
157	Validation data	7	no	no	no	no	no	no	no	no	no	no	no	no	None	Neither	36.7	-8.17381	-33.5477	3	4	0
157	Validation data	7	no	no	no	no	no	no	no	no	no	no	no	no	None	Neither	36.8	-0.82392	-3.38273	4	5	0
158	Derivation data	12	no	no	no	no	no	no	no	no	no	no	no	no	None	Neither	38.3	111.826	461.382	0	0.5	0
158	Derivation data	12	no	no	no	no	no	no	no	no	no	no	no	no	None	Neither	38.3	111.826	461.382	0.5	1	0
158	Derivation data	12	no	no	no	no	no	no	no	no	no	no	no	no	None	Neither	38.3	111.826	461.382	1	2	0
158	Derivation data	12	yes	no	no	no	no	yes	yes	no	no	no	no	no	None	Neither	38.8	150.376	621.44	2	3	0
158	Derivation data	12	yes	no	no	no	no	no	no	no	no	no	no	no	None	Neither	36.8	-0.82392	-3.38273	3	4	0
158	Derivation data	12	yes	no	no	no	no	no	no	no	no	no	no	no	None	Neither	37	13.9361	57.2547	4	5	0
158	Derivation data	12	yes	yes	no	no	no	no	no	no	no	no	no	no	None	Neither	36.5	-22.8139	-93.5726	5	6	0
158	Derivation data	12	no	no	no	no	no	no	no	no	no	no	no	no	None	Neither	36.7	-8.17381	-33.5477	6	7	0
158	Derivation data	12	no	no	no	no	no	no	no	no	no	no	no	no	None	Neither	37	13.9361	57.2547	7	8	0
158	Derivation data	12	no	no	no	no	no	no	no	no	no	no	no	no	None	Neither	37	13.9361	57.2547	8	9	0
158	Derivation data	12	no	no	no	no	no	no	no	no	no	no	no	no	None	Neither	37.2	28.7762	118.301	9	10	0
158	Derivation data	12	no	no	no	no	no	no	no	no	no	no	no	no	None	Neither	36.6	-15.504	-63.6117	10	11	0
158	Derivation data	12	no	no	no	no	yes	no	no	no	yes	no	no	no	None	Neither	37	13.9361	57.2547	11	12	0
158	Derivation data	12	no	no	no	no	no	no	no	no	no	no	no	no	None	Neither	36.8	-0.82392	-3.38273	12	13	0
158	Derivation data	12	no	no	no	no	no	no	no	no	no	no	no	no	None	Neither	36.8	-0.82392	-3.38273	13	14	0
158	Derivation data	12	no	no	no	no	no	no	no	no	no	no	no	no	None	Neither	36.8	-0.82392	-3.38273	14	15	0
158	Derivation data	12	no	no	no	no	no	no	no	no	no	no	no	no	None	Neither	37	13.9361	57.2547	15	16	0
158	Derivation data	12	no	no	no	no	no	no	no	no	no	no	no	no	None	Neither	37	13.9361	57.2547	16	17	0
159	Derivation data	7	no	no	yes	no	yes	no	no	no	yes	no	yes	no	Invasive ventilation	Neither	36.4	-30.1038	-123.432	0	0.5	0
159	Derivation data	7	no	no	yes	no	yes	no	no	no	yes	no	yes	no	Invasive ventilation	Neither	36.4	-30.1038	-123.432	0.5	1	0
159	Derivation data	7	no	no	yes	no	yes	no	no	no	no	no	no	no	Invasive ventilation	Neither	36.6	-15.504	-63.6117	1	2	0
159	Derivation data	7	no	no	no	no	yes	no	no	no	no	no	no	no	Invasive ventilation	Neither	36.7	-8.17381	-33.5477	2	3	0
159	Derivation data	7	no	no	no	no	yes	no	no	no	no	no	no	no	Invasive ventilation	Neither	36.8	-0.82392	-3.38273	3	4	0
159	Derivation data	7	no	no	no	no	yes	no	no	no	no	no	no	no	Invasive ventilation	Neither	37	13.9361	57.2547	4	5	0
159	Derivation data	7	no	no	no	no	yes	no	no	no	no	no	no	no	Invasive ventilation	Neither	36.8	-0.82392	-3.38273	5	6	0
159	Derivation data	7	no	no	no	no	yes	no	no	no	no	no	no	no	Invasive ventilation	Neither	36.6	-15.504	-63.6117	6	7	0
159	Derivation data	7	no	no	no	no	yes	no	no	no	no	no	no	no	Invasive ventilation	Neither				7	8	0
159	Derivation data	7	no	no	no	no	yes	no	no	no	no	no	no	no	Invasive ventilation	Neither	36.7	-8.17381	-33.5477	8	9	0
159	Derivation data	7	no	no	no	no	yes	no	no	no	no	no	no	no	None	Neither	36.6	-15.504	-63.6117	9	10	0
159	Derivation data	7	no	no	no	no	yes	no	no	no	no	no	no	no	None	Neither	36.8	-0.82392	-3.38273	10	11	0
159	Derivation data	7	no	no	no	no	yes	no	no	no	no	no	no	no	Invasive ventilation	Neither	36.7	-8.17381	-33.5477	11	12	0
159	Derivation data	7	no	no	no	no	yes	no	no	no	no	no	no	no	Invasive ventilation	Neither	36.9	6.54625	26.8855	12	13	0
159	Derivation data	7	no	no	no	no	yes	no	no	no	no	no	no	no	None	Neither	36.9	6.54625	26.8855	13	14	0
160	Derivation data	8	no	no	no	no	yes	no	no	yes	yes	no	no	no	Invasive ventilation	Reduced/no movement	37	13.9361	57.2547	0	0.5	0
160	Derivation data	8	no	no	no	no	yes	no	no	yes	yes	no	no	no	Invasive ventilation	Reduced/no movement	37	13.9361	57.2547	0.5	1	0
160	Derivation data	8	no	no	no	no	yes	no	no	no	no	no	no	no	Invasive ventilation	Neither	38.2	104.176	429.68	1	2	0
160	Derivation data	8	no	no	no	no	yes	no	no	no	no	no	no	no	Invasive ventilation	Neither	37.5	51.1861	210.638	2	3	0
160	Derivation data	8	no	no	no	no	yes	no	no	no	no	no	no	no	Invasive ventilation	Neither	37.2	28.7762	118.301	3	4	0
160	Derivation data	8	no	no	no	no	yes	no	no	no	no	no	no	no	Invasive ventilation	Reduced/no movement	37	13.9361	57.2547	4	5	0
160	Derivation data	8	no	no	no	no	yes	no	no	no	no	no	no	no	Invasive ventilation	Neither	37.2	28.7762	118.301	5	6	0
160	Derivation data	8	no	no	no	no	yes	no	no	no	no	no	no	no	Invasive ventilation	Neither	37	13.9361	57.2547	6	7	0
160	Derivation data	8	no	no	no	no	yes	no	no	no	no	no	no	no	CPAP, BiPAP, high flow nasal cannulae	Neither	37.1	21.346	87.7262	7	8	0
160	Derivation data	8	yes	no	no	no	yes	no	no	no	no	no	no	no	Oxygen supplementation	Neither	37	13.9361	57.2547	8	9	0
160	Derivation data	8	no	no	no	no	yes	no	no	no	no	no	no	no	Oxygen supplementation	Neither	37	13.9361	57.2547	9	10	0
160	Derivation data	8	no	no	no	no	no	no	no	no	no	no	no	no	None	Neither	37.2	28.7762	118.301	10	11	0
160	Derivation data	8	no	no	no	no	no	no	no	no	no	no	no	no	None	Neither	37	13.9361	57.2547	11	12	0
160	Derivation data	8	no	no	no	no	no	no	no	no	no	no	no	no	None	Neither	37.1	21.346	87.7262	12	13	0
160	Derivation data	8	no	no	no	no	no	no	no	no	no	no	no	no	None	Neither	37	13.9361	57.2547	13	14	0
160	Derivation data	8	no	no	no	no	no	no	no	no	no	no	no	no	None	Neither	37.4	43.6962	179.757	14	15	0
160	Derivation data	8	no	no	no	no	no	no	no	no	no	no	no	no	None	Neither	37.2	28.7762	118.301	15	16	0
160	Derivation data	8	no	no	no	no	no	no	no	no	no	no	no	no	None	Neither	37.5	51.1861	210.638	16	17	0
160	Derivation data	8	no	no	no	no	no	no	no	no	no	no	no	no	None	Neither	37	13.9361	57.2547	17	18	0
160	Derivation data	8	no	no	no	no	no	no	no	no	no	no	no	no	None	Neither	37	13.9361	57.2547	18	19	0
160	Derivation data	8	no	no	no	no	no	no	no	no	no	no	no	no	None	Neither	37	13.9361	57.2547	19	20	0
160	Derivation data	8	no	no	no	no	no	no	no	no	no	no	no	no	None	Neither	37.1	21.346	87.7262	20	21	0
160	Derivation data	8	no	no	no	no	no	no	no	no	no	no	no	no	None	Neither	37	13.9361	57.2547	21	22	0
160	Derivation data	8	no	no	no	no	no	no	no	no	no	no	no	no	None	Neither	37.2	28.7762	118.301	22	23	0
160	Derivation data	8	no	no	no	no	no	no	no	no	no	no	no	no	None	Neither	37	13.9361	57.2547	23	24	0
160	Derivation data	8	no	no	no	no	no	no	no	no	no	no	no	no	None	Neither	37.2	28.7762	118.301	24	25	0
160	Derivation data	8	no	no	no	no	no	no	no	no	no	no	no	no	None	Neither	37.2	28.7762	118.301	25	26	0
161	Derivation data	14	no	no	no	no	yes	no	no	no	no	yes	no	no	CPAP, BiPAP, high flow nasal cannulae	Neither	36.8	-0.82392	-3.38273	0	0.5	0
161	Derivation data	14	no	no	no	no	yes	no	no	no	no	yes	no	no	CPAP, BiPAP, high flow nasal cannulae	Neither	36.8	-0.82392	-3.38273	0.5	1	0
161	Derivation data	14	no	no	no	no	yes	no	no	no	no	yes	no	no	CPAP, BiPAP, high flow nasal cannulae	Neither	36.8	-0.82392	-3.38273	1	2	0
161	Derivation data	14	yes	no	no	yes	yes	no	no	no	no	no	no	no	CPAP, BiPAP, high flow nasal cannulae	Neither	36.5	-22.8139	-93.5726	2	3	0
161	Derivation data	14	yes	no	no	yes	yes	no	no	no	no	no	no	no	CPAP, BiPAP, high flow nasal cannulae	Neither	36.6	-15.504	-63.6117	3	4	0
161	Derivation data	14	yes	no	no	no	no	no	no	no	no	no	no	no	None	Neither	36.7	-8.17381	-33.5477	4	5	0
161	Derivation data	14	yes	no	no	no	yes	no	no	no	no	no	no	no	None	Neither	36.7	-8.17381	-33.5477	5	6	0
161	Derivation data	14	yes	yes	no	no	yes	no	no	no	no	no	no	no	None	Neither	36.7	-8.17381	-33.5477	6	7	0
161	Derivation data	14	no	no	no	no	no	no	no	no	no	no	no	no	None	Neither	36.6	-15.504	-63.6117	7	8	0
161	Derivation data	14	yes	no	no	yes	no	no	no	no	no	no	no	no	None	Neither	36.6	-15.504	-63.6117	8	9	0
161	Derivation data	14	yes	no	no	no	no	no	no	no	no	no	no	no	None	Neither	36.8	-0.82392	-3.38273	9	10	0
161	Derivation data	14	yes	no	no	no	no	no	no	no	no	no	no	no	None	Neither	36.7	-8.17381	-33.5477	10	11	0
161	Derivation data	14	yes	no	no	no	no	no	no	no	no	no	no	no	None	Neither	36.6	-15.504	-63.6117	11	12	0
161	Derivation data	14	yes	no	no	no	yes	no	no	no	no	no	no	no	None	Neither	36.9	6.54625	26.8855	12	13	0
161	Derivation data	14	no	no	no	no	no	no	no	no	no	no	no	no	None	Neither	36.8	-0.82392	-3.38273	13	14	0
161	Derivation data	14	no	no	no	no	no	no	no	no	no	no	no	no	None	Neither	36.7	-8.17381	-33.5477	14	15	0
161	Derivation data	14	no	no	no	no	no	no	no	no	no	no	no	no	None	Neither	36.8	-0.82392	-3.38273	15	16	0
161	Derivation data	14	no	no	no	no	no	no	no	no	no	no	no	no	None	Neither	36.8	-0.82392	-3.38273	16	17	0
161	Derivation data	14	no	no	no	no	yes	no	no	no	no	no	no	no	Oxygen supplementation	Neither	36.7	-8.17381	-33.5477	17	18	0
161	Derivation data	14	yes	no	no	no	yes	no	no	no	no	no	no	no	Oxygen supplementation	Neither	36.7	-8.17381	-33.5477	18	19	0
161	Derivation data	14	no	no	no	no	yes	no	no	no	no	yes	no	no	Oxygen supplementation	Neither	36.7	-8.17381	-33.5477	19	20	0
161	Derivation data	14	no	no	no	no	no	no	no	no	no	no	no	no	None	Neither	36.5	-22.8139	-93.5726	20	21	0
161	Derivation data	14	no	no	no	no	yes	no	no	no	no	yes	no	no	Oxygen supplementation	Neither	36.7	-8.17381	-33.5477	21	22	0
161	Derivation data	14	no	no	no	no	yes	no	no	no	no	no	no	yes	Oxygen supplementation	Neither	36.6	-15.504	-63.6117	22	23	0
161	Derivation data	14	no	no	no	no	no	no	no	no	no	no	no	no	None	Neither	36.5	-22.8139	-93.5726	23	24	0
161	Derivation data	14	no	no	no	no	no	no	no	no	no	no	no	no	Oxygen supplementation	Neither	36.5	-22.8139	-93.5726	24	25	0
161	Derivation data	14	no	no	no	no	no	no	no	no	no	no	no	no	None	Neither	36.8	-0.82392	-3.38273	25	26	0
161	Derivation data	14	no	no	no	no	no	no	no	no	no	no	no	no	None	Neither	36.6	-15.504	-63.6117	26	27	0
162	Derivation data	3	yes	no	no	no	yes	no	no	no	no	no	no	no	None	Lethargy only	37.1	21.346	87.7262	0	0.5	0
162	Derivation data	3	yes	no	no	no	yes	no	no	no	no	no	no	no	None	Lethargy only	37.1	21.346	87.7262	0.5	1	0
162	Derivation data	3	no	no	no	no	yes	no	no	no	no	no	no	no	Oxygen supplementation	Lethargy only	37.4	43.6962	179.757	1	2	0
162	Derivation data	3	no	no	no	no	yes	no	no	no	no	no	no	no	Oxygen supplementation	Neither	36.5	-22.8139	-93.5726	2	3	0
162	Derivation data	3	no	no	no	no	yes	no	no	no	no	no	no	no	Oxygen supplementation	Neither	36.5	-22.8139	-93.5726	3	4	0
162	Derivation data	3	no	no	no	no	no	no	no	no	no	no	no	no	None	Neither	36.5	-22.8139	-93.5726	4	5	0
162	Derivation data	3	no	no	no	no	no	no	no	no	no	no	no	no	None	Neither	36.7	-8.17381	-33.5477	5	6	0
162	Derivation data	3	no	no	no	no	no	no	no	no	no	no	no	no	None	Neither	37.1	21.346	87.7262	6	7	0
163	Derivation data	2	no	no	no	no	yes	yes	no	yes	yes	no	no	no	Invasive ventilation	Neither	37.4	43.6962	179.757	0	0.5	0
163	Derivation data	2	no	no	no	no	yes	yes	no	yes	yes	no	no	no	Invasive ventilation	Neither	37.4	43.6962	179.757	0.5	1	0
163	Derivation data	2	no	no	no	no	no	no	no	no	no	no	no	no	Invasive ventilation	Neither	36.6	-15.504	-63.6117	1	2	0
163	Derivation data	2	no	no	no	no	no	no	no	no	no	no	no	no	Invasive ventilation	Neither	36.7	-8.17381	-33.5477	2	3	0
163	Derivation data	2	no	no	no	no	no	no	no	no	no	no	no	no	Invasive ventilation	Neither	36.8	-0.82392	-3.38273	3	4	0
163	Derivation data	2	no	no	no	no	yes	no	no	no	no	no	no	no	Invasive ventilation	Neither	37.3	36.2261	148.977	4	5	0
163	Derivation data	2	no	no	no	no	no	no	no	no	no	no	yes	no	Invasive ventilation	Neither	36.8	-0.82392	-3.38273	5	6	1
164	Derivation data	4	no	no	no	no	no	no	no	no	no	no	no	no	None	Neither	37	13.9361	57.2547	0	0.5	0
164	Derivation data	4	no	no	no	no	no	no	no	no	no	no	no	no	None	Neither	37	13.9361	57.2547	0.5	1	0
164	Derivation data	4	no	no	no	yes	no	no	no	no	no	no	no	no	None	Neither	36.8	-0.82392	-3.38273	1	2	0
164	Derivation data	4	no	no	no	no	no	no	no	no	no	no	no	no	None	Neither	36.7	-8.17381	-33.5477	2	3	0
164	Derivation data	4	no	no	no	no	no	no	no	no	no	no	no	no	None	Neither	36.7	-8.17381	-33.5477	3	4	0
164	Derivation data	4	no	no	no	yes	no	no	no	no	no	no	no	no	None	Neither	36.9	6.54625	26.8855	4	5	0
164	Derivation data	4	no	no	no	no	no	no	no	no	no	no	no	no	None	Neither	36.7	-8.17381	-33.5477	5	6	0
164	Derivation data	4	no	no	no	no	no	no	no	no	no	no	no	no	None	Neither	36.7	-8.17381	-33.5477	6	7	0
164	Derivation data	4	no	no	no	no	no	no	no	no	no	no	no	no	None	Neither	36.8	-0.82392	-3.38273	7	8	0
164	Derivation data	4	no	no	no	no	no	no	no	no	no	no	no	no	None	Neither	36.5	-22.8139	-93.5726	8	9	0
164	Derivation data	4	no	no	no	no	no	no	no	no	no	no	no	no	None	Neither	36.7	-8.17381	-33.5477	9	10	0
164	Derivation data	4	no	no	no	no	no	no	no	no	no	no	no	no	None	Neither	36.6	-15.504	-63.6117	10	11	0
165	Validation data	4	yes	no	no	yes	no	no	yes	yes	no	no	no	no	None	Neither	36.6	-15.504	-63.6117	0	0.5	0
165	Validation data	4	yes	no	no	yes	no	no	yes	yes	no	no	no	no	None	Neither	36.6	-15.504	-63.6117	0.5	1	0
165	Validation data	4	no	no	no	yes	no	no	no	no	no	no	no	no	None	Neither	36.7	-8.17381	-33.5477	1	2	0
165	Validation data	4	no	no	no	no	no	no	no	no	no	no	no	no	None	Neither	36.6	-15.504	-63.6117	2	3	0
165	Validation data	4	no	no	no	no	no	no	no	no	no	no	no	no	None	Neither	37.1	21.346	87.7262	3	4	0
165	Validation data	4	no	no	no	no	no	no	no	no	no	no	no	no	None	Neither	36.8	-0.82392	-3.38273	4	5	0
165	Validation data	4	no	no	no	no	no	no	no	no	no	no	no	no	None	Neither	36.7	-8.17381	-33.5477	5	6	0
165	Validation data	4	no	no	no	no	no	no	no	no	no	no	no	no	None	Neither	36.8	-0.82392	-3.38273	6	7	0
165	Validation data	4	no	no	no	no	no	no	no	no	no	no	no	no	None	Neither	36.6	-15.504	-63.6117	7	8	0
165	Validation data	4	no	no	no	no	no	no	no	no	no	no	no	yes	None	Neither	36.6	-15.504	-63.6117	8	9	0
165	Validation data	4	no	no	no	no	no	no	no	no	no	no	no	yes	None	Neither	36.8	-0.82392	-3.38273	9	10	0
165	Validation data	4	no	no	no	no	no	no	no	no	no	no	no	no	None	Neither	36.7	-8.17381	-33.5477	10	11	0
165	Validation data	4	no	no	no	no	no	no	no	no	no	no	no	yes	None	Neither	36.8	-0.82392	-3.38273	11	12	0
165	Validation data	4	no	no	no	no	no	no	no	no	no	no	no	no	None	Neither	36.6	-15.504	-63.6117	12	13	0
165	Validation data	4	no	no	no	no	no	no	no	no	no	no	no	no	None	Neither	36.7	-8.17381	-33.5477	13	14	0
165	Validation data	4	no	no	no	no	no	no	no	no	no	no	no	no	None	Neither	36.6	-15.504	-63.6117	14	15	0
165	Validation data	4	no	no	no	no	no	no	no	no	no	no	no	no	None	Neither	36.5	-22.8139	-93.5726	15	16	0
165	Validation data	4	no	no	no	no	no	no	no	no	no	no	no	no	None	Neither	36.5	-22.8139	-93.5726	16	17	0
165	Validation data	4	no	no	no	no	no	no	no	no	no	no	no	no	None	Neither	36.8	-0.82392	-3.38273	17	18	0
165	Validation data	4	no	no	no	no	no	no	no	no	no	no	no	yes	None	Neither	36.6	-15.504	-63.6117	18	19	0
165	Validation data	4	no	no	no	no	no	no	no	no	no	no	no	no	None	Neither	36.7	-8.17381	-33.5477	19	20	0
166	Derivation data	5	yes	no	no	no	yes	no	no	no	no	yes	no	no	Oxygen supplementation	Lethargy only	36.5	-22.8139	-93.5726	0	0.5	0
166	Derivation data	5	yes	no	no	no	yes	no	no	no	no	yes	no	no	Oxygen supplementation	Lethargy only	36.5	-22.8139	-93.5726	0.5	1	0
166	Derivation data	5	yes	no	no	no	yes	no	no	no	no	yes	no	no	Oxygen supplementation	Lethargy only	36.5	-22.8139	-93.5726	1	2	0
166	Derivation data	5	yes	no	no	no	yes	no	no	no	no	no	no	no	Oxygen supplementation	Neither	36.5	-22.8139	-93.5726	2	3	0
167	Derivation data	16	yes	yes	yes	no	no	no	no	yes	no	no	no	no	None	Lethargy only	37.2	28.7762	118.301	0	0.5	0
[truncated: 33,172 more rows]
